# Supplementary material for: Mechanical and chemical element structures of sea urchin spines: specialization in ambulacral and interambulacral areas
Source: PeerJ journal article supplement (doi:10.7717/peerj-matsci.38), 2025-07-30
Supplement: bending_testambu.xlsx [file bending_testambu.xlsx]

## Sheet: bending-ambu001
force	displacement
0	0
0.02	0.015
0.04	0.031
0.05	0.047
0.06	0.063
0.07	0.08
0.09	0.096
0.1	0.113
0.11	0.129
0.13	0.146
0.14	0.162
0.15	0.178
0.16	0.194
0.17	0.21
0.18	0.225
0.2	0.241
0.21	0.257
0.22	0.273
0.23	0.29
0.25	0.306
0.26	0.323
0.27	0.339
0.28	0.355
0.29	0.371
0.3	0.387
0.32	0.403
0.33	0.419
0.34	0.435
0.35	0.451
0.36	0.467
0.37	0.483
0.39	0.5
0.39	0.516
0.41	0.533
0.42	0.549
0.43	0.565
0.44	0.582
0.45	0.597
0.46	0.613
0.47	0.629
0.48	0.645
0.49	0.66
0.5	0.677
0.52	0.693
0.52	0.71
0.53	0.726
0.54	0.743
0.55	0.759
0.56	0.775
0.57	0.791
0.59	0.807
0.6	0.823
0.61	0.838
0.61	0.854
0.63	0.871
0.63	0.887
0.65	0.903
0.65	0.92
0.67	0.936
0.67	0.953
0.69	0.969
0.7	0.985
0.7	1.001
0.72	1.016
0.72	1.032
0.74	1.048
0.74	1.064
0.75	1.081
0.76	1.097
0.77	1.114
0.78	1.13
0.79	1.147
0.8	1.163
0.81	1.179
0.82	1.194
0.82	1.211
0.83	1.226
0.84	1.242
0.85	1.258
0.86	1.274
0.87	1.29
0.88	1.307
0.88	1.323
0.89	1.339
0.9	1.356
0.91	1.372
0.92	1.388
0.92	1.403
0.94	1.419
0.94	1.435
0.95	1.451
0.96	1.467
0.97	1.483
0.97	1.5
0.98	1.516
0.99	1.533
1	1.549
1	1.565
1.01	1.581
1.02	1.597
1.03	1.612
1.03	1.628
1.05	1.644
1.05	1.659
1.05	1.676
1.06	1.692
1.07	1.709
1.07	1.725
1.09	1.741
1.09	1.758
1.1	1.773
1.11	1.79
1.11	1.805
1.12	1.821
1.12	1.837
1.13	1.853
1.14	1.869
1.15	1.886
1.16	1.901
1.16	1.918
1.17	1.935
1.18	1.951
1.18	1.967
1.19	1.983
1.2	1.999
1.2	2.015
1.21	2.031
-0.07	2.047
0	2.064
0	2.08
0	2.097
0	2.113
0	2.13
0	2.146
0	2.162
0	2.179
0	2.194
0	2.21
0	2.226
0	2.241
0	2.257
0	2.273
0	2.29
0	2.306
0	2.323
0	2.34
0	2.356
0	2.372
0	2.388
0	2.403
0	2.42
0	2.435
0	2.451
0	2.467
0	2.484
0	2.501
0	2.517
0	2.533
0	2.55
0	2.566
0	2.582
0	2.598
0	2.613
0	2.629
0	2.645
0	2.661
0	2.678
0	2.694
0	2.711
0	2.727
0	2.743
0	2.759
0	2.776
0	2.792
0	2.808
0	2.823
0	2.839
0	2.855
0	2.871
0	2.888
0	2.903
0	2.92
0	2.937
0	2.953
0	2.97
0	2.986
0	3.002
0	3.017
0	3.033
0	3.049
0	3.065
0	3.081
0	3.098
0	3.114
0	3.131
0	3.148
0	3.164
0	3.18
0	3.196
0	3.212
0	3.227
0	3.243
0	3.259
0	3.275
0	3.292
0	3.308
0	3.324
0	3.341
0	3.358
0	3.374
0	3.39
0	3.405
0	3.421
0	3.437
0	3.453
0	3.469
0	3.486
0	3.502
0	3.519
0	3.535
0	3.551
0	3.568
0	3.584
0	3.6
0	3.615
0	3.631
0	3.647
0	3.663
0	3.68
0	3.696
0	3.713
0	3.729
0	3.746
0	3.762
0	3.779
0	3.794
0	3.81
0	3.825
0	3.841
0	3.857
0	3.873
0	3.89
0	3.906
0	3.923
0	3.939
0	3.956
0	3.972
0	3.988
0	4.004
0	4.019
0	4.035
0	4.051
0	4.067
0	4.083
0	4.1
0	4.116
0	4.133
0	4.15
0	4.166
0	4.182
0	4.197
0	4.213
0	4.229
0	4.244
0	4.26
0	4.277
0	4.293
0	4.31
0	4.326
0	4.343
0	4.359
0	4.374
0	4.39
0	4.406
0	4.422
0	4.438
0	4.453
0	4.47
0	4.486
0	4.502
0	4.519
0	4.535
0	4.552
0	4.568
0	4.583
0	4.6
0	4.615
0	4.631
0	4.647
0	4.662
0	4.678
0	4.695
0	4.711
0	4.728
0	4.744
0	4.76
0	4.777
0	4.792
0	4.808
0	4.823
0	4.839
0	4.855
0	4.871
0	4.888
0	4.904
0	4.921
0	4.937

## Sheet: bending-ambu002
force	displacement
0	0
0.01	0.015
0.03	0.031
0.05	0.047
0.06	0.064
0.08	0.08
0.09	0.097
0.11	0.113
0.13	0.13
0.14	0.146
0.15	0.162
0.17	0.178
0.18	0.193
0.2	0.209
0.21	0.225
0.23	0.24
0.24	0.256
0.26	0.272
0.27	0.288
0.29	0.305
0.3	0.32
0.32	0.337
0.33	0.353
0.35	0.368
0.36	0.384
0.38	0.4
0.4	0.416
0.41	0.432
0.42	0.448
0.44	0.464
0.45	0.48
0.47	0.497
0.48	0.514
0.5	0.53
0.51	0.547
0.53	0.563
0.54	0.579
0.56	0.595
0.57	0.61
0.58	0.626
0.6	0.642
0.61	0.658
0.63	0.674
0.64	0.691
0.66	0.708
0.68	0.725
0.69	0.741
0.7	0.757
0.72	0.773
0.73	0.789
0.75	0.805
0.76	0.82
0.78	0.836
0.79	0.852
0.8	0.868
0.82	0.884
0.83	0.901
0.84	0.918
0.86	0.934
0.88	0.95
0.89	0.966
0.9	0.982
0.92	0.998
0.93	1.014
0.95	1.029
0.96	1.046
0.97	1.062
0.98	1.078
1	1.095
1.01	1.111
1.02	1.128
1.04	1.144
1.05	1.16
1.06	1.176
1.08	1.192
1.1	1.208
1.11	1.224
-0.02	1.24
0	1.256
0	1.273
0	1.289
0	1.305
0	1.321
0	1.338
0	1.355
0	1.37
0	1.386
0	1.402
0	1.417
0	1.433
0	1.449
0	1.465
0	1.482
0	1.498
0	1.515
0	1.531
0	1.548
0	1.564
0	1.58
0	1.595
0	1.611
0	1.626
0	1.642
0	1.658
0	1.675
0	1.691
0	1.707
0	1.724
0	1.74
0	1.757
0	1.773
0	1.788
0	1.804
0	1.819
0	1.836
0	1.852
0	1.868
0	1.884
0	1.901
0	1.917
0	1.934
0	1.95
0	1.966
0	1.982
0	1.998
0	2.014
0	2.03
0	2.046
0	2.062
0	2.079
0	2.095
0	2.111
0	2.128
0	2.133
0	2.133
0	2.133
0	2.133
0	2.133
0	2.133
0	2.133
0	2.133
0	2.133
0	2.133
0	2.133
0	2.133
0	2.133
0	2.133
0	2.133
0	2.133
0	2.133
0	2.133
0	2.133
0	2.133
0	2.133
0	2.133
0	2.133
0	2.133
0	2.133
0	2.133
0	2.133
0	2.133
0	2.133
0	2.133
0	2.133
0	2.133
0	2.133
0	2.133
0	2.133
0	2.133
0	2.133
0	2.133
0	2.133
0	2.133
0	2.133
0	2.133
0	2.133
0	2.133
0	2.133
0	2.133
0	2.133
0	2.133
0	2.133
0	2.133
0	2.133
0	2.133
0	2.133
0	2.133
0	2.133
0	2.133
0	2.133
0	2.133
0	2.133
0	2.133
0	2.133
0	2.133
0	2.133
0	2.133
0	2.133
0	2.133
0	2.133
0	2.133
0	2.133
0	2.133
0	2.133
0	2.133
0	2.133
0	2.133
0	2.133
0	2.133
0	2.133

## Sheet: bending-ambu003
force	displacement
0	0
0.01	0.016
0.03	0.033
0.04	0.049
0.06	0.065
0.08	0.081
0.09	0.096
0.11	0.112
0.12	0.128
0.13	0.144
0.15	0.16
0.17	0.177
0.18	0.193
0.19	0.21
0.21	0.226
0.22	0.243
0.24	0.259
0.25	0.275
0.26	0.291
0.28	0.306
0.29	0.322
0.31	0.338
0.32	0.354
0.33	0.371
0.35	0.388
0.36	0.404
0.38	0.421
0.39	0.438
0.4	0.454
0.42	0.47
0.43	0.485
0.44	0.501
0.45	0.517
0.47	0.533
0.48	0.549
0.5	0.565
0.51	0.582
0.52	0.598
0.53	0.615
0.54	0.631
0.55	0.647
0.57	0.663
0.58	0.679
0.59	0.694
0.6	0.71
0.61	0.726
0.63	0.742
0.64	0.759
0.65	0.775
0.66	0.792
0.67	0.808
0.68	0.825
0.7	0.841
0.71	0.857
0.71	0.873
0.73	0.889
0.74	0.904
0.75	0.92
0.76	0.936
0.77	0.952
0.78	0.968
0.79	0.984
0.8	1.001
0.81	1.017
0.82	1.034
0.83	1.05
0.84	1.066
0.84	1.081
0.86	1.097
0.86	1.113
0.88	1.128
0.89	1.144
0.9	1.16
0.91	1.177
0.92	1.193
0.93	1.21
0.93	1.227
0.94	1.243
0.95	1.259
0.96	1.274
0.97	1.29
0.98	1.306
0.99	1.321
1	1.337
1	1.353
1.01	1.37
1.02	1.387
1.02	1.403
1.03	1.419
1.04	1.436
1.05	1.451
1.06	1.468
1.07	1.483
1.07	1.499
1.08	1.514
1.09	1.53
1.09	1.547
1.1	1.563
1.11	1.579
1.12	1.596
1.13	1.612
1.13	1.629
1.14	1.645
1.15	1.66
1.15	1.677
1.16	1.692
1.16	1.708
1.17	1.724
1.18	1.74
1.19	1.756
1.2	1.773
1.2	1.789
1.21	1.806
1.22	1.822
1.22	1.838
1.23	1.855
1.24	1.87
1.24	1.887
1.25	1.902
1.25	1.917
1.26	1.933
1.27	1.949
1.28	1.966
1.28	1.982
0.03	1.999
0	2.016
0	2.033
0	2.05
0	2.065
0	2.081
0	2.097
0	2.112
0	2.128
0	2.145
0	2.16
0	2.178
0	2.194
0	2.211
0	2.227
0	2.243
0	2.26
0	2.275
0	2.291
0	2.307
0	2.322
0	2.338
0	2.355
0	2.371
0	2.388
0	2.404
0	2.42
0	2.437
0	2.453
0	2.469
0	2.485
0	2.501
0	2.517
0	2.533
0	2.549
0	2.566
0	2.581
0	2.598
0	2.615
0	2.631
0	2.648
0	2.663
0	2.679
0	2.695
0	2.711
0	2.727
0	2.743
0	2.759
0	2.775
0	2.791
0	2.809
0	2.825
0	2.842
0	2.858
0	2.873
0	2.889
0	2.905
0	2.92
0	2.936
0	2.953
0	2.969
0	2.985
0	3.002
0	3.018
0	3.035
0	3.051
0	3.067
0	3.082
0	3.098
0	3.114
0	3.13
0	3.146
0	3.162
0	3.174
0	3.174
0	3.174
0	3.174
0	3.174
0	3.174
0	3.174
0	3.174
0	3.174
0	3.174
0	3.174
0	3.174
0	3.174
0	3.174
0	3.174
0	3.174
0	3.174
0	3.174
0	3.174
0	3.174
0	3.174
0	3.174
0	3.174
0	3.174

## Sheet: bending-ambu004
force	displacement
0	0
0.02	0.015
0.04	0.031
0.06	0.047
0.08	0.063
0.09	0.079
0.11	0.095
0.13	0.112
0.15	0.129
0.17	0.145
0.19	0.162
0.21	0.178
0.22	0.194
0.24	0.209
0.26	0.225
0.28	0.24
0.3	0.256
0.31	0.273
0.33	0.289
0.35	0.305
0.36	0.322
0.38	0.339
0.4	0.355
0.42	0.371
0.44	0.387
0.46	0.403
0.48	0.418
0.49	0.434
0.51	0.45
0.53	0.466
0.54	0.483
0.56	0.499
0.57	0.515
0.59	0.532
0.61	0.548
0.63	0.565
0.64	0.581
0.66	0.596
0.68	0.613
0.7	0.628
0.72	0.644
0.73	0.659
0.75	0.675
0.76	0.692
0.78	0.708
0.8	0.724
0.82	0.741
0.83	0.758
0.85	0.774
0.87	0.79
0.88	0.805
0.9	0.821
0.91	0.836
0.93	0.852
0.95	0.868
0.97	0.884
0.99	0.901
1	0.917
1.02	0.934
1.03	0.95
1.05	0.967
1.07	0.983
1.08	0.998
1.1	1.014
1.11	1.03
1.13	1.045
1.15	1.061
0.01	1.078
0	1.095
0	1.112
0	1.128
0	1.144
0	1.16
0	1.176
0	1.192
0	1.208
0	1.223
0	1.239
0	1.255
0	1.272
0	1.288
0	1.304
0	1.321
0	1.337
0	1.354
0	1.37
0	1.386
0	1.402
0	1.418
0	1.433
0	1.449
0	1.465
0	1.482
0	1.498
0	1.514
0	1.531
0	1.548
0	1.564
0	1.58
0	1.595
0	1.612
0	1.627
0	1.643
0	1.659
0	1.675
0	1.691
0	1.708
0	1.724
0	1.741
0	1.757
0	1.773
0	1.789
0	1.805
0	1.821
0	1.836
0	1.852
0	1.868
0	1.885
0	1.901
0	1.918
0	1.934
0	1.951
0	1.967
0	1.983
0	1.999
0	2.014
0	2.03
0	2.046
0	2.062
0	2.078
0	2.095
0	2.111
0	2.128
0	2.144
0	2.16
0	2.176
0	2.192
0	2.208
0	2.223
0	2.24
0	2.256
0	2.272
0	2.288
0	2.304
0	2.321
0	2.337
0	2.354
0	2.37
0	2.386
0	2.402
0	2.418
0	2.433
0	2.449
0	2.466
0	2.482
0	2.498
0	2.514
0	2.532
0	2.536
0	2.536
0	2.536
0	2.536
0	2.536
0	2.536
0	2.536
0	2.536
0	2.536
0	2.536
0	2.536
0	2.536
0	2.537
0	2.537
0	2.537
0	2.537
0	2.537
0	2.537
0	2.537
0	2.537
0	2.537
0	2.537
0	2.537
0	2.537
0	2.537
0	2.537
0	2.537
0	2.537
0	2.537
0	2.537
0	2.537
0	2.537
0	2.537
0	2.537
0	2.537
0	2.537
0	2.537
0	2.537
0	2.537
0	2.537
0	2.537
0	2.532
0	2.27
0	1.792
0	1.293
0	0.794
0	0.294
0	-0.206
0	-0.706
0	-1.205
0	-1.705
0	-2.204
0	-2.705
0	-3.204
0	-3.705
0	-4.204
0	-4.704
0	-5.204
0	-5.705
0	-6.204
0	-6.705
0	-7.204
0	-7.704
0	-8.204
0	-8.705
0	-9.204
0	-9.705
0	-10.205
0	-10.704
0	-11.204
-0.01	-11.705
0	-12.204
0	-12.705
0	-13.204
0	-13.704
0	-14.204
0	-14.705
0	-15.204
0	-15.705
0	-16.204
0	-16.592
0	-16.592
0	-16.592
0	-16.592
0	-16.592
0	-16.592
0	-16.592
0	-16.592
0	-16.592
0	-16.592
0	-16.592
0	-16.592
0	-16.592
0	-16.592
0	-16.592
0	-16.592
0	-16.592
0	-16.592
0	-16.592
0	-16.592
0	-16.592
0	-16.592
0	-16.592
0	-16.592
0	-16.592
0	-16.592
0	-16.592
0	-16.592
0	-16.592
0	-16.592
0	-16.592
0	-16.592
0	-16.592
0	-16.592
0	-16.592
0	-16.592
0	-16.592
0	-16.592
0	-16.592
0	-16.592
0	-16.592
0	-16.592
0	-16.592
0	-16.592
0	-16.592
0	-16.592
0	-16.592
0	-16.592
0	-16.592
0	-16.592
0	-16.592
0	-16.592
0	-16.592
0	-16.592
0	-16.592
0	-16.592
0	-16.592
0	-16.592
0	-16.592
0	-16.592
0	-16.592
0	-16.592
0	-16.592
-0.03	-16.592
-0.03	-16.592
0	-16.592
-0.02	-16.592
0	-16.592
0	-16.592
0	-16.592
0	-16.592
-0.03	-16.592
0	-16.592
0	-16.592
0	-16.592
0	-16.592
0	-16.592
0	-16.592
0	-16.592
0	-16.592
-0.01	-16.592
-0.09	-16.591
0.02	-16.591
0	-16.591
0	-16.591
0	-16.591
0.03	-16.591
0.02	-16.591
-0.06	-16.591
0.04	-16.591
-0.04	-16.591
0	-16.591
0	-16.591
0	-16.591
0	-16.591
0	-16.591
0	-16.591
0	-16.592
0	-16.592
0	-16.592
0	-16.592
0	-16.592
0	-16.592
0	-16.592
-0.04	-16.592
0	-16.592
0	-16.592
0	-16.592
0	-16.592
0	-16.592
0	-16.592
0	-16.592
0	-16.592
0	-16.592
0	-16.592
0	-16.592
0	-16.592
0	-16.592
0	-16.592
0	-16.592
0	-16.592
0	-16.592
0	-16.592
0	-16.592
0	-16.592
0	-16.592
0	-2.842
0	-2.842
0	-2.842
0	-2.842
0	-2.842
0	-2.842
0	-2.842
0	-2.842
0	-2.842
0	-2.842
0	-2.842
0	-2.842
0	-2.842
0	-2.842
0	-2.842
0	-2.842
0	-2.842
0	-2.842
0	-2.842
0	-2.842
0	-2.842
0	-2.842
0	-2.842
0	-2.842
0	-2.842
0	-2.842
0	-2.842
0	-2.842
0	-2.842
0	-2.842
0	-2.842
0	-2.842
0	-2.842
0	-2.842
0	-2.842
0	-2.842
0	-2.842
0	-2.842
0	-2.842
0	-2.842
0	-2.842
0	-2.842
0	-2.842
0	-2.842
0	-2.842
0	-2.842
0	-2.842
0	-2.842
0	-2.842
0	-2.842
0	-2.842
0	-2.842
0	-2.842
0	-2.842
0	-2.842
0	-2.842
0	-2.842
0	-2.842
0	-2.842
0	-2.842
0	-2.842
0	-2.842
0	-2.842
0	-2.842
0	-2.842
0	-2.842
0	-2.842
0	-2.842
0	-2.842
0	-2.842
0	-2.842
0	-2.842
0	-2.842
0	-2.842
0	-2.842
0	-2.842
0	-2.842
0	-2.842
0	-2.842
0	-2.842
0	-2.842
0	-2.842
0	-2.842
0	-2.842
0	-2.842
0	-2.842
0	-2.842
0	-2.842
0	-2.842
0	-2.842
0	-2.842
0	-2.842
0	-2.842

## Sheet: bending-ambu005
force	displacement
0	0
0.03	0.015
0.05	0.031
0.06	0.047
0.09	0.063
0.11	0.08
0.12	0.096
0.15	0.113
0.17	0.129
0.19	0.145
0.21	0.162
0.23	0.177
0.25	0.193
0.27	0.209
0.29	0.225
0.31	0.24
0.33	0.257
0.35	0.273
0.37	0.29
0.39	0.306
0.41	0.322
0.43	0.339
0.45	0.355
0.47	0.372
0.49	0.387
0.51	0.403
0.53	0.419
0.55	0.435
0.57	0.451
0.59	0.467
0.61	0.483
0.63	0.5
0.65	0.516
0.66	0.533
0.68	0.55
0.7	0.565
0.73	0.582
0.74	0.597
0.76	0.613
0.78	0.628
0.8	0.644
0.82	0.661
0.84	0.677
0.86	0.693
0.87	0.71
0.9	0.726
0.91	0.743
0.94	0.759
0.95	0.774
0.97	0.791
0.98	0.806
1.01	0.822
1.02	0.838
1.04	0.854
1.06	0.871
1.08	0.887
1.09	0.903
1.11	0.92
1.12	0.936
1.14	0.953
1.15	0.969
1.17	0.984
1.19	1.001
1.2	1.016
1.22	1.032
1.23	1.047
1.25	1.063
1.26	1.08
1.27	1.096
1.29	1.112
1.31	1.129
1.32	1.145
1.34	1.161
1.35	1.177
1.37	1.193
1.38	1.209
1.39	1.224
1.41	1.24
1.42	1.256
1.44	1.271
1.45	1.288
1.47	1.304
1.49	1.32
-0.06	1.337
0	1.354
0	1.37
0	1.386
0	1.402
0	1.418
0	1.433
0	1.449
0	1.466
0	1.481
0	1.499
0	1.515
0	1.531
0	1.547
0	1.563
0	1.579
0	1.595
0	1.611
0	1.626
0	1.642
0	1.659
0	1.675
0	1.691
0	1.708
0	1.725
0	1.741
0	1.757
0	1.773
0	1.789
0	1.805
0	1.821
0	1.837
0	1.853
0	1.869
0	1.886
0	1.902
0	1.919
0	1.935
0	1.951
0	1.968
0	1.983
0	2
0	2.015
0	2.03
0	2.046
0	2.062
0	2.079
0	2.095
0	2.112
0	2.129
0	2.145
0	2.161
0	2.177
0	2.193
0	2.209
0	2.224
0	2.24
0	2.256
0	2.272
0	2.289
0	2.306
0	2.323
0	2.339
0	2.356
0	2.372
0	2.387
0	2.402
0	2.419
0	2.434
-0.01	2.451
0	2.467
0	2.483
0	2.5
0	2.516
0	2.532
0	2.549
0	2.565
0	2.581
0	2.597
0	2.612
0	2.628
0	2.644
0	2.66
0	2.677
0	2.693
0	2.709
0	2.726
0.01	2.742
0	2.743
0	2.743
0	2.743
0	2.743
0	2.743
0	2.743
0	2.743
0	2.743
0	2.743
0	2.743
0	2.743
0	2.743
0	2.743
0	2.743
0	2.743
0	2.743
0	2.743
0	2.743
0	2.743
0	2.743
0	2.743
0	2.744
0	2.744
0	2.744
0	2.744
0	2.744
0	2.744
0	2.744

## Sheet: bending-ambu006
force	displacement
0	0
0.01	0.015
0.03	0.032
0.05	0.048
0.07	0.065
0.09	0.081
0.12	0.097
0.14	0.113
0.16	0.129
0.18	0.144
0.2	0.16
0.22	0.176
0.24	0.192
0.27	0.209
0.29	0.225
0.31	0.242
0.33	0.258
0.35	0.275
0.37	0.291
0.39	0.307
0.41	0.323
0.43	0.339
0.45	0.355
0.48	0.37
0.49	0.386
0.52	0.403
0.54	0.419
0.56	0.436
0.58	0.453
0.6	0.469
0.62	0.485
0.65	0.502
0.66	0.517
0.69	0.533
0.71	0.548
0.72	0.564
0.74	0.58
0.76	0.596
0.78	0.613
0.8	0.629
0.83	0.646
0.84	0.662
0.86	0.678
0.88	0.695
0.9	0.711
0.92	0.726
0.94	0.742
0.96	0.758
0.99	0.774
1.01	0.79
1.02	0.806
1.04	0.823
1.06	0.839
1.08	0.856
1.11	0.872
1.12	0.888
1.14	0.904
1.16	0.92
1.18	0.936
1.2	0.952
1.22	0.967
1.23	0.983
1.25	1
1.27	1.015
1.29	1.032
0	1.049
0	1.066
0	1.082
0	1.098
0	1.114
0	1.13
0	1.145
0	1.161
0	1.177
0	1.193
0	1.21
0	1.226
0	1.243
0	1.259
0	1.276
0	1.292
0	1.308
0	1.323
0	1.339
0	1.355
0	1.371
0	1.387
0	1.403
0	1.42
0	1.436
0	1.452
0	1.469
0	1.485
0	1.501
0	1.517
0	1.533
0	1.548
0	1.564
0	1.58
0	1.596
0	1.613
0	1.629
0	1.645
0	1.662
0	1.678
0	1.694
0	1.711
0	1.726
0	1.742
0	1.758
0	1.774
0	1.79
0	1.806
0	1.822
0.01	1.839
0	1.84
-0.01	1.84
0	1.84
-0.05	1.84
0	1.84
0	1.84
0	1.84
0	1.84
0	1.84
0	1.84
0	1.84
0	1.84
0	1.84
0	1.84
0	1.84
0	1.84
0	1.84
0	1.84
0	1.84
0	1.84
0	1.84
0	1.84
0	1.84

## Sheet: bending-ambu007
force	displacement
0	0
0.01	0.016
0.04	0.032
0.07	0.048
0.1	0.065
0.12	0.081
0.15	0.098
0.18	0.115
0.2	0.131
0.22	0.147
0.25	0.162
0.27	0.178
0.3	0.194
0.32	0.21
0.35	0.226
0.37	0.243
0.4	0.259
0.42	0.276
0.45	0.292
0.47	0.309
0.5	0.325
0.52	0.34
0.55	0.356
0.58	0.372
0.6	0.388
0.62	0.403
0.65	0.419
0.67	0.436
0.69	0.452
0.72	0.469
0.75	0.486
0.77	0.502
0.8	0.518
0.82	0.534
0.85	0.55
0.87	0.566
0.89	0.581
0.91	0.597
0.94	0.613
0.96	0.629
0.99	0.646
1.01	0.662
1.04	0.679
1.06	0.695
1.08	0.712
1.11	0.728
1.13	0.744
1.15	0.759
1.18	0.775
1.2	0.791
1.23	0.807
1.25	0.823
1.27	0.839
1.3	0.855
1.32	0.871
1.34	0.888
1.37	0.904
1.39	0.921
1.42	0.937
1.44	0.952
1.46	0.968
1.48	0.984
1.5	0.999
-0.96	1.016
0	1.032
0	1.049
0	1.066
0	1.082
0	1.099
0	1.115
0	1.131
0	1.147
0	1.162
0	1.178
0	1.194
0	1.21
0	1.226
0	1.243
0	1.259
0	1.276
0	1.292
0	1.308
0	1.325
0	1.34
0	1.356
0	1.371
0	1.387
0	1.403
0	1.42
0	1.436
0	1.452
0	1.468
0.01	1.485
0.04	1.502
0.07	1.518
0.11	1.534
0.14	1.549
0.16	1.566
0.19	1.581
0.22	1.597
0.25	1.613
0.28	1.629
0.29	1.646
0.32	1.662
0.35	1.678
0.36	1.695
0.38	1.711
0.41	1.727
0.44	1.744
0.47	1.759
0.49	1.775
0.52	1.79
0.54	1.806
0.57	1.822
0.59	1.838
0.63	1.855
0.63	1.871
0.65	1.888
0.69	1.905
0.72	1.921
0.76	1.937
0.79	1.952
0.81	1.968
0.84	1.984
0.87	1.999
0.9	2.015
0.93	2.032
0.96	2.048
0.99	2.065
1.01	2.081
0.98	2.098
1.01	2.114
1.03	2.13
1.06	2.145
1.09	2.161
1.12	2.176
1.13	2.192
1.15	2.208
1.18	2.224
1.19	2.241
1.2	2.256
1.22	2.273
1.25	2.289
1.26	2.305
1.28	2.321
1.3	2.336
1.33	2.352
1.33	2.362
1.32	2.362
1.31	2.362
1.31	2.362
1.3	2.362
1.3	2.362
1.3	2.362
1.3	2.362
1.3	2.362
1.3	2.362
1.3	2.362
1.3	2.362
1.3	2.362
1.29	2.362
1.29	2.362
1.29	2.362
1.29	2.362
1.29	2.362
1.29	2.362
1.29	2.362
1.29	2.362
1.29	2.362
1.28	2.362
1.28	2.362
1.28	2.362
1.28	2.362
1.28	2.362
1.28	2.362
1.28	2.362
1.28	2.362
1.28	2.362
1.28	2.362
1.28	2.362
1.28	2.362
1.28	2.362
1.28	2.362
1.27	2.362
1.27	2.362
1.27	2.362
1.27	2.362
1.27	2.362
1.27	2.362
1.27	2.362
1.27	2.362
1.27	2.362
1.27	2.362
1.27	2.362
1.27	2.362
1.27	2.362
1.27	2.362
1.27	2.362
1.27	2.362
1.27	2.362
1.26	2.362
1.26	2.362

## Sheet: bending-ambu008
force	displacement
0	0
0.01	0.017
0.02	0.033
0.03	0.049
0.05	0.064
0.07	0.08
0.07	0.096
0.09	0.112
0.1	0.128
0.11	0.144
0.13	0.161
0.14	0.177
0.15	0.193
0.16	0.21
0.18	0.226
0.19	0.242
0.2	0.258
0.21	0.273
0.22	0.29
0.23	0.305
0.25	0.321
0.26	0.338
0.28	0.354
0.29	0.371
0.3	0.387
0.31	0.404
0.32	0.42
0.33	0.436
0.35	0.452
0.36	0.468
0.37	0.483
0.38	0.499
0.39	0.515
0.4	0.531
0.41	0.548
0.42	0.564
0.44	0.581
0.44	0.598
0.46	0.614
0.47	0.63
0.48	0.646
0.49	0.662
0.5	0.677
0.51	0.693
0.52	0.709
0.53	0.725
0.55	0.742
0.56	0.758
0.57	0.775
0.58	0.791
0.59	0.808
0.6	0.824
0.61	0.84
0.63	0.855
0.63	0.871
0.64	0.887
0.65	0.903
0.66	0.919
0.68	0.936
0.69	0.952
0.69	0.968
0.71	0.985
0.72	1.001
0.73	1.018
0.74	1.033
0.75	1.05
0.76	1.065
0.77	1.081
0.78	1.097
0.79	1.113
-0.01	1.129
0	1.146
0	1.162
0	1.178
0	1.195
0	1.211
0	1.228
0	1.243
0	1.259
0	1.275
0	1.291
0	1.306
0	1.322
0	1.338
0	1.355
0	1.371
0	1.388
0	1.404
0	1.421
0	1.437
0	1.452
0	1.468
0	1.483
0	1.499
0	1.515
0	1.531
0	1.548
0	1.564
0	1.581
0	1.597
0	1.614
0	1.63
0	1.646
0	1.661
0	1.677
0	1.693
0	1.709
0	1.725
0	1.741
0	1.758
0	1.774
0	1.791
0	1.807
0	1.823
0	1.839
0	1.855
0	1.871
0	1.887
0	1.902
0	1.919
0	1.935
0	1.951
0	1.968
0	1.984
0	2.001
0	2.017
0.02	2.033
0.04	2.049
0.06	2.065
0.08	2.08
0.1	2.096
0.11	2.112
0.13	2.128
0.14	2.145
0.16	2.161
0.17	2.177
0.19	2.194
0.21	2.211
0.22	2.227
0.24	2.242
0.25	2.258
0.27	2.274
0.28	2.29
0.3	2.305
0.31	2.321
0.32	2.338
0.34	2.354
0.35	2.371
0.36	2.387
0.37	2.404
0.39	2.42
0.41	2.436
0.43	2.451
0.42	2.453
0.42	2.453
0.41	2.453
0.41	2.453
0.41	2.453
0.41	2.453
0.41	2.453
0.41	2.453
0.41	2.453
0.41	2.453
0.41	2.453
0.4	2.453
0.4	2.453
0.4	2.453
0.4	2.453
0.4	2.453
0.4	2.453
0.48	2.453
0.4	2.453
0.4	2.453
0.4	2.453
0.4	2.453
0.4	2.453
0.4	2.453
0.4	2.453
0.4	2.453
0.4	2.453
0.4	2.453
0.4	2.453
0.4	2.453
0.39	2.453
0.39	2.453
0.39	2.453
0.39	2.453
0.39	2.453
0.39	2.453
0.39	2.453
0.39	2.453
0.39	2.453
0.39	2.453
0.39	2.453
0.39	2.453
0.39	2.453
0.39	2.453
0.39	2.453
0.39	2.453
0.39	2.453
0.39	2.453
0.39	2.453
0.39	2.453
0.39	2.453
0.39	2.453
0.39	2.453
0.39	2.453
0.39	2.453
0.39	2.453
0.39	2.453
0.39	2.453
0.39	2.453
0.39	2.453
0.39	2.453
0.39	2.453
0.39	2.453
0.39	2.453
0.39	2.453
0.39	2.453
0.39	2.453
0.39	2.453
0.38	2.453
0.38	2.453
0.38	2.453
0.38	2.453
0.38	2.453
0.38	2.453
0.38	2.453
0.38	2.453
0.38	2.453
0.38	2.453
0.38	2.453
0.38	2.453
0.38	2.453
0.38	2.453
0.38	2.453
0.38	2.453
0.38	2.453
0.38	2.453
0.38	2.453
0.38	2.453
0.38	2.453
0.36	2.433
0	2.118
0	1.633
0	1.133
0	0.634
0	0.132
0	-0.366
0	-0.867
0	-1.365
0	-1.868
0	-2.366
0	-2.868
0	-3.366
0	-3.867
0	-4.365
0	-4.867
0	-5.366
0	-5.868
0	-6.366
0	-6.867
0	-7.365
0	-7.867
0	-8.366
0	-8.868
0	-9.366
0	-9.867
0	-10.365
0	-10.867
0	-11.366
0	-11.867
0	-12.366
0	-12.867
0	-13.365
0	-13.867
0	-14.366
0	-14.626
0	-14.626
0	-14.626
0	-14.626
0	-14.626
0	-14.626
0	-14.626
0	-14.626
0	-14.626
0	-14.626
0	-14.626
0	-14.626
0	-14.626
0	-14.626
0	-14.626
0	-14.626
0	-14.626
0	-14.626
0	-14.626
0	-14.626
0	-14.626
0	-14.626
0	-14.626
0	-14.626
0	-14.626
0	-14.626
0	-14.626
0	-14.626
0	-14.626
0	-14.626
0	-14.626

## Sheet: bending-ambu009
force	displacement
0	0
0.02	0.017
0.03	0.033
0.05	0.049
0.08	0.065
0.1	0.081
0.11	0.097
0.13	0.112
0.15	0.128
0.18	0.144
0.19	0.16
0.21	0.177
0.23	0.193
0.25	0.21
0.27	0.226
0.29	0.242
0.31	0.258
0.33	0.274
0.35	0.29
0.37	0.306
0.38	0.322
0.4	0.337
0.42	0.354
0.44	0.37
0.46	0.387
0.47	0.403
0.49	0.42
0.51	0.436
0.53	0.452
0.55	0.468
0.57	0.484
0.59	0.5
0.61	0.515
0.62	0.531
0.65	0.548
0.66	0.564
0.68	0.58
0.69	0.597
0.71	0.614
0.73	0.63
0.74	0.646
0.76	0.662
0.78	0.678
0.79	0.693
0.81	0.709
0.83	0.725
0.84	0.741
0.86	0.758
0.88	0.774
0.89	0.79
0.91	0.807
0.92	0.824
0.93	0.84
0.95	0.856
0.97	0.871
0.98	0.887
1	0.903
1.01	0.919
1.03	0.935
1.04	0.951
1.06	0.968
1.08	0.984
1.09	1.001
1.11	1.017
1.13	1.033
1.14	1.049
1.15	1.065
1.17	1.081
1.19	1.097
1.21	1.113
1.22	1.128
1.23	1.145
1.25	1.161
1.26	1.177
1.28	1.193
1.29	1.21
0.04	1.228
0	1.244
0	1.26
0	1.275
0	1.291
0	1.307
0	1.322
0	1.338
0	1.355
0	1.371
0	1.388
0	1.404
0	1.421
0	1.437
0	1.453
0	1.469
0	1.484
0	1.5
0	1.516
0	1.531
0	1.548
0	1.564
0	1.58
0	1.597
0	1.613
0	1.63
0	1.646
0	1.662
0	1.678
0	1.693
0	1.709
0	1.725
0	1.741
0	1.758
0	1.774
0	1.79
0	1.807
0	1.823
0	1.839
0	1.856
0	1.871
0	1.888
0	1.903
0	1.919
0	1.935
0	1.951
0	1.968
0	1.984
0	2
0	2.017
0	2.034
0	2.05
0	2.066
0	2.081
0	2.097
0	2.113
0	2.129
0	2.145
0	2.161
0	2.177
0	2.194
0	2.21
0	2.219
0	2.219
0	2.219
0	2.219
0	2.219
0	2.219
0	2.219
0	2.219
0	2.219
0	2.219
0	2.219
0	2.219
0	2.219
0	2.219
0	2.219
0	2.219
0	2.219
0	2.219
0	2.219
0	2.219
0	2.219
0	2.219
-0.01	2.219
0	2.219
0	2.219
0	2.219
0	2.219
0	2.219
0	2.219
0	2.219
0	2.219
0	2.219
0	2.219
0	2.219
0	2.219
0	2.219
0	2.219
0	2.219
0	2.219
0	2.219
0	2.219
0	2.219
0	2.219
0	2.219
0	2.219
0	2.219
0	2.219
0	2.076
0	1.629
0	1.13
0	0.632
0	0.13
-0.01	-0.368
0	-0.87
0	-1.368
0	-1.87
-0.01	-2.368
0	-2.87
0	-3.367
0	-3.869
0	-4.367
0	-4.869
0	-5.368
0	-5.869
0	-6.368
-0.01	-6.869
0	-7.367
0	-7.869
0	-8.368
0	-8.87
0	-9.367
0	-9.869
-0.01	-10.367
0	-10.869
0	-11.368
0	-11.869
-0.01	-12.367
0	-12.869
0	-13.366
0	-13.869
0	-14.367
0	-14.869
0	-15.367
0	-15.868
0	-16.366
0	-16.869
0	-17.367
0	-17.869
0	-18.367
0	-18.868
0	-19.366
0	-19.868
0	-20.367
0	-20.869
0	-21.367
0	-21.868
0	-22.366
0	-22.868
0	-23.367
0	-23.869
0	-24.367
0	-24.868
0	-25.366
0	-25.868
0	-26.367
0	-26.869
0	-27.367
0	-27.868
0	-28.366
0	-28.869
0	-29.367
0	-29.869
0	-30.367
0	-30.479
0	-30.479
0	-30.479
0	-30.479
0	-30.479
0	-30.479
0	-30.479
0	-30.479
0	-30.479
0	-30.479
0	-30.479
0	-30.479
0	-30.479
0	-30.479
0	-30.479
0	-30.479
0	-30.479
0	-30.479
0	-30.479
0	-30.479
0	-30.479
0	-30.479
0	-30.479
0	-30.479
	-1.454
	-1.454
	-1.454
	-1.454
	-1.454
	-1.454
	-1.454
	-1.454
	-1.454
	-1.454
	-1.454
	-1.454
	-1.454
	-1.454
	-1.454
	-1.454
	-1.454
	-1.454
	-1.454
	-1.454
	-1.454
	-1.454
	-1.454
	-1.454
	-1.454
	-1.454
	-1.454
	-1.454
	-1.454
	-1.454
	-1.454
	-1.454
	-1.454
	-1.454
	-1.454
	-1.454
	-1.454
	-1.454
	-1.454
	-1.454
	-1.454
	-1.454
	-1.454
	-1.454
	-1.454
	-1.454
	-1.454
	-1.454
	-1.454
	-1.454
	-1.454
	-1.454
	-1.454
	-1.454
	-1.454
	-1.454
	-1.454
	-1.454
	-1.454
	-1.454
	-1.454
	-1.454
	-1.454
	-1.454
	-1.454
	-1.454
	-1.454
	-1.454
	-1.454
	-1.454
	-1.454
	-1.454
	-1.454
	-1.454
	-1.454
	-1.454
	-1.454
	-1.454
	-1.454
	-1.454
	-1.454
	-1.454
	-1.454
	-1.454
	-1.454
	-1.454
	-1.454
	-1.454
	-1.454
	-1.454
	-1.454
	-1.454
	-1.454
	-1.454
	-1.454
	-1.454
	-1.454
	-1.454
	-1.454
	-1.454
	-1.454
	-1.454
	-1.454
	-1.454
	-1.454
	-1.454
	-1.454
	-1.454
	-1.454
	-1.454
	-1.454

## Sheet: bending-ambu010
force	displacement
0	0
0.01	0.016
0.03	0.032
0.05	0.049
0.07	0.065
0.08	0.082
0.1	0.098
0.12	0.114
0.14	0.13
0.16	0.146
0.17	0.161
0.19	0.177
0.21	0.193
0.23	0.21
0.24	0.226
0.26	0.242
0.28	0.259
0.29	0.276
0.31	0.292
0.33	0.308
0.35	0.324
0.36	0.34
0.38	0.355
0.39	0.371
0.41	0.387
0.43	0.403
0.45	0.42
0.46	0.436
0.48	0.452
0.5	0.469
0.51	0.485
0.53	0.501
0.55	0.518
0.56	0.533
0.58	0.549
0.59	0.564
0.61	0.58
0.62	0.596
0.64	0.612
0.65	0.629
0.67	0.646
0.69	0.662
0.7	0.679
0.71	0.695
0.73	0.712
0.75	0.728
0.76	0.743
0.77	0.759
0.79	0.774
0.8	0.79
0.82	0.807
0.83	0.823
0.85	0.84
0.87	0.856
0.88	0.873
0.9	0.889
0.91	0.905
0.93	0.921
0.94	0.937
0.95	0.952
0.97	0.968
0.98	0.984
0.99	1
1.01	1.017
1.02	1.033
1.04	1.05
1.05	1.066
1.06	1.083
1.08	1.099
1.09	1.115
1.11	1.131
1.12	1.146
1.13	1.162
1.15	1.178
1.16	1.194
1.17	1.211
1.19	1.227
1.2	1.243
1.21	1.26
1.22	1.276
1.24	1.293
0.53	1.309
0	1.325
0	1.341
0	1.357
0	1.373
-0.01	1.389
-0.01	1.405
0	1.421
0	1.438
0	1.453
0	1.47
0	1.487
0	1.503
0	1.519
0	1.534
0	1.55
0	1.566
0	1.582
0	1.597
0	1.614
0	1.63
0	1.647
0	1.663
0	1.679
0	1.696
0	1.712
0	1.728
0	1.743
0	1.759
0	1.775
0	1.791
0	1.807
0	1.823
0	1.84
0	1.856
0	1.873
0	1.889
0	1.905
0	1.921
0	1.937
0	1.952
0	1.968
0	1.984
0	2
-0.01	2.017
0	2.033
0	2.05
0	2.066
0	2.082
0	2.098
0	2.115
-0.01	2.131
0	2.147
0	2.162
0	2.178
0	2.194
0.01	2.203
0	2.203
0	2.203
0	2.203
0	2.203
0	2.203
0	2.203
0	2.203
0	2.203
0	2.203
0	2.203
0	2.203
0	2.203
0	2.203
0	2.203
0	2.203
0	2.203
0	2.203
0	2.203
0	2.203
0	2.203
