# Supplementary material for: Mechanical and chemical element structures of sea urchin spines: specialization in ambulacral and interambulacral areas
Source: PeerJ journal article supplement (doi:10.7717/peerj-matsci.38), 2025-07-30
Supplement: bending_testinterambu.xlsx [file bending_testinterambu.xlsx]

## Sheet: bending-interambu001
force	displacement
0	0
0.01	0.016
0.03	0.033
0.04	0.049
0.06	0.065
0.07	0.08
0.08	0.096
0.1	0.112
0.11	0.128
0.13	0.144
0.14	0.161
0.15	0.177
0.16	0.193
0.18	0.209
0.19	0.226
0.2	0.242
0.22	0.258
0.23	0.274
0.25	0.289
0.26	0.305
0.27	0.321
0.29	0.337
0.3	0.353
0.31	0.37
0.32	0.387
0.34	0.403
0.35	0.419
0.36	0.436
0.38	0.453
0.39	0.468
0.4	0.484
0.42	0.499
0.43	0.515
0.44	0.531
0.46	0.547
0.47	0.564
0.48	0.581
0.5	0.597
0.5	0.614
0.52	0.63
0.53	0.647
0.55	0.663
0.56	0.678
0.57	0.694
0.59	0.709
0.6	0.725
0.61	0.741
0.62	0.757
0.63	0.774
0.64	0.79
0.65	0.807
0.67	0.824
0.68	0.84
0.69	0.856
0.7	0.871
0.71	0.887
0.73	0.903
0.74	0.919
0.75	0.935
0.76	0.952
0.77	0.968
0.79	0.984
0.8	1
0.81	1.017
0.82	1.033
0.83	1.049
0.84	1.065
0.86	1.081
0.86	1.097
0.88	1.113
0.89	1.128
0.9	1.145
0.91	1.161
0.92	1.177
0.93	1.193
0.95	1.21
0.95	1.226
0.97	1.243
0.98	1.258
0.99	1.274
1	1.29
1.01	1.306
1.02	1.321
1.03	1.337
1.04	1.353
1.06	1.37
1.07	1.386
0	1.403
0	1.42
0	1.437
0	1.453
0	1.468
0	1.484
0	1.499
0	1.515
0	1.531
0	1.547
0	1.564
0	1.58
0	1.597
0.03	1.613
0.04	1.63
0.06	1.646
0.08	1.662
0.09	1.677
0.11	1.693
0.13	1.708
0.15	1.725
0.16	1.741
0.17	1.757
0.2	1.773
0.21	1.79
0.23	1.806
0.24	1.823
0.26	1.838
0.27	1.855
0.29	1.871
0.3	1.886
0.32	1.902
0.34	1.918
0.35	1.934
0.36	1.95
0.38	1.966
0.39	1.983
0.41	1.999
0.41	2.012
0.41	2.012
0.41	2.012
0.41	2.012
0.41	2.012
0.41	2.012
0.41	2.012
0.41	2.012
0.41	2.012
0.41	2.012
0.41	2.012
0.41	2.012
0.41	2.012
0.41	2.012
0.41	2.012
0.41	2.012
0.4	2.012
0.4	2.012
0.4	2.012
0.4	2.012
0.4	2.012
0.4	2.012
0.4	2.012
0.4	2.012
0.4	2.012
0.4	2.012
0.4	2.012
0.4	2.012
0.4	2.012
0.4	2.012
0.4	2.012
0.4	2.012
0.4	2.012
0.4	2.012
0.4	2.012
0.4	2.012
0.4	2.012
0.4	2.012
0.28	1.891
0	1.456
0	0.959
0	0.46
0	-0.041
0	-0.54
0	-1.039
0	-1.539
0	-2.04
0	-2.538
0	-3.039
0	-3.538
0	-4.039
0	-4.538
0	-5.04
0	-5.538
0	-6.039
0	-6.539
0	-6.787
0	-6.787
0	-6.787
0	-6.787
0	-6.787
0	-6.787
0	-6.787
0	-6.787
0	-6.787
0	-6.787
0	-6.787
0	-6.787
0	-6.787
0	-6.787
0	-6.787
0	-6.787
0	-6.787
0	-6.787
0	-6.787
0	-6.787
0	-6.787
0	-6.787
0	-6.787
0	-6.787
0	-6.787
0	-6.787
0	-6.787
0	-6.787
0	-6.787

## Sheet: bending-interambu002
force	displacement
0	0
0.01	0.016
0.03	0.032
0.04	0.048
0.05	0.063
0.06	0.079
0.07	0.095
0.08	0.111
0.09	0.128
0.11	0.144
0.11	0.161
0.12	0.177
0.14	0.194
0.15	0.21
0.16	0.226
0.17	0.242
0.18	0.258
0.19	0.273
0.2	0.289
0.21	0.305
0.22	0.321
0.23	0.338
0.24	0.354
0.25	0.371
0.27	0.387
0.27	0.403
0.28	0.42
0.29	0.435
0.3	0.451
0.31	0.467
0.33	0.483
0.33	0.498
0.34	0.514
0.35	0.531
0.36	0.548
0.37	0.564
0.39	0.58
0.39	0.597
0.4	0.613
0.41	0.63
0.42	0.645
0.44	0.661
0.44	0.677
0.46	0.693
0.46	0.709
0.47	0.725
0.49	0.741
0.49	0.758
0.5	0.775
0.51	0.791
0.52	0.808
0.53	0.824
0.54	0.84
0.55	0.855
0.56	0.871
0.57	0.886
0.58	0.902
0.59	0.919
0.6	0.935
0.61	0.952
0.62	0.968
0.62	0.985
0.64	1.001
0.65	1.017
0.65	1.033
0.66	1.049
0.67	1.065
0.68	1.08
0.69	1.096
0.7	1.112
0.71	1.129
0.71	1.145
0.72	1.162
0.73	1.178
0.74	1.195
0.75	1.211
0.76	1.227
0.76	1.243
0.77	1.259
0.78	1.274
0.79	1.29
0.8	1.306
0.81	1.322
0.82	1.339
0.83	1.355
0.83	1.371
0.84	1.388
0.85	1.404
0.86	1.421
0.87	1.436
0.87	1.452
0.88	1.468
0.89	1.483
0.9	1.499
0.9	1.515
0.91	1.531
0.92	1.548
0.93	1.564
0.94	1.581
0.95	1.597
0.95	1.613
0.96	1.629
0.97	1.645
0.98	1.661
0.99	1.676
0.99	1.692
1	1.708
1.01	1.724
1.02	1.74
1.03	1.757
1.03	1.773
1.04	1.79
1.05	1.806
1.06	1.822
1.06	1.838
1.07	1.854
1.08	1.869
1.09	1.885
1.1	1.901
1.11	1.918
1.12	1.934
1.12	1.95
1.13	1.967
1.13	1.983
1.14	2
1.15	2.016
1.16	2.031
1.17	2.048
0	2.064
0	2.08
0	2.096
0	2.111
0	2.128
0	2.144
0	2.16
0	2.177
0	2.194
0	2.21
0	2.227
0	2.242
0	2.258
0	2.274
0	2.289
0	2.305
0	2.321
0	2.338
0	2.354
0	2.371
0	2.387
0	2.404
0	2.42
0	2.436
0	2.451
0	2.468
0	2.483
0	2.499
0	2.515
0	2.531
0	2.548
0	2.564
0	2.581
0	2.598
0	2.614
0	2.63
0	2.646
0	2.661
0	2.677
0	2.693
0	2.709
0	2.725
0	2.741
0	2.758
0	2.774
0	2.791
0	2.807
0	2.823
0	2.839
0	2.855
0	2.871
0	2.886
0	2.903
0	2.919
0	2.935
0	2.951
0	2.968
0	2.984
0	3.001
0	3.017
0	3.033
0	3.049
0	3.065
0	3.071
0	3.071
-0.01	3.071
0	3.071
0	3.071
0	3.071
0	3.071
0	3.071
0	3.071
0	3.071
0	3.071
0	3.071
0	3.071
0	3.071
0	3.071
0	3.071
0	3.071
0	3.071
0	3.071
0	3.071
0	3.071
0	3.071
0	3.071
0	3.071

## Sheet: bending-interambu003
force	displacement
0	0
0.02	0.017
0.02	0.033
0.03	0.05
0.04	0.066
0.04	0.082
0.05	0.098
0.06	0.113
0.06	0.129
0.07	0.145
0.08	0.161
0.09	0.178
0.09	0.194
0.1	0.211
0.1	0.227
0.11	0.244
0.12	0.26
0.12	0.276
0.13	0.292
0.13	0.307
0.15	0.323
0.15	0.339
0.15	0.355
0.16	0.371
0.16	0.388
0.17	0.404
0.18	0.421
0.18	0.437
0.18	0.453
0.19	0.47
0.2	0.485
0.21	0.501
0.21	0.517
0.22	0.533
0.22	0.549
0.23	0.565
0.23	0.582
0.24	0.598
0.25	0.614
0.25	0.631
0.26	0.647
0.26	0.663
0.27	0.68
0.27	0.695
0.27	0.711
0.28	0.727
0.28	0.742
0.29	0.759
0.3	0.775
0.3	0.791
0.31	0.808
0.31	0.824
0.31	0.841
0.32	0.857
0.32	0.873
0.33	0.889
0.34	0.904
0.34	0.92
0.34	0.935
0.34	0.951
0.35	0.968
0.35	0.984
0.35	1
0.36	1.017
0.37	1.033
0.37	1.05
0.37	1.066
0.37	1.082
0.38	1.098
0.38	1.113
0.39	1.129
0.39	1.145
0.4	1.161
0.4	1.177
0.4	1.194
0.4	1.21
0.41	1.227
0.41	1.243
0.41	1.259
0.42	1.275
0.42	1.29
0.43	1.306
0.43	1.322
0.43	1.338
0.44	1.355
0.44	1.37
0.45	1.387
0.45	1.403
0.45	1.42
0.45	1.436
0.46	1.452
0.46	1.468
0.46	1.484
0.47	1.5
0.47	1.516
0.47	1.532
0.48	1.548
0.48	1.564
0.49	1.58
0.49	1.597
0.49	1.613
0.49	1.63
0.5	1.646
0.5	1.662
0.5	1.678
0.5	1.694
0.51	1.709
0.51	1.725
0.51	1.741
0.51	1.757
0.52	1.774
0.52	1.79
0.53	1.806
0.53	1.823
0.53	1.839
0.53	1.856
0.53	1.871
0.53	1.887
0.54	1.903
0.54	1.919
0.55	1.934
0.55	1.95
0.55	1.967
0.55	1.984
0.56	2
0.56	2.017
0.56	2.033
0.56	2.05
0.56	2.066
0.57	2.081
0.57	2.097
0.57	2.113
0.57	2.129
0.57	2.144
0.57	2.16
0.58	2.177
0.58	2.193
0.58	2.21
0.59	2.226
0.59	2.243
0.59	2.259
0.59	2.275
0.59	2.29
0.59	2.307
0.59	2.322
0.59	2.338
0.6	2.354
0.6	2.37
0.6	2.387
0.6	2.403
0.6	2.42
0.6	2.436
0.6	2.453
0.6	2.469
0.6	2.485
0.6	2.5
0.6	2.516
0.6	2.532
0.6	2.548
0.6	2.565
0.6	2.58
0.6	2.597
0.6	2.614
0.6	2.631
0.6	2.647
0.6	2.663
0.6	2.679
0.6	2.695
0.6	2.711
0.6	2.726
0.6	2.742
0.6	2.758
0.6	2.775
0.6	2.791
0.6	2.808
0.6	2.824
0.6	2.841
0.6	2.857
0.6	2.872
0.6	2.888
0.6	2.904
0.6	2.92
0.61	2.935
0.61	2.952
0.61	2.968
0.61	2.985
0.61	3.001
0.61	3.017
0.61	3.034
0.61	3.05
0.61	3.067
0.61	3.082
0.61	3.098
0.61	3.114
0.61	3.13
0.61	3.146
0.61	3.162
0.61	3.178
0.61	3.195
0.61	3.211
0.61	3.228
0.61	3.244
0.61	3.261
0.62	3.277
0.62	3.292
0.62	3.308
0.62	3.323
0.62	3.34
0.62	3.356
0.62	3.372
0.62	3.388
0.62	3.405
0.63	3.421
0.63	3.438
0.63	3.454
0.63	3.47
0.63	3.486
0.63	3.502
0.64	3.517
0.64	3.533
0.64	3.549
0.64	3.566
0.63	3.582
0.63	3.599
0.63	3.615
0.64	3.632
0.64	3.648
0.64	3.664
0.65	3.68
0.65	3.695
0.65	3.711
0.65	3.726
0.65	3.742
0.65	3.759
0.66	3.776
0.66	3.791
0.66	3.808
0.66	3.824
0.66	3.841
0.66	3.857
0.66	3.873
0.66	3.888
0.67	3.904
0.67	3.92
0.67	3.936
0.67	3.952
0.67	3.968
0.68	3.985
0.68	4.001
0.68	4.017
0.68	4.034
0.68	4.05
0.69	4.066
0.69	4.082
0.69	4.098
0.69	4.113
0.69	4.129
0.7	4.145
0.7	4.161
0.7	4.177
0.7	4.194
0.7	4.21
0.71	4.226
0.71	4.243
0.71	4.259
0.72	4.275
0.72	4.29
0.72	4.306
0.72	4.322
0.72	4.337
0.72	4.353
0.72	4.37
0.72	4.386
0.71	4.403
0.71	4.419
0.72	4.436
0.72	4.452
0.72	4.468
0.72	4.484
0.73	4.5
0.73	4.515
0.73	4.531
0.74	4.547
0.73	4.563
0.73	4.58
0.73	4.596
0.74	4.613
0.73	4.629
0.74	4.646
0.73	4.662
0.73	4.677
0.73	4.693
0.74	4.709
0.74	4.725
0.74	4.741
0.74	4.756
0.74	4.773
0.75	4.79
0.75	4.806
0.75	4.823
0.75	4.839
0.75	4.855
0.75	4.871
0.75	4.887
0.76	4.903
0.76	4.919
0.76	4.934
0.76	4.951
0.77	4.967
0.77	4.984
0.77	5
0.76	5.016
0.76	5.033
0.77	5.049
0.77	5.066
0.77	5.081
0.77	5.097
0.77	5.113
0.78	5.129
0.78	5.145
0.78	5.161
0.78	5.177
0.77	5.194
0.77	5.21
0.77	5.227
0.77	5.243
0.77	5.259
0.77	5.276
0.77	5.291
0.78	5.307
0.79	5.323
0.79	5.338
0.79	5.355
0.8	5.371
0.8	5.387
0.79	5.404
0.79	5.421
0.8	5.437
0.8	5.454
0.8	5.469
0.81	5.485
0.81	5.501
0.81	5.517
0.81	5.533
0.82	5.548
0.82	5.565
0.82	5.582
0.83	5.598
0.83	5.615
0.83	5.631
0.84	5.648
0.84	5.664
0.84	5.679
0.84	5.696
0.84	5.711
0.84	5.727
0.85	5.743
0.85	5.759
0.85	5.775
0.85	5.792
0.85	5.808
0.85	5.824
0.85	5.841
0.86	5.857
0.86	5.873
0.86	5.888
0	5.905
0	5.921
0	5.937
0	5.953
0	5.969
0	5.986
0	6.002
0	6.019
0	6.035
0	6.052
0	6.068
0	6.084
0	6.1
0	6.116
0.02	6.131
0.05	6.147
0.06	6.164
0.07	6.179
0.08	6.197
0.09	6.213
0.1	6.23
0.11	6.246
0.12	6.262
0.13	6.278
0.14	6.294
0.15	6.309
0.15	6.325
0.16	6.341
0.18	6.358
0.18	6.374
0.19	6.39
0.2	6.407
0.2	6.423
0.21	6.44
0.21	6.456
0.22	6.472
0.22	6.488
0.22	6.504
0.22	6.52
0.22	6.535
0.22	6.552
0.23	6.568
0.24	6.585
0.25	6.6
0.23	6.617
0.24	6.634
0.08	6.651
0.09	6.667
0.09	6.682
0.07	6.699
0.09	6.714
0.09	6.73
0.08	6.733
0.06	6.733
0.07	6.733
0.08	6.733
0.08	6.733
0.08	6.733
0.08	6.733
0.09	6.733
0.07	6.733
0.07	6.733
0.08	6.733
0.08	6.733
0.09	6.733
0.08	6.733
0.09	6.733
0.09	6.733
0.11	6.733
0.08	6.733
0.03	6.734
0.08	6.734
0.08	6.734
0.09	6.734
0.09	6.734
0.07	6.733
0.09	6.733
0.09	6.733
0.1	6.733
0.1	6.733
0.1	6.733
0.1	6.733
0.1	6.733
0.1	6.733
0.1	6.733
0.1	6.733
0.1	6.733
0.1	6.733
0.1	6.733
0.11	6.733
0.11	6.733
0.11	6.733
0.11	6.733
0.09	6.733
0.1	6.733
0.1	6.733
0.1	6.733
0.1	6.733
0.1	6.733
0.1	6.733
0.1	6.733
0.1	6.733
0.1	6.733
0.1	6.733
0.11	6.733
0.11	6.718

## Sheet: bending-interambu004
force	displacement
0	0
0.01	0.016
0.03	0.033
0.03	0.049
0.04	0.066
0.05	0.082
0.06	0.098
0.07	0.114
0.08	0.129
0.09	0.145
0.09	0.161
0.1	0.177
0.11	0.193
0.12	0.21
0.12	0.226
0.14	0.243
0.14	0.259
0.15	0.276
0.16	0.292
0.17	0.307
0.17	0.323
0.18	0.338
0.19	0.354
0.19	0.371
0.2	0.387
0.21	0.404
0.21	0.42
0.22	0.437
0.23	0.453
0.23	0.469
0.24	0.485
0.25	0.501
0.25	0.517
0.26	0.533
0.26	0.549
0.27	0.565
0.28	0.581
0.29	0.597
0.29	0.614
0.29	0.63
0.3	0.647
0.31	0.663
0.31	0.679
0.32	0.695
0.33	0.711
0.33	0.726
0.34	0.742
0.34	0.758
0.35	0.774
0.35	0.791
0.36	0.807
0.36	0.824
0.37	0.84
0.37	0.857
0.38	0.873
0.38	0.889
0.39	0.905
0.39	0.92
0.39	0.936
0.4	0.952
0.41	0.968
0.41	0.984
0.41	1.001
0.41	1.018
0.42	1.035
0.42	1.051
0.43	1.067
0.43	1.084
0.44	1.099
0.44	1.115
0.45	1.13
0.45	1.146
0.45	1.162
0.46	1.178
0.46	1.195
0.46	1.211
0.46	1.228
0.47	1.244
0.47	1.261
0.47	1.277
0.47	1.293
0.48	1.308
0.48	1.324
0.48	1.34
0.49	1.356
0.48	1.372
0.49	1.388
0.49	1.405
0.5	1.421
0.5	1.438
0.5	1.455
0.5	1.471
0.5	1.487
0.51	1.503
0.51	1.518
0.51	1.534
0.51	1.55
0.52	1.566
0.52	1.582
0.53	1.598
0.53	1.615
0.53	1.631
0.53	1.648
0.54	1.664
0.54	1.68
0.54	1.696
0.54	1.712
0.55	1.727
0.55	1.743
0.55	1.759
0.55	1.775
0.55	1.792
0.56	1.808
0.56	1.825
0.56	1.841
0.57	1.858
0.57	1.874
0.57	1.889
0.57	1.905
0.57	1.921
0.57	1.936
0.58	1.952
0.58	1.968
0.58	1.985
0.58	2.001
0.58	2.017
0.58	2.034
0.59	2.05
0.59	2.067
0.59	2.083
0.59	2.098
0.59	2.114
0.6	2.129
0.6	2.145
0.6	2.162
0.6	2.178
0.61	2.194
0.61	2.211
0.61	2.227
0.61	2.244
0.61	2.26
0.62	2.276
0.62	2.292
0.62	2.308
0.62	2.324
0.62	2.339
0.63	2.355
0.63	2.371
0.63	2.387
0.63	2.404
0.63	2.42
0.63	2.437
0.63	2.453
0.64	2.47
0.64	2.485
0.64	2.502
0.64	2.517
0.64	2.533
0.65	2.548
0.65	2.564
0.65	2.581
0.65	2.597
0.65	2.614
0.65	2.63
0.64	2.647
0.65	2.663
0.65	2.679
0.65	2.695
0.65	2.711
0.66	2.726
0.65	2.742
0.65	2.758
0.65	2.774
0.65	2.791
0.66	2.807
0.66	2.824
0.66	2.84
0.66	2.857
0.66	2.873
0.66	2.889
0.66	2.904
0.66	2.92
0.67	2.936
0.67	2.952
0.67	2.968
0.68	2.984
0.68	3.001
0.68	3.017
0.68	3.034
0.68	3.05
0.68	3.066
0.68	3.082
0.68	3.098
0.68	3.114
0.69	3.129
0.69	3.145
0.69	3.161
0.69	3.178
0.7	3.194
0.7	3.21
0.7	3.226
0.71	3.243
0.71	3.26
0.71	3.276
0.71	3.292
0.71	3.308
0.72	3.324
0.72	3.339
0.72	3.355
0.73	3.371
0.73	3.388
0.73	3.404
0.73	3.42
0.74	3.437
0.74	3.454
0.75	3.47
0.75	3.486
0.74	3.502
0.75	3.517
0.75	3.533
0.75	3.549
0.75	3.565
0.75	3.581
0.75	3.598
0.75	3.614
0.75	3.631
0.75	3.647
0.76	3.664
0.76	3.68
0.76	3.695
0.76	3.711
0.76	3.727
0.77	3.743
0.78	3.758
0.78	3.775
0.78	3.791
0.79	3.808
0.79	3.824
0.79	3.841
0.79	3.857
0.79	3.873
0.79	3.889
0.79	3.905
0.8	3.921
0.8	3.937
0.8	3.953
0.8	3.969
0.81	3.985
0.81	4.002
0.81	4.018
0.82	4.035
0.82	4.051
0.82	4.067
0.82	4.084
0.82	4.099
0.82	4.115
0.83	4.131
0.82	4.146
0.82	4.162
0.83	4.179
0.83	4.195
0.83	4.211
0.83	4.228
0.84	4.245
0.84	4.261
0.84	4.277
0.84	4.293
0.84	4.309
0.84	4.325
0.85	4.34
0.85	4.356
0.85	4.372
0.85	4.389
0.86	4.405
0.86	4.422
0.86	4.438
0.86	4.455
0.85	4.471
0.85	4.486
0.86	4.503
0.86	4.518
0.86	4.534
0.86	4.55
0.87	4.566
0.87	4.582
0.87	4.599
0.88	4.615
0.88	4.631
0.88	4.648
0.88	4.664
0.88	4.68
0.89	4.695
0.89	4.712
0.89	4.727
0.9	4.743
0.9	4.759
0.91	4.775
0.9	4.791
0.91	4.808
0.91	4.824
0.91	4.841
0.91	4.857
0.91	4.874
0.92	4.89
0.92	4.905
0.92	4.921
0.92	4.936
0.93	4.952
0.93	4.968
0.93	4.984
0.93	5.001
0.93	5.017
0.93	5.033
0.93	5.05
0.93	5.066
0.93	5.082
0.93	5.098
0.93	5.113
0.94	5.129
0.94	5.145
0.94	5.161
0.94	5.177
0.94	5.193
0.94	5.21
0.95	5.226
0.95	5.243
0.95	5.259
0.95	5.275
0.96	5.291
0.96	5.307
0.96	5.323
0.97	5.338
0.97	5.354
0.97	5.37
0.98	5.387
0.98	5.403
0.98	5.42
0.98	5.436
0.98	5.453
0.99	5.469
0.99	5.484
0.99	5.501
0.99	5.516
1	5.532
1	5.548
-0.02	5.564
0	5.581
0	5.597
0	5.614
0	5.63
0	5.647
0	5.663
0	5.68
0	5.695
0	5.711
0	5.727
0	5.743
0	5.759
0	5.775
0	5.792
0	5.808
0	5.825
0	5.841
0	5.858
0	5.874
0	5.89
0	5.906
0	5.922
0	5.938
0	5.954
0	5.97
0	5.985
0	6.002
0	6.019
0	6.035
0	6.052
0	6.068
0	6.084
0	6.1
0	6.115
0	6.131
0	6.147
0	6.163
0	6.179
0	6.195
0	6.212
0	6.229
0	6.245
0	6.262
0	6.278
0	6.294
0	6.309
0	6.325
0	6.341
0	6.357
0	6.371
0	6.372
0	6.372
0	6.372
0.01	6.372
0	6.372
0	6.372
0	6.372
-0.02	6.372
0	6.372
0	6.372
0	6.372
0	6.372
0	6.372
0	6.372
0	6.372
0	6.372
0	6.372
0	6.372
0	6.372
0	6.372
0	6.372
0	6.372
0	6.372
0	6.372
0	6.372
0	6.372

## Sheet: bending-interambu005
force	displacement
0	0
0.01	0.016
0.02	0.032
0.03	0.049
0.04	0.064
0.05	0.081
0.06	0.097
0.07	0.114
0.08	0.131
0.09	0.147
0.09	0.163
0.1	0.178
0.11	0.194
0.12	0.21
0.13	0.226
0.14	0.242
0.15	0.259
0.15	0.275
0.16	0.292
0.17	0.308
0.18	0.325
0.19	0.341
0.2	0.356
0.21	0.373
0.21	0.388
0.22	0.404
0.23	0.42
0.24	0.436
0.25	0.452
0.25	0.469
0.26	0.485
0.27	0.502
0.27	0.518
0.28	0.534
0.29	0.551
0.3	0.566
0.3	0.582
0.31	0.598
0.31	0.614
0.32	0.63
0.33	0.646
0.33	0.663
0.34	0.679
0.34	0.695
0.35	0.712
0.35	0.728
0.36	0.744
0.36	0.761
0.37	0.776
0.37	0.792
0.38	0.808
0.38	0.824
0.38	0.84
0.39	0.856
0.39	0.872
0.4	0.888
0.4	0.905
0.4	0.922
0.41	0.938
0.41	0.954
0.42	0.969
0.42	0.985
0.42	1.001
0.43	1.016
0.43	1.032
0.44	1.049
0.44	1.065
0.45	1.082
0.44	1.098
0.45	1.115
0.46	1.131
0.46	1.147
0.46	1.163
0.47	1.178
0.47	1.194
0.47	1.21
0.48	1.226
0.48	1.242
0.49	1.258
0.49	1.274
0.49	1.291
0.49	1.307
0.5	1.324
0.5	1.34
0.5	1.356
0.5	1.371
0.51	1.387
0.51	1.403
0.52	1.419
0.52	1.435
0.52	1.451
0.53	1.468
0.53	1.484
0.53	1.5
0.54	1.517
0.54	1.533
0.54	1.549
0.54	1.565
0.55	1.581
0.55	1.597
0.55	1.612
0.55	1.628
0.56	1.645
0.56	1.661
0.56	1.677
0.56	1.694
0.56	1.71
0.57	1.727
0.57	1.743
0.57	1.759
0.57	1.774
0.58	1.791
0.58	1.806
0.58	1.822
0.58	1.838
0.58	1.854
0.58	1.871
0.59	1.887
0.59	1.904
0.59	1.92
0.59	1.937
0.6	1.952
0.6	1.968
0.6	1.984
0.6	2
0.6	2.015
0.61	2.031
0.61	2.048
0.61	2.064
0.61	2.081
0.61	2.097
0.61	2.114
0.61	2.13
0.62	2.147
0.62	2.162
0.62	2.178
0.62	2.193
0.62	2.209
0.62	2.225
0.63	2.241
0.63	2.258
0.63	2.274
0.64	2.291
0.64	2.307
0.64	2.324
0.65	2.34
0.65	2.356
0.65	2.371
0.65	2.387
0.65	2.403
0.66	2.419
0.66	2.435
0.66	2.451
0.67	2.468
0.66	2.484
0.67	2.501
0.67	2.517
0.68	2.533
0.67	2.55
0.68	2.566
0.68	2.582
0.69	2.597
0.69	2.613
0.69	2.629
0.69	2.645
0.7	2.661
0.7	2.678
0.7	2.694
0.71	2.711
0.71	2.728
0.71	2.744
0.71	2.76
0.71	2.775
0.72	2.791
0.72	2.807
0.72	2.823
0.72	2.839
0.73	2.856
0.73	2.872
0.73	2.888
0.74	2.905
0.74	2.921
0.74	2.938
0.75	2.953
0.75	2.969
0.75	2.984
0.75	3.001
0.76	3.016
0.76	3.032
0.76	3.049
0.76	3.066
0.77	3.082
0.77	3.098
0.77	3.115
0.77	3.131
0.78	3.148
0.78	3.163
0.78	3.179
0.79	3.195
0.79	3.211
0.79	3.227
0.8	3.243
0.8	3.26
0.81	3.276
0.81	3.293
0.81	3.309
0.81	3.325
0.81	3.342
0.82	3.358
0.82	3.373
0.82	3.389
0.82	3.405
0.83	3.421
0.83	3.437
0.83	3.453
0.83	3.47
0.83	3.486
0.83	3.503
0.83	3.519
0.83	3.535
0.84	3.551
0.84	3.567
0.85	3.583
0.85	3.599
0.85	3.614
0.85	3.63
0.86	3.647
0.86	3.663
0.87	3.68
0.86	3.696
0.87	3.713
0.88	3.729
0.88	3.745
0.88	3.761
0.89	3.777
0.9	3.792
0.9	3.808
0.9	3.824
0.91	3.84
0.91	3.857
0.91	3.873
0.91	3.89
0.91	3.906
0.91	3.922
0.92	3.939
0.92	3.954
0.92	3.97
0.92	3.986
0.92	4.002
0.93	4.017
0.93	4.033
0.93	4.049
0.94	4.066
0.95	4.082
0.95	4.099
0.95	4.115
0.96	4.131
0.97	4.148
0.97	4.163
0.97	4.179
0.97	4.194
0.97	4.21
0.97	4.226
0.98	4.242
0.98	4.258
0.99	4.274
0.99	4.291
1	4.307
1	4.324
1	4.34
1.01	4.356
1.01	4.372
1.02	4.387
1.02	4.403
1.02	4.419
1.03	4.435
1.03	4.451
1.03	4.467
1.04	4.484
1.04	4.5
1.04	4.517
1.04	4.533
1.04	4.549
1.04	4.565
1.05	4.58
1.05	4.596
1.05	4.612
1.05	4.628
1.05	4.645
1.05	4.661
1.06	4.678
1.06	4.694
1.06	4.711
1.07	4.727
1.07	4.743
1.08	4.759
1.07	4.774
1.08	4.79
1.08	4.806
1.09	4.822
1.08	4.838
1.08	4.854
1.08	4.87
1.08	4.887
-0.02	4.904
0	4.921
0	4.938
0	4.953
0	4.97
0	4.985
0	5.001
0	5.017
0	5.033
0	5.049
0	5.066
0	5.082
0	5.099
0	5.115
0	5.132
0	5.148
0	5.164
0	5.18
0	5.195
0	5.211
0	5.227
0	5.243
0	5.26
0	5.276
0	5.293
0	5.309
0	5.326
0	5.342
0	5.358
0	5.373
0	5.389
0	5.405
0	5.421
0	5.437
0	5.453
0	5.47
0	5.486
0	5.503
0	5.519
0	5.535
0	5.551
0	5.567
-0.01	5.583
0.01	5.598
0	5.598
0	5.598
0	5.598
0	5.598
0	5.598
0	5.598
0.01	5.598
0	5.598
0	5.598
0	5.598
0	5.598
0	5.598
0	5.598
0	5.598
0	5.598
0	5.598
0	5.598
0	5.598
0	5.598
0	5.598
0	5.598
0	5.598
0	5.598
0	5.598
0	5.598
0	5.598
0	5.598
0	5.598
0	5.598

## Sheet: bending-interambu006
force	displacement
0	0
0.01	0.017
0.02	0.032
0.03	0.049
0.03	0.065
0.04	0.082
0.05	0.098
0.05	0.115
0.06	0.131
0.07	0.146
0.07	0.162
0.08	0.178
0.08	0.193
0.09	0.209
0.09	0.226
0.1	0.242
0.1	0.259
0.11	0.275
0.11	0.292
0.12	0.308
0.12	0.324
0.13	0.34
0.13	0.356
0.14	0.371
0.14	0.387
0.15	0.403
0.15	0.42
0.15	0.436
0.16	0.452
0.17	0.469
0.17	0.486
0.17	0.502
0.18	0.518
0.18	0.534
0.19	0.55
0.19	0.565
0.2	0.581
0.2	0.597
0.2	0.613
0.21	0.63
0.21	0.646
0.22	0.662
0.22	0.679
0.23	0.695
0.23	0.712
0.23	0.728
0.24	0.743
0.24	0.759
0.24	0.775
0.25	0.791
0.25	0.807
0.25	0.823
0.26	0.84
0.26	0.856
0.26	0.872
0.27	0.889
0.28	0.906
0.28	0.922
0.28	0.938
0.28	0.953
0.28	0.969
0.29	0.985
0.29	1.001
0.29	1.017
0.3	1.033
0.3	1.05
0.3	1.067
0.3	1.083
0.31	1.1
0.31	1.116
0.31	1.132
0.32	1.148
0.32	1.163
0.32	1.179
0.32	1.195
0.32	1.211
0.32	1.227
0.33	1.244
0.33	1.26
0.33	1.277
0.33	1.293
0.33	1.309
0.33	1.325
0.34	1.341
0.34	1.357
0.34	1.372
0.34	1.388
0.34	1.405
0.34	1.421
0.34	1.438
0.35	1.454
0.35	1.47
0.35	1.487
0.35	1.503
0.35	1.52
0.35	1.535
0.35	1.551
0.36	1.567
0.36	1.583
0.36	1.598
0.36	1.615
0.36	1.631
0.36	1.647
0.37	1.663
0.37	1.68
0.37	1.696
0.37	1.713
0.37	1.729
0.37	1.744
0.37	1.76
0.37	1.776
0.37	1.791
0.37	1.807
0.37	1.824
0.38	1.84
0.38	1.857
0.38	1.873
0.38	1.889
0.38	1.906
0.38	1.922
0.38	1.938
0.38	1.953
0.39	1.969
0.39	1.985
0.39	2.001
0.39	2.017
0.39	2.033
0.39	2.05
0.39	2.066
0.4	2.083
0.4	2.099
0.4	2.115
0.4	2.131
0.4	2.147
0.4	2.162
0.4	2.178
0.41	2.194
0.41	2.211
0.41	2.227
0.41	2.243
0.41	2.26
0.41	2.276
0.41	2.292
0.41	2.308
0.42	2.325
0.42	2.34
0.42	2.357
0.42	2.372
0.42	2.388
0.42	2.404
0.42	2.42
0.42	2.437
0.42	2.453
0.42	2.469
0.43	2.486
0.43	2.502
0.43	2.518
0.43	2.534
0.43	2.55
0.43	2.566
0.43	2.581
0.44	2.597
0.44	2.614
0.44	2.63
0.44	2.646
0.44	2.663
0.44	2.679
0.44	2.696
0.44	2.712
0.45	2.728
0.45	2.744
0.45	2.759
0.45	2.775
0.45	2.791
0.45	2.807
0.45	2.823
0.45	2.84
0.45	2.857
0.45	2.873
0.46	2.889
0.46	2.906
0.46	2.922
0.46	2.938
0.46	2.953
0.46	2.969
0.46	2.985
0.46	3.001
0.47	3.017
0.47	3.033
0.47	3.05
0.47	3.066
0.47	3.083
0.47	3.099
0.47	3.115
0.48	3.131
0.48	3.147
0.48	3.162
0.48	3.178
0.48	3.194
0.48	3.21
0.48	3.227
0.48	3.243
0.48	3.259
0.49	3.276
0.49	3.292
0.49	3.309
0.49	3.325
0.49	3.341
0.49	3.357
0.49	3.372
0.49	3.388
0.49	3.404
0.5	3.42
0.5	3.437
0.5	3.453
0.5	3.47
0.5	3.487
0.5	3.503
0.5	3.519
0.5	3.535
0.5	3.551
0.5	3.567
0.5	3.582
0.51	3.598
0.51	3.614
0.51	3.63
0.51	3.647
0.51	3.663
0.51	3.68
0.51	3.697
0.51	3.713
0.51	3.729
0.52	3.744
0.52	3.76
0.52	3.776
0.52	3.792
0.52	3.808
0.52	3.825
0.52	3.841
0.52	3.858
0.52	3.874
0.52	3.89
0.52	3.907
0.52	3.922
0.53	3.939
0.53	3.954
0.53	3.97
0.53	3.986
0.53	4.002
0.53	4.018
0.53	4.035
0.53	4.051
0.53	4.068
0.53	4.084
0.53	4.101
0.53	4.117
0.53	4.133
0.53	4.149
0.54	4.164
0.54	4.18
0.54	4.196
0.54	4.212
0.54	4.228
0.54	4.245
0.54	4.261
0.54	4.278
0.54	4.295
0.54	4.311
0.54	4.327
0.54	4.342
0.54	4.359
0.55	4.374
0.55	4.39
0.55	4.406
0.55	4.422
0.55	4.439
0.55	4.455
0.55	4.472
0.54	4.488
0.54	4.505
0.54	4.521
0.54	4.537
0.54	4.552
0.54	4.568
0.55	4.584
0.55	4.6
0.56	4.616
0.56	4.632
0.56	4.649
0.56	4.665
0.56	4.681
0.56	4.698
0.56	4.714
0.56	4.73
0.56	4.746
0.56	4.761
0.56	4.777
0.56	4.793
0.56	4.809
0.57	4.825
0.57	4.841
0.57	4.858
0.57	4.874
0.57	4.891
0.57	4.907
0.57	4.923
0.57	4.939
0.57	4.955
0.57	4.97
0.57	4.986
0.57	5.002
0.57	5.018
0.57	5.034
0.57	5.05
0.57	5.067
0.57	5.084
0.57	5.1
0.57	5.117
0.57	5.132
0.57	5.148
0.57	5.164
0.57	5.179
0.57	5.195
0.57	5.211
0.57	5.228
0.57	5.244
0.57	5.26
0.57	5.277
0.57	5.294
0.57	5.31
0.57	5.326
0.57	5.342
0.57	5.358
0.58	5.373
0.58	5.389
0.58	5.405
0.57	5.422
0.57	5.438
0.58	5.454
0.58	5.471
0.57	5.487
0.57	5.504
0.57	5.52
0.58	5.536
0.58	5.551
0.58	5.567
0.57	5.582
0.57	5.598
0.58	5.615
0.58	5.631
0.58	5.648
0.58	5.664
0.58	5.68
0.58	5.697
0.58	5.713
0.58	5.729
0.58	5.745
0.58	5.76
0.58	5.776
0.59	5.792
0.58	5.808
0.58	5.825
0.58	5.841
0.59	5.858
0.59	5.874
0.59	5.89
0.59	5.907
0.59	5.923
0.59	5.939
0.59	5.955
0.59	5.97
0.59	5.986
0.59	6.002
0.58	6.018
0.58	6.035
0.59	6.051
0.59	6.067
0.59	6.084
0.59	6.1
0.6	6.117
0.6	6.132
0.6	6.148
0.6	6.164
0.6	6.179
0.6	6.195
0.61	6.211
0.61	6.227
0.61	6.244
0.61	6.261
0.61	6.278
0.61	6.294
0.61	6.31
0.61	6.326
0.6	6.342
0.6	6.358
0.61	6.373
0.61	6.389
0.6	6.405
0.6	6.422
0.6	6.438
0.61	6.455
0.62	6.471
0.61	6.487
0.61	6.504
0.61	6.52
0.62	6.536
0.62	6.552
0.62	6.568
0.61	6.583
0.61	6.599
0.62	6.615
0.61	6.632
0.62	6.648
0.62	6.665
0.61	6.681
0.61	6.697
0.62	6.714
0.62	6.729
0.62	6.745
0.63	6.761
0.63	6.777
0.62	6.793
0.62	6.808
0.62	6.825
0.62	6.841
0.62	6.858
0.62	6.874
0.63	6.891
0.63	6.907
0.63	6.924
0.63	6.939
0.63	6.955
0.63	6.971
0.63	6.987
0.64	7.003
0.64	7.019
0.65	7.035
0.65	7.052
0.65	7.069
0.64	7.085
0.64	7.101
0.64	7.118
0.65	7.134
0.66	7.149
0.66	7.165
0.65	7.18
0.64	7.197
0.64	7.213
0.64	7.229
0.64	7.246
0.65	7.262
0.64	7.279
0.64	7.295
0.64	7.311
0.64	7.327
0.64	7.343
0.64	7.359
0.64	7.375
0.64	7.39
0.63	7.407
0.63	7.423
0.64	7.439
0.65	7.456
0.65	7.472
0.65	7.489
0.66	7.505
0.66	7.521
0.65	7.537
0.65	7.553
0.66	7.569
0.66	7.584
0.66	7.6
0.67	7.616
0.66	7.633
0.66	7.649
0.67	7.665
0.67	7.682
0.68	7.698
0.68	7.715
0.68	7.73
0.68	7.746
0.67	7.762
0.67	7.777
0.67	7.793
0.67	7.809
0.67	7.825
0.67	7.842
0.67	7.858
0.67	7.875
0.02	7.892
0	7.908
0.04	7.925
0.08	7.94
0.11	7.956
0.12	7.971
0.14	7.987
0.16	8.003
0.18	8.019
0.19	8.035
0.19	8.052
0.2	8.068
0.22	8.084
0.22	8.101
0.22	8.117
0.23	8.133
0.24	8.149
0.24	8.165
0.25	8.18
0.26	8.196
0.26	8.213
0.27	8.228
0.28	8.245
0.28	8.261
0.29	8.278
0.29	8.294
0.29	8.311
0.29	8.327
0.3	8.343
0.31	8.358
0.31	8.374
0.31	8.39
0.31	8.406
0.32	8.422
0.32	8.438
0.33	8.455
0.34	8.471
0.34	8.488
0.34	8.505
0.33	8.521
0.35	8.537
0.35	8.552
0.35	8.568
0.36	8.583
0.37	8.599
0.36	8.616
0.37	8.632
0.38	8.648
0.38	8.665
0.38	8.681
0.37	8.698
0.37	8.701
0.37	8.701
0.37	8.701
0.36	8.701
0.36	8.701
0.36	8.701
0.36	8.701
0.36	8.701
0.36	8.701
0.36	8.701
0.36	8.701
0.36	8.701
0.36	8.701
0.35	8.701
0.35	8.701
0.35	8.701
0.35	8.701
0.35	8.701
0.35	8.701
0.35	8.701
0.35	8.701
0.35	8.701
0.35	8.701
0.35	8.701
0.35	8.701
0.35	8.701
0.35	8.701
0.35	8.701
0.35	8.701
0.35	8.701
0.35	8.701
0.35	8.701
0.35	8.701
0.35	8.701
0.35	8.701
0.35	8.701
0.35	8.701
0.35	8.701
0.35	8.701

## Sheet: bending-interambu007
force	displacement
0	0
0.02	0.016
0.02	0.032
0.03	0.048
0.04	0.063
0.05	0.08
0.06	0.095
0.07	0.111
0.07	0.128
0.08	0.144
0.09	0.161
0.09	0.177
0.1	0.193
0.1	0.21
0.11	0.226
0.12	0.241
0.13	0.257
0.13	0.273
0.14	0.289
0.14	0.305
0.15	0.321
0.16	0.338
0.16	0.354
0.17	0.371
0.18	0.387
0.18	0.403
0.19	0.42
0.19	0.436
0.2	0.451
0.21	0.467
0.21	0.483
0.22	0.499
0.22	0.515
0.23	0.531
0.24	0.548
0.24	0.564
0.24	0.581
0.25	0.598
0.26	0.614
0.26	0.63
0.27	0.645
0.27	0.661
0.28	0.676
0.28	0.692
0.29	0.709
0.29	0.725
0.3	0.741
0.31	0.758
0.31	0.774
0.31	0.791
0.32	0.807
0.32	0.823
0.33	0.839
0.33	0.855
0.34	0.871
0.34	0.886
0.35	0.902
0.35	0.919
0.36	0.936
0.36	0.952
0.37	0.968
0.37	0.985
0.38	1.001
0.38	1.017
0.38	1.033
0.39	1.049
0.4	1.065
0.4	1.081
0.41	1.096
0.41	1.112
0.41	1.129
0.42	1.145
0.42	1.161
0.43	1.178
0.43	1.194
0.43	1.211
0.44	1.227
0.45	1.242
0.45	1.258
0.45	1.273
0.46	1.289
0.46	1.305
0.46	1.321
0.47	1.338
0.47	1.354
0.47	1.371
0.48	1.387
0.48	1.404
0.48	1.42
0.49	1.436
0.49	1.451
0.5	1.467
0.5	1.482
0.51	1.498
0.51	1.515
0.51	1.531
0.52	1.548
0.53	1.564
0.53	1.581
0.53	1.597
0.54	1.613
0.54	1.629
0.54	1.644
0.55	1.66
0.55	1.676
0.55	1.692
0.56	1.708
0.56	1.725
0.57	1.74
0.57	1.757
0.57	1.773
0.57	1.79
0.58	1.806
0.58	1.822
0.59	1.838
0.59	1.854
0.59	1.87
0.6	1.885
0.6	1.901
0.6	1.918
0.61	1.934
0.61	1.95
0.04	1.967
0	1.984
0	2
0	2.017
0	2.032
0	2.048
0	2.064
0	2.079
0	2.095
0	2.111
0	2.128
0	2.144
0	2.16
0	2.177
0	2.194
0	2.21
0	2.226
0	2.241
0	2.257
0	2.273
0	2.289
0	2.304
0	2.321
0	2.338
0	2.354
0	2.37
0	2.387
0	2.404
0	2.42
0.02	2.436
0.03	2.45
0.04	2.467
0.05	2.482
0.06	2.499
0.06	2.515
0.08	2.531
0.08	2.548
0.09	2.564
0.1	2.58
0.1	2.597
0.11	2.613
0.09	2.629
0.11	2.645
0.12	2.66
0.13	2.676
0.13	2.692
0.15	2.708
0.15	2.725
0.17	2.74
0.17	2.757
0.18	2.774
0.19	2.79
0.19	2.807
0.2	2.823
0.21	2.839
0.22	2.855
0.22	2.87
0.24	2.886
0.24	2.902
0.25	2.918
0.25	2.935
0.26	2.951
0.26	2.968
0.27	2.984
0.29	3.001
0.29	3.017
0.3	3.033
0.31	3.049
0.31	3.064
0.32	3.08
0.32	3.096
0.33	3.112
0.34	3.129
0.34	3.145
0.35	3.161
0.35	3.178
0.37	3.194
0.37	3.211
0.38	3.227
0.38	3.242
0.39	3.258
0.4	3.273
0.41	3.29
0.41	3.306
0.41	3.322
0.41	3.339
0.42	3.355
0.43	3.371
0.43	3.388
0.43	3.405
0.44	3.42
0.45	3.437
0.46	3.452
0.46	3.468
0.47	3.484
0.47	3.5
0.48	3.516
0.48	3.52
0.47	3.52
0.47	3.52
0.47	3.52
0.46	3.52
0.46	3.52
0.46	3.52
0.46	3.52
0.46	3.52
0.45	3.52
0.45	3.52
0.45	3.52
0.45	3.52
0.45	3.52
0.44	3.52
0.44	3.52
0.44	3.52
0.44	3.52
0.44	3.52
0.44	3.52
0.44	3.52
0.43	3.52
0.43	3.52
0.43	3.52
0.43	3.52
0.43	3.52
0.43	3.52
0.43	3.52
0.43	3.52
0.42	3.52
0.42	3.52
0.42	3.52
0.42	3.52
0.4	3.491
0.15	3.16
0	2.67
0	2.171
0	1.671
0	1.171
0	0.67
-0.01	0.171
0	-0.329
0	-0.828
0.01	-1.287
0	-1.287
0	-1.287
0	-1.287
0	-1.287
0	-1.287
0	-1.287
0	-1.287
0	-1.287
0	-1.287
0	-1.287
0	-1.287
0	-1.287
0	-1.287
0	-1.287
0	-1.287
0	-1.287

## Sheet: bending-interambu008
force	displacement
0	0
0.01	0.017
0.02	0.032
0.04	0.048
0.04	0.063
0.05	0.079
0.06	0.095
0.08	0.111
0.09	0.128
0.1	0.144
0.1	0.161
0.11	0.178
0.13	0.194
0.14	0.21
0.15	0.226
0.16	0.242
0.17	0.258
0.18	0.273
0.19	0.289
0.2	0.305
0.21	0.322
0.22	0.338
0.23	0.355
0.24	0.371
0.25	0.388
0.26	0.404
0.27	0.42
0.28	0.436
0.29	0.452
0.3	0.468
0.31	0.483
0.32	0.499
0.33	0.516
0.33	0.532
0.34	0.549
0.36	0.565
0.37	0.581
0.38	0.598
0.39	0.614
0.4	0.629
0.4	0.645
0.41	0.661
0.43	0.677
0.43	0.693
0.44	0.709
0.45	0.725
0.46	0.742
0.47	0.759
0.48	0.775
0.49	0.791
0.5	0.808
0.51	0.824
0.52	0.84
0.53	0.855
0.54	0.871
0.54	0.887
0.55	0.903
0.57	0.919
0.57	0.936
0.58	0.952
0.59	0.969
0.6	0.985
0.61	1.002
0.62	1.018
0.63	1.034
0.64	1.05
0.65	1.065
0.66	1.081
0.67	1.097
0.68	1.113
0.68	1.129
0.69	1.146
0.7	1.162
0.71	1.179
0.72	1.195
0.73	1.211
0.74	1.227
0.75	1.243
0.76	1.259
0.77	1.275
0.78	1.291
0.78	1.307
0.79	1.323
0.8	1.34
0.81	1.356
0.82	1.372
0.82	1.389
0.83	1.405
0.84	1.421
0.85	1.437
0.86	1.453
0.87	1.469
0.87	1.485
0.88	1.5
0.89	1.517
0.9	1.533
0.9	1.549
0.91	1.566
0.92	1.582
0.93	1.599
0.94	1.615
0.94	1.63
0.95	1.646
0.96	1.662
0.97	1.678
0	1.694
0	1.71
0	1.726
0	1.743
0	1.76
0	1.776
0	1.792
0	1.809
0	1.825
0	1.84
0	1.856
0	1.871
0	1.887
0	1.903
0	1.919
0	1.936
0	1.953
0	1.969
0	1.985
0	2.002
0	2.018
0	2.034
0	2.049
0	2.065
0	2.081
0	2.097
0	2.113
0	2.129
0	2.146
0	2.162
0	2.179
0	2.195
0	2.211
0	2.227
0	2.243
0	2.259
0	2.275
0	2.29
0	2.306
0	2.323
0	2.339
0	2.356
0	2.372
0	2.389
0	2.405
0	2.421
0	2.437
0	2.453
0	2.463
0	2.463
0	2.463
0	2.463
0	2.463
0	2.463
-0.01	2.463
0	2.463
0	2.463
0	2.463
0	2.463
0	2.463
0	2.463
0	2.463
0	2.463
0	2.463
0	2.463
0	2.463
0	2.463
0	2.463
0	2.463
0	2.463

## Sheet: bending-interambu009
force	displacement
0	0
0.01	0.016
0.02	0.032
0.03	0.048
0.03	0.065
0.05	0.081
0.05	0.098
0.06	0.115
0.07	0.131
0.08	0.147
0.09	0.162
0.1	0.178
0.1	0.194
0.11	0.21
0.12	0.226
0.13	0.243
0.13	0.259
0.14	0.276
0.15	0.292
0.15	0.309
0.16	0.325
0.17	0.341
0.18	0.357
0.19	0.372
0.2	0.388
0.2	0.404
0.21	0.42
0.21	0.436
0.22	0.453
0.23	0.469
0.24	0.486
0.24	0.502
0.25	0.518
0.25	0.535
0.26	0.55
0.26	0.566
0.28	0.582
0.28	0.597
0.29	0.614
0.29	0.63
0.3	0.647
0.31	0.663
0.31	0.68
0.32	0.696
0.33	0.712
0.33	0.728
0.34	0.744
0.34	0.76
0.35	0.776
0.35	0.792
0.36	0.808
0.37	0.824
0.37	0.84
0.37	0.857
0.38	0.873
0.39	0.889
0.39	0.906
0.4	0.922
0.4	0.938
0.4	0.953
0.41	0.969
0.42	0.985
0.43	1
0.43	1.016
0.43	1.033
0.44	1.049
0.44	1.066
0.45	1.082
0.45	1.099
0.46	1.115
0.46	1.131
0.46	1.147
0.47	1.162
0.47	1.178
0.48	1.194
0.48	1.21
0.48	1.226
0.49	1.243
0.5	1.259
0.5	1.275
0.5	1.292
0.51	1.308
0.51	1.324
0.51	1.34
0.51	1.356
0.52	1.371
0.52	1.387
0.52	1.403
0.53	1.419
0.53	1.436
0.53	1.452
0.54	1.468
0.54	1.485
0.54	1.502
0.54	1.518
0.55	1.534
0.55	1.549
0.55	1.566
0.55	1.581
0.56	1.597
0.56	1.613
0.57	1.629
0.56	1.646
0.57	1.662
0.57	1.678
0.57	1.695
0.57	1.711
0.57	1.727
0.57	1.743
0.57	1.759
0.58	1.775
0.58	1.79
0.58	1.806
0.58	1.823
0.58	1.838
0.58	1.855
0.58	1.871
0.58	1.888
0.58	1.905
0.59	1.921
0.59	1.937
0.59	1.952
0.59	1.968
0.59	1.984
0.59	2
0.59	2.016
0.59	2.032
0.59	2.048
0.59	2.065
0.59	2.082
0.59	2.098
0.59	2.115
0.59	2.13
0.59	2.146
0.59	2.162
0.59	2.177
0.59	2.193
0.59	2.209
0.59	2.226
0.59	2.242
0.59	2.258
0.59	2.275
0.59	2.291
0.6	2.308
0.6	2.324
0.6	2.34
0.6	2.356
0.6	2.371
0.6	2.387
0.6	2.403
0.6	2.419
0.6	2.436
0.6	2.452
0.6	2.468
0.6	2.485
0.6	2.502
0.6	2.518
0.6	2.534
0.6	2.55
0.6	2.566
0.6	2.581
0.6	2.597
0.6	2.613
0.6	2.629
0.6	2.646
0.6	2.662
0.6	2.679
0.6	2.696
0.6	2.712
0.6	2.728
0.6	2.744
0.6	2.76
0.6	2.776
0.6	2.791
0.6	2.807
0.6	2.824
0.6	2.84
0.6	2.857
0.6	2.873
0.6	2.889
0.6	2.906
0.6	2.922
0.6	2.938
0.6	2.953
0.6	2.969
0.6	2.985
0.6	3.001
0.6	3.017
0.6	3.034
0.6	3.05
0.6	3.067
0.6	3.083
0.6	3.099
0.6	3.116
0.6	3.132
0.6	3.148
0.6	3.163
0.6	3.179
0.6	3.195
0.6	3.211
0.6	3.227
0.6	3.244
0.6	3.26
0.6	3.277
0.6	3.293
0.6	3.31
0.6	3.326
0.6	3.342
0.59	3.358
0.59	3.373
0.59	3.389
0.58	3.405
0.58	3.421
0.58	3.438
0.58	3.454
0.57	3.47
0.57	3.487
0.57	3.504
0.57	3.52
0.56	3.536
0.56	3.552
0.56	3.568
0.56	3.583
0.56	3.599
0.56	3.615
0.56	3.632
0.56	3.648
0.56	3.665
0.55	3.681
0.55	3.698
0.55	3.714
0.55	3.73
0.55	3.746
0.54	3.761
0.54	3.777
0.54	3.793
0.54	3.809
0.53	3.825
0.53	3.842
0.53	3.858
0.52	3.874
0.52	3.891
0.52	3.907
0.52	3.923
0.52	3.939
0.52	3.955
0.52	3.97
0.51	3.986
0.51	4.002
0.51	4.018
0.51	4.034
0.51	4.051
0.51	4.067
0.51	4.083
0.5	4.1
0.49	4.116
0.49	4.133
0.49	4.148
0.48	4.164
0.48	4.179
0.48	4.195
0.48	4.211
0.47	4.227
0.47	4.244
0.47	4.26
0.47	4.276
0.47	4.293
0.47	4.309
0.47	4.326
0.47	4.342
0.47	4.357
0.47	4.373
0.47	4.388
0.47	4.404
0.47	4.421
0.47	4.437
0.47	4.453
0.47	4.47
0.47	4.487
0.47	4.503
0.48	4.519
0.48	4.535
0.48	4.551
0.48	4.566
0.48	4.582
0.48	4.598
0.48	4.614
0.48	4.631
0.48	4.647
0.48	4.663
0.48	4.68
0.48	4.696
0.48	4.713
0.48	4.728
0.47	4.744
0.47	4.76
0.47	4.776
0.47	4.792
0.47	4.807
0.47	4.824
0.47	4.84
0.47	4.857
0.47	4.873
0.47	4.89
0.47	4.906
0.47	4.923
0.47	4.938
0.47	4.954
0.47	4.969
0.46	4.985
0.46	5.001
0.46	5.017
0.47	5.034
0.47	5.05
0.47	5.067
0.47	5.083
0.47	5.1
0.47	5.116
0.47	5.132
0.47	5.148
0.46	5.164
0.46	5.179
0.46	5.195
0.46	5.211
0.46	5.227
0.47	5.244
0.47	5.26
0.47	5.277
0.46	5.293
0.46	5.31
0.47	5.326
0.47	5.342
0.47	5.357
0.47	5.373
0.48	5.388
0.48	5.404
0.47	5.421
0.47	5.437
0.46	5.454
0.46	5.47
0.47	5.487
0.47	5.503
0.47	5.519
0.47	5.535
0.47	5.551
0.47	5.567
0.47	5.583
0.46	5.598
0.47	5.615
0.47	5.631
0.47	5.647
0.47	5.664
0.47	5.681
0.47	5.697
0.47	5.714
0.47	5.729
0.48	5.746
0.48	5.761
0.48	5.777
0.48	5.793
0.47	5.809
0.47	5.825
0.48	5.842
0.48	5.858
0.48	5.874
0.48	5.891
0.48	5.907
0.48	5.924
0.48	5.939
0.48	5.955
0.48	5.971
0.48	5.987
0.48	6.002
0.48	6.018
0.48	6.035
0.47	6.051
0.47	6.068
0.47	6.084
0.48	6.101
0.48	6.117
0.49	6.134
0.49	6.149
0.49	6.165
0.49	6.18
0.48	6.196
0.48	6.212
0.49	6.228
0.49	6.245
0.49	6.262
0.49	6.278
0.5	6.295
0.48	6.311
0.48	6.327
0.48	6.344
0.49	6.359
0.49	6.375
0.49	6.39
0.49	6.407
0.49	6.423
0.49	6.439
0.49	6.456
0.5	6.472
0.5	6.488
0.51	6.505
0.52	6.521
0.51	6.537
0.52	6.553
0.52	6.568
0.53	6.584
0.53	6.6
0.53	6.616
0.53	6.633
0.53	6.649
0.53	6.666
0.52	6.682
0.52	6.699
0.52	6.715
0.52	6.731
0.53	6.747
0.53	6.763
0.53	6.778
0.53	6.794
0.53	6.81
0.53	6.826
0.54	6.843
0.54	6.859
0.54	6.875
0.55	6.892
0.55	6.908
0.54	6.925
0.55	6.94
0.55	6.956
0.55	6.971
0.55	6.987
0.55	7.003
0.55	7.019
0.55	7.035
0.55	7.052
0.55	7.068
0.56	7.085
0.55	7.101
0.55	7.118
0.55	7.134
0.55	7.149
0.55	7.165
0.55	7.18
0.56	7.196
0.55	7.212
0.55	7.228
0.56	7.245
0.56	7.261
0.55	7.277
0.56	7.294
0.56	7.31
0.56	7.326
0.56	7.343
0.56	7.358
0.56	7.374
0.57	7.39
0.57	7.406
0.58	7.422
0.58	7.438
0.55	7.455
0.56	7.471
0.56	7.487
0.56	7.504
0.57	7.52
0.58	7.536
0.59	7.552
0.58	7.568
0.58	7.584
0.58	7.599
0.59	7.615
0.6	7.632
0.6	7.648
0.59	7.665
0.59	7.681
0.6	7.698
0.61	7.714
0.59	7.73
0.59	7.746
0.6	7.762
0.6	7.777
0.61	7.793
0.61	7.809
0.62	7.825
0.62	7.842
0.62	7.858
0.62	7.874
0.63	7.891
0.63	7.907
0.63	7.923
0.63	7.939
-0.01	7.955
0	7.971
0	7.986
0	8.002
0	8.019
0	8.035
0	8.052
0	8.068
0	8.084
0	8.101
0	8.117
0	8.133
0	8.149
0	8.165
0	8.18
0	8.196
0	8.212
0	8.229
0	8.245
0	8.261
0	8.277
0	8.294
0	8.311
0	8.327
0	8.343
0	8.359
0	8.374
0	8.39
0	8.406
0	8.422
0	8.438
0	8.455
0	8.471
0	8.488
0	8.505
0	8.521
0	8.537
0	8.553
0	8.568
0	8.584
0	8.6
0	8.616
0	8.633
0	8.649
0	8.666
0	8.682
0	8.699
0	8.715
0	8.731
0	8.747
0	8.763
0.01	8.778
0	8.794
0	8.81
0	8.826
0	8.843
0	8.859
0	8.876
0	8.892
0	8.909
0	8.925
0	8.941
0	8.956
0	8.972
0	8.988
0	9.004
0	9.017
0	9.017
0	9.017
0	9.017
0	9.017
0	9.017
0	9.017
0	9.017
0	9.017
0	9.017
0	9.017
0	9.017
0	9.017
0	9.017
0	9.017
0	9.017
0	9.017
0	9.017
0	9.017
0	9.017
0	9.017
0	9.017

## Sheet: bending-interambu010
force	displacement
0	0
0.01	0.016
0.02	0.032
0.03	0.048
0.04	0.065
0.04	0.081
0.05	0.098
0.06	0.114
0.07	0.131
0.08	0.147
0.08	0.163
0.09	0.179
0.1	0.194
0.11	0.21
0.11	0.226
0.12	0.242
0.13	0.259
0.14	0.275
0.15	0.292
0.16	0.308
0.16	0.325
0.17	0.341
0.18	0.357
0.19	0.373
0.19	0.389
0.2	0.404
0.21	0.42
0.21	0.436
0.22	0.452
0.22	0.469
0.24	0.485
0.24	0.502
0.25	0.518
0.25	0.535
0.26	0.551
0.26	0.566
0.27	0.582
0.28	0.598
0.29	0.614
0.29	0.63
0.3	0.646
0.3	0.663
0.31	0.679
0.32	0.695
0.32	0.712
0.33	0.729
0.34	0.744
0.34	0.761
0.35	0.776
0.35	0.792
0.36	0.808
0.37	0.824
0.37	0.84
0.37	0.856
0.38	0.872
0.39	0.889
0.39	0.905
0.39	0.921
0.4	0.938
0.4	0.954
0.41	0.97
0.42	0.985
0.42	1.001
0.42	1.017
0.43	1.032
0.43	1.049
0.44	1.065
0.44	1.081
0.44	1.098
0.45	1.115
0.45	1.131
0.45	1.147
0.45	1.163
0.46	1.179
0.46	1.194
0.47	1.21
0.47	1.226
0.47	1.242
0.48	1.258
0.48	1.275
0.48	1.291
0.49	1.308
0.49	1.324
0.49	1.34
0.5	1.356
0.5	1.372
0.5	1.388
0.5	1.403
0.5	1.419
0.51	1.435
0.51	1.451
0.51	1.468
0.52	1.484
0.52	1.501
0.52	1.517
0.53	1.533
0.52	1.55
0.53	1.566
0.53	1.581
0.53	1.597
0.53	1.613
0.53	1.629
0.54	1.645
0.54	1.661
0.54	1.678
0.54	1.694
0.55	1.711
0.55	1.727
0.55	1.743
0.55	1.759
0.55	1.775
0.56	1.791
0.56	1.806
0.57	1.822
0.56	1.838
0.56	1.855
0.57	1.871
0.57	1.888
0.57	1.904
0.57	1.92
0.57	1.937
0.58	1.953
0.58	1.968
0.58	1.984
0.58	2
0.58	2.016
0.59	2.031
0.59	2.048
0.59	2.064
0.59	2.081
0.59	2.097
0.59	2.114
0.6	2.13
0.6	2.147
0.6	2.162
0.6	2.178
0.6	2.193
0.6	2.209
0.6	2.225
0.61	2.241
0.61	2.258
0.61	2.274
0.61	2.291
0.61	2.307
0.61	2.324
0.61	2.34
0.62	2.356
0.62	2.371
0.62	2.388
0.62	2.403
0.62	2.419
0.62	2.435
0.62	2.451
0.62	2.468
0.62	2.484
0.62	2.501
0.62	2.517
0.63	2.534
0.63	2.55
0.63	2.566
0.63	2.581
0.63	2.597
0.63	2.613
0.63	2.629
0.63	2.646
0.63	2.662
0.63	2.678
0.63	2.695
0.64	2.712
0.64	2.728
0.64	2.744
0.64	2.76
0.64	2.776
0.64	2.792
0.64	2.808
0.64	2.823
0.64	2.839
0.65	2.856
0.65	2.872
0.65	2.889
0.65	2.905
0.65	2.922
0.65	2.938
0.65	2.954
0.65	2.969
0.65	2.985
0.65	3.001
0.66	3.017
0.66	3.033
0.66	3.049
0.66	3.066
0.66	3.082
0.66	3.099
0.66	3.115
0.66	3.132
0.66	3.148
0.67	3.163
0.67	3.179
0.67	3.195
0.67	3.211
0.67	3.227
0.67	3.243
0.67	3.26
0.67	3.276
0.67	3.292
0.67	3.309
0.68	3.325
0.68	3.342
0.68	3.358
0.68	3.373
0.68	3.39
0.68	3.405
0.68	3.421
0.68	3.437
0.69	3.453
0.69	3.469
0.69	3.486
0.69	3.502
0.69	3.519
0.69	3.536
0.69	3.552
0.69	3.568
0.69	3.583
0.69	3.599
0.69	3.614
0.69	3.631
0.69	3.647
0.69	3.663
0.69	3.68
0.7	3.696
0.7	3.713
0.7	3.73
0.7	3.746
0.7	3.761
0.7	3.777
0.7	3.792
0.7	3.809
0.7	3.824
0.7	3.84
0.7	3.857
0.7	3.873
0.7	3.89
0.7	3.906
0.71	3.922
0.71	3.939
0.71	3.954
0.71	3.97
0.71	3.986
0.71	4.002
0.71	4.017
0.72	4.033
0.72	4.049
0.72	4.066
0.72	4.082
0.72	4.099
0.72	4.115
0.72	4.132
0.72	4.148
0.72	4.164
0.72	4.18
0.72	4.195
0.72	4.211
0.72	4.227
0.72	4.243
0.72	4.259
0.73	4.275
0.73	4.291
0.73	4.308
0.73	4.325
0.73	4.341
0.73	4.357
0.73	4.373
0.73	4.389
0.73	4.404
0.73	4.42
0.73	4.436
0.73	4.452
0.73	4.468
0.74	4.485
0.74	4.501
0.74	4.518
0.74	4.534
0.74	4.55
0.74	4.566
0.75	4.582
0.75	4.598
0.75	4.613
0.75	4.629
0.75	4.646
0.75	4.662
0.76	4.678
0.76	4.695
0.76	4.711
0.76	4.728
0.76	4.744
0.76	4.76
0.76	4.776
0.77	4.791
0.77	4.807
0.77	4.823
0.77	4.839
0.77	4.856
0.77	4.872
0.77	4.889
0.77	4.905
0.77	4.921
0.78	4.938
0.78	4.954
0.78	4.969
0.79	4.985
0.79	5.001
0.79	5.016
0.8	5.032
0.79	5.049
0.79	5.065
0.79	5.082
0.79	5.098
0.79	5.114
0.8	5.131
0.8	5.147
0.8	5.163
0.81	5.179
0.81	5.195
0.81	5.21
0.81	5.226
0.82	5.243
0.82	5.259
0.82	5.275
0.83	5.292
0.83	5.308
0.83	5.325
0.83	5.341
0.83	5.357
0.83	5.373
0.82	5.388
0.82	5.404
0.83	5.42
0.83	5.436
0.83	5.452
0.83	5.468
0.83	5.485
0.83	5.502
0.83	5.518
0.83	5.535
0.83	5.55
0.83	5.567
0.84	5.582
0.84	5.598
0.84	5.614
0.84	5.63
0.84	5.646
0.84	5.663
0.84	5.679
0.84	5.696
0.84	5.712
0.84	5.729
0.85	5.745
0.85	5.761
0.85	5.777
0.85	5.792
0.85	5.808
0.85	5.824
0.85	5.84
0.85	5.857
0.85	5.873
0.85	5.889
0.85	5.906
0.85	5.922
0.85	5.939
0.85	5.955
0.85	5.97
0.85	5.986
0.86	6.002
0.86	6.018
0.86	6.033
0.86	6.05
0.86	6.066
0.86	6.083
0.86	6.099
0.86	6.116
0.87	6.133
0.87	6.149
0.87	6.165
0.87	6.18
0.87	6.196
0.87	6.212
0.87	6.228
0.88	6.244
0.88	6.26
0.88	6.277
0.88	6.293
0.9	6.31
0.89	6.327
0.9	6.343
0.9	6.359
0.9	6.375
0.9	6.39
0.91	6.406
0.91	6.422
0.91	6.438
0.91	6.455
0.9	6.47
0.91	6.487
0.9	6.504
0.9	6.52
0.9	6.536
0.9	6.552
0.91	6.569
0.91	6.584
0.91	6.6
0.91	6.616
0.91	6.632
0.92	6.648
0.91	6.665
0.91	6.681
0.92	6.697
0.92	6.714
0.92	6.731
0.92	6.747
0.92	6.762
0.92	6.778
0.92	6.794
0.93	6.81
0.93	6.826
0.93	6.842
0.93	6.858
0.94	6.874
0.94	6.89
0.94	6.907
0.94	6.924
0.94	6.94
0.94	6.956
0.94	6.971
0.94	6.988
0.94	7.003
0.95	7.019
0.94	7.034
0.95	7.05
0.95	7.067
0.95	7.083
0.96	7.1
0.96	7.116
0.95	7.133
0.95	7.149
0.95	7.165
0.95	7.18
0.96	7.196
0.96	7.212
0.97	7.228
0.97	7.244
0.97	7.26
0.98	7.277
0.98	7.293
0.98	7.309
0.97	7.326
0.98	7.342
0.98	7.358
0.98	7.374
0.98	7.389
0.98	7.405
0.98	7.421
0.98	7.437
0.99	7.454
1	7.469
1	7.486
1	7.502
1.01	7.519
1.01	7.536
1	7.552
1.01	7.568
1.01	7.584
1.01	7.599
1.02	7.615
1.03	7.631
1.03	7.647
1.04	7.664
1.04	7.679
1.03	7.696
1.04	7.713
1.04	7.73
1.04	7.746
1.04	7.761
1.04	7.777
1.04	7.793
1.05	7.808
1.06	7.824
1.06	7.84
1.07	7.857
1.08	7.873
1.08	7.889
1.09	7.906
1.09	7.923
1.06	7.939
1.07	7.955
1.08	7.97
1.09	7.986
1.09	8.002
1.09	8.018
1.09	8.034
1.09	8.05
1.08	8.067
1.09	8.083
1.1	8.099
1.1	8.116
1.1	8.132
1.07	8.148
1.07	8.165
1.07	8.18
1.07	8.196
1.07	8.211
1.08	8.228
1.08	8.244
1.08	8.26
1.08	8.276
1.07	8.293
1.08	8.309
1.08	8.326
1.09	8.342
1.07	8.358
1.07	8.374
1.07	8.389
1.08	8.405
1.08	8.421
1.09	8.437
1.1	8.453
-0.01	8.47
0	8.487
0	8.503
0	8.52
0	8.536
0	8.553
0	8.569
0	8.585
0	8.6
0	8.616
0	8.632
0	8.648
0	8.665
0	8.681
0	8.698
0	8.714
0	8.731
0	8.747
0	8.763
0	8.779
0	8.795
0	8.81
0	8.826
0	8.842
0	8.858
0	8.875
0	8.891
0	8.908
0	8.924
0	8.94
0	8.957
0	8.972
0	8.988
0	9.004
0	9.02
0	9.036
0	9.052
0	9.068
0	9.085
0	9.101
0	9.118
0	9.135
0	9.151
0	9.167
0	9.182
0	9.198
0	9.214
0	9.23
0	9.246
0	9.263
0	9.279
0	9.296
0	9.312
0	9.329
0	9.345
0	9.361
0	9.377
0	9.392
0	9.408
0	9.424
0	9.44
0.01	9.456
0	9.473
0	9.489
0	9.506
0	9.522
0.01	9.538
0	9.555
0	9.57
0.02	9.587
0.01	9.602
0	9.618
0	9.634
0	9.65
0	9.667
0	9.683
0.01	9.696
0	9.696
0	9.696
0	9.696
0	9.696
0	9.696
0	9.696
0	9.696
0	9.696
0	9.696
0	9.696
0	9.696
0	9.696
0	9.696
0	9.696
0	9.696
0	9.696
0	9.696
0	9.696
0	9.696
0	9.696
0	9.696
