# Supplementary material for: Mechanical and chemical element structures of sea urchin spines: specialization in ambulacral and interambulacral areas
Source: PeerJ journal article supplement (doi:10.7717/peerj-matsci.38), 2025-07-30
Supplement: FTIRambu.xlsx [file FTIRambu.xlsx]

## Sheet: ambu-base
TITLE	KBr30x30
DATA TYPE	INFRARED SPECTRUM
ORIGIN	JASCO
OWNER
SPECTROMETER/DATA SYSTEM	JASCO Corp., FT/IR-500, Rev. 1.00
RESOLUTION
DELTAX	0.964233
XUNITS	1/CM
YUNITS	TRANSMITTANCE
XYDATA
800.314	61.2031
801.278	61.2942
802.242	61.4284
803.206	61.5399
804.171	61.5546
805.135	61.4391
806.099	61.2174
807.063	60.9535
808.028	60.7207
808.992	60.576
809.956	60.5387
810.92	60.5826
811.885	60.6542
812.849	60.7096
813.813	60.7391
814.777	60.7528
815.741	60.7452
816.706	60.6855
817.67	60.5541
818.634	60.3857
819.598	60.2659
820.563	60.2721
821.527	60.4123
822.491	60.6194
823.455	60.8048
824.42	60.923
825.384	60.9844
826.348	61.0151
827.312	61.0181
828.277	60.9786
829.241	60.901
830.205	60.8288
831.169	60.8196
832.133	60.904
833.098	61.0684
834.062	61.2727
835.026	61.4833
835.99	61.6937
836.955	61.916
837.919	62.1593
838.883	62.4104
839.847	62.6296
840.812	62.7542
841.776	62.6912
842.74	62.3112
843.704	61.4739
844.668	60.1146
845.633	58.3644
846.597	56.605
847.561	55.3664
848.525	55.0851
849.49	55.8721
850.454	57.4587
851.418	59.3518
852.382	61.0812
853.347	62.3722
854.311	63.1589
855.275	63.4893
856.239	63.4361
857.203	63.0769
858.168	62.5147
859.132	61.8728
860.096	61.2472
861.06	60.659
862.025	60.0509
862.989	59.329
863.953	58.4156
864.917	57.2722
865.882	55.8928
866.846	54.2953
867.81	52.5298
868.774	50.6925
869.739	48.9185
870.703	47.3455
871.667	46.0766
872.631	45.1713
873.596	44.6701
874.56	44.6165
875.524	45.0483
876.488	45.9632
877.452	47.2907
878.417	48.9075
879.381	50.7003
880.345	52.6487
881.309	54.8742
882.274	57.6035
883.238	61.0183
884.202	65.0484
885.166	69.2449
886.13	72.8632
887.095	75.1476
888.059	75.6471
889.023	74.3809
889.987	71.7856
890.952	68.5072
891.916	65.1592
892.88	62.1606
893.844	59.7062
894.809	57.8285
895.773	56.4747
896.737	55.5588
897.701	54.9906
898.665	54.6957
899.63	54.6268
900.594	54.7573
901.558	55.0642
902.523	55.5114
903.487	56.0458
904.451	56.6018
905.415	57.1086
906.379	57.5046
907.344	57.7604
908.308	57.8979
909.272	57.9833
910.236	58.0879
911.201	58.239
912.165	58.4
913.129	58.4975
914.093	58.4785
915.058	58.3542
916.022	58.1932
916.986	58.0724
917.95	58.0273
918.914	58.04
919.879	58.0661
920.843	58.0746
921.807	58.0659
922.771	58.0605
923.736	58.077
924.7	58.125
925.664	58.2153
926.628	58.3682
927.592	58.6018
928.557	58.9067
929.521	59.2276
930.485	59.4811
931.449	59.5988
932.414	59.5724
933.378	59.4643
934.342	59.374
935.306	59.3881
936.271	59.5442
937.235	59.8276
938.199	60.1894
939.163	60.5703
940.128	60.9184
941.092	61.2056
942.056	61.4345
943.02	61.6357
943.985	61.8509
944.949	62.1126
945.913	62.4282
946.877	62.7786
947.841	63.1306
948.806	63.4552
949.77	63.7423
950.734	64.0021
951.698	64.2523
952.663	64.5029
953.627	64.7533
954.591	65.0006
955.555	65.2485
956.519	65.5017
957.484	65.756
958.448	65.9989
959.412	66.224
960.376	66.4462
961.341	66.6971
962.305	67.0034
963.269	67.3655
964.233	67.7554
965.198	68.134
966.162	68.4711
967.126	68.7529
968.09	68.9739
969.055	69.1258
970.019	69.1974
970.983	69.1902
971.947	69.1319
972.912	69.0713
973.876	69.0528
974.84	69.0901
975.804	69.1612
976.768	69.2273
977.733	69.2582
978.697	69.2433
979.661	69.1857
980.625	69.0904
981.59	68.9623
982.554	68.8109
983.518	68.6499
984.482	68.4866
985.447	68.3111
986.411	68.1015
987.375	67.843
988.339	67.5457
989.303	67.2416
990.268	66.9632
991.232	66.7219
992.196	66.5038
993.16	66.2829
994.125	66.0401
995.089	65.7758
996.053	65.51
997.017	65.272
997.982	65.0853
998.946	64.9524
999.91	64.8502
1000.87	64.7437
1001.84	64.6134
1002.8	64.4751
1003.77	64.375
1004.73	64.3585
1005.7	64.4365
1006.66	64.5737
1007.62	64.7095
1008.59	64.7974
1009.55	64.8318
1010.52	64.846
1011.48	64.887
1012.45	64.9898
1013.41	65.1687
1014.37	65.4212
1015.34	65.7302
1016.3	66.0602
1017.27	66.3585
1018.23	66.5719
1019.19	66.674
1020.16	66.6815
1021.12	66.6421
1022.09	66.603
1023.05	66.5844
1024.02	66.5769
1024.98	66.5627
1025.94	66.5386
1026.91	66.5199
1027.87	66.5226
1028.84	66.544
1029.8	66.5602
1030.77	66.5442
1031.73	66.4907
1032.69	66.426
1033.66	66.3949
1034.62	66.4303
1035.59	66.5243
1036.55	66.6219
1037.52	66.6447
1038.48	66.5371
1039.44	66.3069
1040.41	66.0289
1041.37	65.8028
1042.34	65.6952
1043.3	65.7052
1044.26	65.7759
1045.23	65.8382
1046.19	65.8531
1047.16	65.8222
1048.12	65.772
1049.09	65.7336
1050.05	65.7321
1051.01	65.7843
1051.98	65.8947
1052.94	66.0555
1053.91	66.2533
1054.87	66.4793
1055.84	66.7276
1056.8	66.9788
1057.76	67.1851
1058.73	67.2797
1059.69	67.2112
1060.66	66.9745
1061.62	66.6098
1062.59	66.1725
1063.55	65.7003
1064.51	65.2037
1065.48	64.6776
1066.44	64.1158
1067.41	63.5125
1068.37	62.8545
1069.33	62.119
1070.3	61.2878
1071.26	60.3628
1072.23	59.3696
1073.19	58.3445
1074.16	57.3211
1075.12	56.3268
1076.08	55.3858
1077.05	54.5173
1078.01	53.7243
1078.98	52.9858
1079.94	52.2663
1080.91	51.5402
1081.87	50.8168
1082.83	50.1464
1083.8	49.6073
1084.76	49.2841
1085.73	49.2482
1086.69	49.541
1087.66	50.1615
1088.62	51.0588
1089.58	52.1366
1090.55	53.2765
1091.51	54.3711
1092.48	55.3539
1093.44	56.2046
1094.4	56.9313
1095.37	57.5434
1096.33	58.0353
1097.3	58.3903
1098.26	58.5979
1099.23	58.6702
1100.19	58.6436
1101.15	58.5631
1102.12	58.4575
1103.08	58.3223
1104.05	58.1264
1105.01	57.841
1105.98	57.4693
1106.94	57.0563
1107.9	56.6674
1108.87	56.3568
1109.83	56.1448
1110.8	56.0171
1111.76	55.9392
1112.73	55.875
1113.69	55.8009
1114.65	55.7098
1115.62	55.6041
1116.58	55.4856
1117.55	55.3493
1118.51	55.1892
1119.47	55.009
1120.44	54.8264
1121.4	54.6615
1122.37	54.5173
1123.33	54.369
1124.3	54.175
1125.26	53.9059
1126.22	53.5681
1127.19	53.203
1128.15	52.859
1129.12	52.559
1130.08	52.2883
1131.05	52.0102
1132.01	51.696
1132.97	51.3447
1133.94	50.9803
1134.9	50.6348
1135.87	50.3311
1136.83	50.0777
1137.8	49.8728
1138.76	49.7088
1139.72	49.5756
1140.69	49.461
1141.65	49.3533
1142.62	49.2445
1143.58	49.1351
1144.55	49.0368
1145.51	48.9717
1146.47	48.9648
1147.44	49.0298
1148.4	49.1579
1149.37	49.3178
1150.33	49.4705
1151.29	49.5899
1152.26	49.673
1153.22	49.7329
1154.19	49.7836
1155.15	49.8293
1156.12	49.864
1157.08	49.8803
1158.04	49.8764
1159.01	49.8611
1159.97	49.8529
1160.94	49.8757
1161.9	49.9499
1162.87	50.0814
1163.83	50.2545
1164.79	50.4354
1165.76	50.5884
1166.72	50.6931
1167.69	50.7563
1168.65	50.8066
1169.62	50.8803
1170.58	51.0064
1171.54	51.1989
1172.51	51.4574
1173.47	51.7703
1174.44	52.1186
1175.4	52.4798
1176.36	52.8323
1177.33	53.1613
1178.29	53.4654
1179.26	53.7578
1180.22	54.0592
1181.19	54.3827
1182.15	54.7227
1183.11	55.0573
1184.08	55.3649
1185.04	55.6398
1186.01	55.8966
1186.97	56.1593
1187.94	56.4475
1188.9	56.7693
1189.86	57.1232
1190.83	57.5017
1191.79	57.8917
1192.76	58.2771
1193.72	58.6441
1194.69	58.9917
1195.65	59.336
1196.61	59.703
1197.58	60.1105
1198.54	60.5501
1199.51	60.9853
1200.47	61.3686
1201.43	61.6693
1202.4	61.889
1203.36	62.057
1204.33	62.2092
1205.29	62.3689
1206.26	62.5394
1207.22	62.7123
1208.18	62.8809
1209.15	63.0485
1210.11	63.2253
1211.08	63.416
1212.04	63.6133
1213.01	63.8047
1213.97	63.9895
1214.93	64.1867
1215.9	64.423
1216.86	64.7076
1217.83	65.0179
1218.79	65.3068
1219.76	65.528
1220.72	65.6578
1221.68	65.6998
1222.65	65.6743
1223.61	65.6051
1224.58	65.5104
1225.54	65.4029
1226.5	65.2903
1227.47	65.1765
1228.43	65.0583
1229.4	64.9268
1230.36	64.7736
1231.33	64.5994
1232.29	64.4189
1233.25	64.2538
1234.22	64.1202
1235.18	64.019
1236.15	63.9371
1237.11	63.8566
1238.08	63.7658
1239.04	63.6653
1240	63.5655
1240.97	63.4784
1241.93	63.4122
1242.9	63.3696
1243.86	63.3517
1244.83	63.3606
1245.79	63.4005
1246.75	63.4758
1247.72	63.5886
1248.68	63.7346
1249.65	63.9015
1250.61	64.073
1251.58	64.2374
1252.54	64.3951
1253.5	64.5571
1254.47	64.7329
1255.43	64.9178
1256.4	65.09
1257.36	65.2197
1258.32	65.2824
1259.29	65.27
1260.25	65.193
1261.22	65.0736
1262.18	64.935
1263.15	64.7935
1264.11	64.6586
1265.07	64.5374
1266.04	64.4383
1267	64.3714
1267.97	64.344
1268.93	64.3534
1269.9	64.3808
1270.86	64.393
1271.82	64.3577
1272.79	64.2613
1273.75	64.1151
1274.72	63.9423
1275.68	63.7591
1276.64	63.5664
1277.61	63.3562
1278.57	63.1247
1279.54	62.8795
1280.5	62.6354
1281.47	62.403
1282.43	62.1838
1283.39	61.9746
1284.36	61.7786
1285.32	61.6144
1286.29	61.5128
1287.25	61.5005
1288.22	61.5814
1289.18	61.7285
1290.14	61.8974
1291.11	62.0453
1292.07	62.1465
1293.04	62.1951
1294	62.2033
1294.97	62.195
1295.93	62.1955
1296.89	62.2169
1297.86	62.2499
1298.82	62.2687
1299.79	62.2465
1300.75	62.1679
1301.72	62.0307
1302.68	61.8383
1303.64	61.5933
1304.61	61.2977
1305.57	60.958
1306.54	60.5863
1307.5	60.1942
1308.46	59.7833
1309.43	59.3442
1310.39	58.8689
1311.36	58.3689
1312.32	57.884
1313.29	57.4672
1314.25	57.1522
1315.21	56.9334
1316.18	56.7736
1317.14	56.6281
1318.11	56.4653
1319.07	56.2787
1320.04	56.084
1321	55.9071
1321.96	55.7719
1322.93	55.6912
1323.89	55.6613
1324.86	55.6594
1325.82	55.6508
1326.79	55.6029
1327.75	55.4979
1328.71	55.3334
1329.68	55.1141
1330.64	54.8443
1331.61	54.527
1332.57	54.1669
1333.53	53.7716
1334.5	53.3456
1335.46	52.8848
1336.43	52.3807
1337.39	51.8434
1338.36	51.3305
1339.32	50.9273
1340.28	50.6631
1341.25	50.4755
1342.21	50.272
1343.18	49.9911
1344.14	49.6121
1345.11	49.1391
1346.07	48.5809
1347.03	47.9395
1348	47.2202
1348.96	46.4489
1349.93	45.6742
1350.89	44.9418
1351.86	44.2677
1352.82	43.6349
1353.78	43.0155
1354.75	42.3965
1355.71	41.7892
1356.68	41.2142
1357.64	40.6793
1358.6	40.1685
1359.57	39.6459
1360.53	39.0758
1361.5	38.4601
1362.46	37.8638
1363.43	37.3626
1364.39	36.9684
1365.35	36.6352
1366.32	36.3105
1367.28	35.9674
1368.25	35.6138
1369.21	35.2811
1370.18	34.9981
1371.14	34.7701
1372.1	34.5777
1373.07	34.3833
1374.03	34.1483
1375	33.8603
1375.96	33.5403
1376.93	33.2203
1377.89	32.9255
1378.85	32.6741
1379.82	32.4769
1380.78	32.333
1381.75	32.2294
1382.71	32.1486
1383.67	32.0804
1384.64	32.0294
1385.6	32.0148
1386.57	32.0561
1387.53	32.1467
1388.5	32.2533
1389.46	32.3507
1390.42	32.4416
1391.39	32.5499
1392.35	32.7065
1393.32	32.9345
1394.28	33.234
1395.25	33.5858
1396.21	33.9786
1397.17	34.4113
1398.14	34.8543
1399.1	35.2438
1400.07	35.5367
1401.03	35.7549
1402	35.9702
1402.96	36.2598
1403.92	36.6533
1404.89	37.0973
1405.85	37.4934
1406.82	37.789
1407.78	38.007
1408.74	38.1982
1409.71	38.3909
1410.67	38.5713
1411.64	38.6972
1412.6	38.7346
1413.57	38.6834
1414.53	38.5786
1415.49	38.48
1416.46	38.4601
1417.42	38.5607
1418.39	38.7128
1419.35	38.7668
1420.32	38.6647
1421.28	38.464
1422.24	38.2366
1423.21	38.0204
1424.17	37.8202
1425.14	37.624
1426.1	37.4217
1427.07	37.2118
1428.03	36.9956
1428.99	36.7694
1429.96	36.5264
1430.92	36.27
1431.89	36.0234
1432.85	35.8237
1433.82	35.7121
1434.78	35.7106
1435.74	35.7742
1436.71	35.786
1437.67	35.6793
1438.64	35.5016
1439.6	35.3245
1440.56	35.1827
1441.53	35.0761
1442.49	34.9909
1443.46	34.9214
1444.42	34.8833
1445.39	34.908
1446.35	35.0166
1447.31	35.1857
1448.28	35.3479
1449.24	35.4436
1450.21	35.4603
1451.17	35.417
1452.14	35.3384
1453.1	35.2545
1454.06	35.2294
1455.03	35.4132
1455.99	36.0168
1456.96	36.8739
1457.92	37.3218
1458.89	37.2706
1459.85	37.0464
1460.81	36.8435
1461.78	36.7397
1462.74	36.7724
1463.71	36.9358
1464.67	37.1396
1465.63	37.2515
1466.6	37.2214
1467.56	37.096
1468.53	36.9473
1469.49	36.8477
1470.46	36.8885
1471.42	37.1758
1472.38	37.6968
1473.35	38.1645
1474.31	38.3115
1475.28	38.1903
1476.24	37.9673
1477.21	37.7546
1478.17	37.6106
1479.13	37.5621
1480.1	37.6046
1481.06	37.6969
1482.03	37.7788
1482.99	37.8096
1483.96	37.7906
1484.92	37.7589
1485.88	37.7775
1486.85	37.9364
1487.81	38.3181
1488.78	38.8447
1489.74	39.2306
1490.7	39.3235
1491.67	39.2228
1492.63	39.0757
1493.6	38.9944
1494.56	39.0723
1495.53	39.3703
1496.49	39.8185
1497.45	40.1697
1498.42	40.2411
1499.38	40.0982
1500.35	39.8865

## Sheet: ambu-shaft
TITLE	KBr30x30
DATA TYPE	INFRARED SPECTRUM
ORIGIN	JASCO
OWNER
SPECTROMETER/DATA SYSTEM	JASCO Corp., FT/IR-500, Rev. 1.00
RESOLUTION
DELTAX	0.964233
XUNITS	1/CM
YUNITS	TRANSMITTANCE
XYDATA
800.314	70.3593
801.278	70.43
802.242	70.6549
803.206	70.8825
804.171	70.9619
805.135	70.8503
806.099	70.6322
807.063	70.442
808.028	70.3662
808.992	70.4005
809.956	70.4703
810.92	70.4845
811.885	70.3865
812.849	70.18
813.813	69.9186
814.777	69.6648
815.741	69.4495
816.706	69.2628
817.67	69.0873
818.634	68.9389
819.598	68.8773
820.563	68.9698
821.527	69.2407
822.491	69.6481
823.455	70.1047
824.42	70.5219
825.384	70.8405
826.348	71.0313
827.312	71.0855
828.277	71.0187
829.241	70.8833
830.205	70.7658
831.169	70.7569
832.133	70.9112
833.098	71.2245
834.062	71.6421
835.026	72.0908
835.99	72.5172
836.955	72.9062
837.919	73.2698
838.883	73.6201
839.847	73.9442
840.812	74.1921
841.776	74.2643
842.74	74.0037
843.704	73.2314
844.668	71.8546
845.633	70.0138
846.597	68.1447
847.561	66.8502
848.525	66.6136
849.49	67.538
850.454	69.3043
851.418	71.3702
852.382	73.2577
853.347	74.7349
854.311	75.8137
855.275	76.6246
856.239	77.2941
857.203	77.8888
858.168	78.412
859.132	78.808
860.096	78.9718
861.06	78.7849
862.025	78.1776
862.989	77.1798
863.953	75.9135
864.917	74.5263
865.882	73.111
866.846	71.6752
867.81	70.1774
868.774	68.5979
869.739	66.9971
870.703	65.5218
871.667	64.3664
872.631	63.7164
873.596	63.6995
874.56	64.3542
875.524	65.6155
876.488	67.325
877.452	69.2646
878.417	71.2115
879.381	73.007
880.345	74.6338
881.309	76.2738
882.274	78.2849
883.238	81.036
884.202	84.6361
885.166	88.7252
886.13	92.5151
887.095	95.1054
888.059	95.8853
889.023	94.7785
889.987	92.2215
890.952	88.9283
891.916	85.5928
892.88	82.6799
893.844	80.3867
894.809	78.7245
895.773	77.6159
896.737	76.9476
897.701	76.5872
898.665	76.4013
899.63	76.2839
900.594	76.1784
901.558	76.0804
902.523	76.0196
903.487	76.0336
904.451	76.1355
905.415	76.2906
906.379	76.4207
907.344	76.4472
908.308	76.3457
909.272	76.1627
910.236	75.9732
911.201	75.8129
912.165	75.6499
913.129	75.4198
914.093	75.0939
915.058	74.7182
916.022	74.3872
916.986	74.1767
917.95	74.0946
918.914	74.0833
919.879	74.0623
920.843	73.9757
921.807	73.812
922.771	73.5949
923.736	73.3666
924.7	73.1789
925.664	73.0848
926.628	73.1191
927.592	73.2738
928.557	73.4893
929.521	73.6754
930.485	73.7531
931.449	73.6883
932.414	73.5021
933.378	73.2554
934.342	73.0231
935.306	72.8743
936.271	72.8571
937.235	72.9872
938.199	73.2415
939.163	73.5657
940.128	73.9011
941.092	74.2206
942.056	74.545
943.02	74.9258
943.985	75.4052
944.949	75.9875
945.913	76.6381
946.877	77.3059
947.841	77.9445
948.806	78.5202
949.77	79.0086
950.734	79.3935
951.698	79.6695
952.663	79.8457
953.627	79.9474
954.591	80.0124
955.555	80.0796
956.519	80.171
957.484	80.2813
958.448	80.3869
959.412	80.4672
960.376	80.5233
961.341	80.5739
962.305	80.6376
963.269	80.7201
964.233	80.8154
965.198	80.9142
966.162	81.0061
967.126	81.074
968.09	81.0915
969.055	81.0319
970.019	80.8821
970.983	80.657
971.947	80.4016
972.912	80.1776
973.876	80.0385
974.84	80.0047
975.804	80.0516
976.768	80.1188
977.733	80.1359
978.697	80.0515
979.661	79.8487
980.625	79.5431
981.59	79.1704
982.554	78.7709
983.518	78.3776
984.482	78.0082
985.447	77.6642
986.411	77.3413
987.375	77.0447
988.339	76.7967
989.303	76.625
990.268	76.5385
991.232	76.5098
992.196	76.4791
993.16	76.3818
994.125	76.1803
995.089	75.8829
996.053	75.5395
997.017	75.2153
997.982	74.9582
998.946	74.7733
999.91	74.6215
1000.87	74.4469
1001.84	74.2203
1002.8	73.9676
1003.77	73.7595
1004.73	73.6652
1005.7	73.7029
1006.66	73.8238
1007.62	73.9411
1008.59	73.9856
1009.55	73.9447
1010.52	73.86
1011.48	73.7928
1012.45	73.7878
1013.41	73.8609
1014.37	74.0051
1015.34	74.1966
1016.3	74.394
1017.27	74.5418
1018.23	74.5889
1019.19	74.5183
1020.16	74.3629
1021.12	74.188
1022.09	74.0524
1023.05	73.9749
1024.02	73.9313
1024.98	73.8818
1025.94	73.8027
1026.91	73.6951
1027.87	73.5667
1028.84	73.4122
1029.8	73.212
1030.77	72.9543
1031.73	72.6545
1032.69	72.3539
1033.66	72.0966
1034.62	71.8997
1035.59	71.7364
1036.55	71.5406
1037.52	71.2345
1038.48	70.7722
1039.44	70.1802
1040.41	69.5629
1041.37	69.0584
1042.34	68.7666
1043.3	68.6976
1044.26	68.7743
1045.23	68.8885
1046.19	68.9655
1047.16	68.9921
1048.12	68.9939
1049.09	68.9945
1050.05	68.9917
1051.01	68.9638
1051.98	68.8942
1052.94	68.7915
1053.91	68.6952
1054.87	68.6599
1055.84	68.7242
1056.8	68.8761
1057.76	69.0384
1058.73	69.0943
1059.69	68.9438
1060.66	68.5572
1061.62	67.986
1062.59	67.325
1063.55	66.6552
1064.51	66.0109
1065.48	65.3832
1066.44	64.7456
1067.41	64.0756
1068.37	63.3601
1069.33	62.5912
1070.3	61.7661
1071.26	60.8914
1072.23	59.9817
1073.19	59.0536
1074.16	58.1215
1075.12	57.2038
1076.08	56.3284
1077.05	55.5259
1078.01	54.8077
1078.98	54.1493
1079.94	53.5009
1080.91	52.826
1081.87	52.1425
1082.83	51.5346
1083.8	51.128
1084.76	51.0433
1085.73	51.3557
1086.69	52.0754
1087.66	53.1516
1088.62	54.4886
1089.58	55.9649
1090.55	57.4511
1091.51	58.8288
1092.48	60.0099
1093.44	60.953
1094.4	61.6676
1095.37	62.2014
1096.33	62.6146
1097.3	62.9514
1098.26	63.2246
1099.23	63.4223
1100.19	63.5302
1101.15	63.5522
1102.12	63.5094
1103.08	63.4222
1104.05	63.2916
1105.01	63.1026
1105.98	62.8478
1106.94	62.5526
1107.9	62.277
1108.87	62.0891
1109.83	62.0268
1110.8	62.074
1111.76	62.1685
1112.73	62.2395
1113.69	62.2484
1114.65	62.2048
1115.62	62.1436
1116.58	62.0863
1117.55	62.0206
1118.51	61.9168
1119.47	61.7646
1120.44	61.5943
1121.4	61.4597
1122.37	61.3967
1123.33	61.3927
1124.3	61.3948
1125.26	61.3507
1126.22	61.2459
1127.19	61.1068
1128.15	60.9702
1129.12	60.8497
1130.08	60.7291
1131.05	60.5844
1132.01	60.4104
1132.97	60.2251
1133.94	60.052
1134.9	59.9001
1135.87	59.7594
1136.83	59.6144
1137.8	59.4603
1138.76	59.3075
1139.72	59.1734
1140.69	59.0715
1141.65	59.0058
1142.62	58.9709
1143.58	58.9577
1144.55	58.9624
1145.51	58.9929
1146.47	59.0681
1147.44	59.2033
1148.4	59.3929
1149.37	59.6037
1150.33	59.788
1151.29	59.9086
1152.26	59.9561
1153.22	59.9484
1154.19	59.9157
1155.15	59.8846
1156.12	59.8699
1157.08	59.8749
1158.04	59.8947
1159.01	59.9232
1159.97	59.9594
1160.94	60.0109
1161.9	60.0902
1162.87	60.2067
1163.83	60.3579
1164.79	60.5242
1165.76	60.6734
1166.72	60.7733
1167.69	60.8075
1168.65	60.7884
1169.62	60.754
1170.58	60.7532
1171.54	60.825
1172.51	60.9861
1173.47	61.229
1174.44	61.5296
1175.4	61.8577
1176.36	62.1826
1177.33	62.4778
1178.29	62.7276
1179.26	62.9348
1180.22	63.1228
1181.19	63.3271
1182.15	63.5802
1183.11	63.8987
1184.08	64.2804
1185.04	64.7065
1186.01	65.1477
1186.97	65.5738
1187.94	65.9683
1188.9	66.3398
1189.86	66.719
1190.83	67.138
1191.79	67.6069
1192.76	68.1054
1193.72	68.5994
1194.69	69.0693
1195.65	69.5283
1196.61	70.014
1197.58	70.558
1198.54	71.1574
1199.51	71.7713
1200.47	72.345
1201.43	72.846
1202.4	73.2808
1203.36	73.6814
1204.33	74.0737
1205.29	74.4565
1206.26	74.8042
1207.22	75.0912
1208.18	75.3148
1209.15	75.4994
1210.11	75.677
1211.08	75.8633
1212.04	76.049
1213.01	76.2175
1213.97	76.3704
1214.93	76.5347
1215.9	76.7394
1216.86	76.985
1217.83	77.2346
1218.79	77.4383
1219.76	77.569
1220.72	77.6394
1221.68	77.6872
1222.65	77.7465
1223.61	77.8299
1224.58	77.9327
1225.54	78.0505
1226.5	78.1918
1227.47	78.374
1228.43	78.6064
1229.4	78.8784
1230.36	79.1641
1231.33	79.4413
1232.29	79.7064
1233.25	79.9732
1234.22	80.2568
1235.18	80.5561
1236.15	80.8481
1237.11	81.0964
1238.08	81.2675
1239.04	81.3478
1240	81.3489
1240.97	81.3005
1241.93	81.2339
1242.9	81.1692
1243.86	81.114
1244.83	81.0741
1245.79	81.0636
1246.75	81.1042
1247.72	81.2126
1248.68	81.386
1249.65	81.5987
1250.61	81.8171
1251.58	82.0207
1252.54	82.2129
1253.5	82.4113
1254.47	82.6263
1255.43	82.8493
1256.4	83.0582
1257.36	83.2305
1258.32	83.3509
1259.29	83.4087
1260.25	83.3945
1261.22	83.3023
1262.18	83.1373
1263.15	82.9176
1264.11	82.6716
1265.07	82.4291
1266.04	82.2132
1267	82.034
1267.97	81.8856
1268.93	81.7491
1269.9	81.5967
1270.86	81.4004
1271.82	81.1444
1272.79	80.8346
1273.75	80.4982
1274.72	80.1684
1275.68	79.868
1276.64	79.6003
1277.61	79.3535
1278.57	79.1137
1279.54	78.874
1280.5	78.6349
1281.47	78.3988
1282.43	78.1669
1283.39	77.9411
1284.36	77.7293
1285.32	77.5459
1286.29	77.4043
1287.25	77.3056
1288.22	77.2332
1289.18	77.1582
1290.14	77.0525
1291.11	76.8979
1292.07	76.6868
1293.04	76.4205
1294	76.1091
1294.97	75.7719
1295.93	75.4318
1296.89	75.1046
1297.86	74.7925
1298.82	74.4888
1299.79	74.1874
1300.75	73.8894
1301.72	73.6002
1302.68	73.3236
1303.64	73.0588
1304.61	72.8009
1305.57	72.5425
1306.54	72.2722
1307.5	71.9764
1308.46	71.6442
1309.43	71.2727
1310.39	70.8679
1311.36	70.4437
1312.32	70.0229
1313.29	69.6367
1314.25	69.3187
1315.21	69.0924
1316.18	68.9571
1317.14	68.878
1318.11	68.7908
1319.07	68.631
1320.04	68.3737
1321	68.0445
1321.96	67.6928
1322.93	67.3573
1323.89	67.0492
1324.86	66.7541
1325.82	66.4439
1326.79	66.0911
1327.75	65.6817
1328.71	65.22
1329.68	64.7284
1330.64	64.2389
1331.61	63.7799
1332.57	63.3657
1333.53	62.9954
1334.5	62.6588
1335.46	62.3398
1336.43	62.011
1337.39	61.6239
1338.36	61.1202
1339.32	60.479
1340.28	59.7502
1341.25	59.0091
1342.21	58.3008
1343.18	57.6392
1344.14	57.0293
1345.11	56.4765
1346.07	55.98
1347.03	55.5262
1348	55.0928
1348.96	54.662
1349.93	54.227
1350.89	53.786
1351.86	53.332
1352.82	52.8516
1353.78	52.3346
1354.75	51.7858
1355.71	51.2263
1356.68	50.6816
1357.64	50.1651
1358.6	49.6697
1359.57	49.1629
1360.53	48.59
1361.5	47.9028
1362.46	47.1175
1363.43	46.3202
1364.39	45.5825
1365.35	44.9088
1366.32	44.2644
1367.28	43.6209
1368.25	42.9826
1369.21	42.382
1370.18	41.8496
1371.14	41.3886
1372.1	40.9733
1373.07	40.5638
1374.03	40.1291
1375	39.6693
1375.96	39.21
1376.93	38.7771
1377.89	38.3868
1378.85	38.0517
1379.82	37.7822
1380.78	37.5824
1381.75	37.4485
1382.71	37.3742
1383.67	37.3589
1384.64	37.4129
1385.6	37.55
1386.57	37.7647
1387.53	38.0132
1388.5	38.2415
1389.46	38.433
1390.42	38.615
1391.39	38.8378
1392.35	39.1564
1393.32	39.6067
1394.28	40.1698
1395.25	40.7708
1396.21	41.3453
1397.17	41.8849
1398.14	42.3929
1399.1	42.8453
1400.07	43.2265
1401.03	43.5745
1402	43.9756
1402.96	44.5185
1403.92	45.2282
1404.89	46.0196
1405.85	46.7549
1406.82	47.3668
1407.78	47.8869
1408.74	48.3708
1409.71	48.8322
1410.67	49.2354
1411.64	49.5372
1412.6	49.7326
1413.57	49.8607
1414.53	49.9762
1415.49	50.1259
1416.46	50.3267
1417.42	50.5332
1418.39	50.6355
1419.35	50.572
1420.32	50.405
1421.28	50.2195
1422.24	50.0462
1423.21	49.8745
1424.17	49.6888
1425.14	49.4905
1426.1	49.2956
1427.07	49.1181
1428.03	48.9594
1428.99	48.8066
1429.96	48.6452
1430.92	48.4778
1431.89	48.3287
1432.85	48.2279
1433.82	48.1925
1434.78	48.2017
1435.74	48.1748
1436.71	48.0276
1437.67	47.7844
1438.64	47.5458
1439.6	47.3822
1440.56	47.3114
1441.53	47.3198
1442.49	47.3805
1443.46	47.4716
1444.42	47.592
1445.39	47.761
1446.35	47.9974
1447.31	48.2905
1448.28	48.5979
1449.24	48.8831
1450.21	49.1409
1451.17	49.3835
1452.14	49.6218
1453.1	49.8716
1454.06	50.1823
1455.03	50.6716
1455.99	51.4496
1456.96	52.2287
1457.92	52.4767
1458.89	52.3125
1459.85	52.0836
1460.81	51.9449
1461.78	51.9458
1462.74	52.1007
1463.71	52.3722
1464.67	52.6445
1465.63	52.7968
1466.6	52.821
1467.56	52.7966
1468.53	52.811
1469.49	52.9474
1470.46	53.3052
1471.42	53.9639
1472.38	54.7887
1473.35	55.343
1474.31	55.3897
1475.28	55.1263
1476.24	54.7996
1477.21	54.5352
1478.17	54.3807
1479.13	54.3464
1480.1	54.4121
1481.06	54.5281
1482.03	54.6392
1482.99	54.7211
1483.96	54.7955
1484.92	54.9184
1485.88	55.1674
1486.85	55.6264
1487.81	56.3057
1488.78	56.9759
1489.74	57.288
1490.7	57.2199
1491.67	57.0027
1492.63	56.8205
1493.6	56.7755
1494.56	56.9382
1495.53	57.3357
1496.49	57.8583
1497.45	58.2441
1498.42	58.3408
1499.38	58.2463
1500.35	58.1108
