# Supplementary material for: Mechanical and chemical element structures of sea urchin spines: specialization in ambulacral and interambulacral areas
Source: PeerJ journal article supplement (doi:10.7717/peerj-matsci.38), 2025-07-30
Supplement: FTIRinterambu.xlsx [file FTIRinterambu.xlsx]

## Sheet: interambu-base
TITLE	KBr30x30
DATA TYPE	INFRARED SPECTRUM
ORIGIN	JASCO
OWNER
SPECTROMETER/DATA SYSTEM	JASCO Corp., FT/IR-500, Rev. 1.00
RESOLUTION
DELTAX	0.964233
XUNITS	1/CM
YUNITS	TRANSMITTANCE
XYDATA
800.314	48.929
801.278	48.9637
802.242	49.1705
803.206	49.5247
804.171	49.9196
805.135	50.237
806.099	50.4153
807.063	50.4713
808.028	50.4721
808.992	50.4839
809.956	50.529
810.92	50.5739
811.885	50.5569
812.849	50.4343
813.813	50.2113
814.777	49.9287
815.741	49.6256
816.706	49.3179
817.67	49.0115
818.634	48.7294
819.598	48.516
820.563	48.4104
821.527	48.4146
822.491	48.4919
823.455	48.5944
824.42	48.6951
825.384	48.7908
826.348	48.8773
827.312	48.9271
828.277	48.8984
829.241	48.7649
830.205	48.5401
831.169	48.2712
832.133	48.0132
833.098	47.8028
834.062	47.6488
835.026	47.5415
835.99	47.4699
836.955	47.4278
837.919	47.4063
838.883	47.3761
839.847	47.2781
840.812	47.0279
841.776	46.5303
842.74	45.7031
843.704	44.5135
844.668	43.0255
845.633	41.4359
846.597	40.0559
847.561	39.209
848.525	39.0864
849.49	39.6463
850.454	40.6352
851.418	41.7224
852.382	42.6595
853.347	43.3697
854.311	43.922
855.275	44.4321
856.239	44.9674
857.203	45.5163
858.168	46.0203
859.132	46.4211
860.096	46.6831
861.06	46.7789
862.025	46.6623
862.989	46.2532
863.953	45.4542
864.917	44.1935
865.882	42.4732
866.846	40.3993
867.81	38.1699
868.774	36.0201
869.739	34.1497
870.703	32.6719
871.667	31.6148
872.631	30.9661
873.596	30.7193
874.56	30.8843
875.524	31.4632
876.488	32.4219
877.452	33.6907
878.417	35.1997
879.381	36.9286
880.345	38.9451
881.309	41.4084
882.274	44.5174
883.238	48.392
884.202	52.9208
885.166	57.6721
886.13	61.9624
887.095	65.0855
888.059	66.5807
889.023	66.3932
889.987	64.8606
890.952	62.5512
891.916	60.0416
892.88	57.7382
893.844	55.8182
894.809	54.2816
895.773	53.046
896.737	52.0243
897.701	51.162
898.665	50.4417
899.63	49.8693
900.594	49.4546
901.558	49.201
902.523	49.1069
903.487	49.1685
904.451	49.3704
905.415	49.6697
906.379	49.9927
907.344	50.263
908.308	50.4448
909.272	50.5597
910.236	50.6575
911.201	50.7608
912.165	50.8373
913.129	50.8258
914.093	50.696
915.058	50.4863
916.022	50.2826
916.986	50.1556
917.95	50.1138
918.914	50.1061
919.879	50.0677
920.843	49.9696
921.807	49.8346
922.771	49.7134
923.736	49.6494
924.7	49.658
925.664	49.731
926.628	49.8525
927.592	50.0103
928.557	50.1975
929.521	50.4033
930.485	50.6061
931.449	50.7727
932.414	50.8721
933.378	50.8933
934.342	50.8588
935.306	50.8197
936.271	50.8343
937.235	50.9388
938.199	51.1276
939.163	51.356
940.128	51.569
941.092	51.7385
942.056	51.8829
943.02	52.0504
943.985	52.2831
944.949	52.5894
945.913	52.9431
946.877	53.3032
947.841	53.6351
948.806	53.9185
949.77	54.1442
950.734	54.3106
951.698	54.4226
952.663	54.4927
953.627	54.5411
954.591	54.5939
955.555	54.6756
956.519	54.7978
957.484	54.951
958.448	55.1093
959.412	55.2469
960.376	55.3566
961.341	55.4564
962.305	55.5804
963.269	55.7616
964.233	56.0154
965.198	56.3318
966.162	56.6763
967.126	56.9981
968.09	57.2463
969.055	57.3882
970.019	57.4224
970.983	57.382
971.947	57.3228
972.912	57.302
973.876	57.3535
974.84	57.4743
975.804	57.6286
976.768	57.7672
977.733	57.8512
978.697	57.8657
979.661	57.8178
980.625	57.7232
981.59	57.5958
982.554	57.4482
983.518	57.2962
984.482	57.1587
985.447	57.049
986.411	56.9682
987.375	56.9092
988.339	56.8706
989.303	56.863
990.268	56.9007
991.232	56.9834
992.196	57.0849
993.16	57.1621
994.125	57.1805
995.089	57.1363
996.053	57.0583
997.017	56.9866
997.982	56.9439
998.946	56.9195
999.91	56.8775
1000.87	56.7839
1001.84	56.6333
1002.8	56.4557
1003.77	56.299
1004.73	56.1997
1005.7	56.1656
1006.66	56.177
1007.62	56.204
1008.59	56.2245
1009.55	56.2337
1010.52	56.2415
1011.48	56.2643
1012.45	56.3174
1013.41	56.4103
1014.37	56.5424
1015.34	56.6972
1016.3	56.841
1017.27	56.9327
1018.23	56.9443
1019.19	56.8781
1020.16	56.7657
1021.12	56.6476
1022.09	56.5503
1023.05	56.4764
1024.02	56.4146
1024.98	56.3563
1025.94	56.306
1026.91	56.2791
1027.87	56.2894
1028.84	56.3378
1029.8	56.4069
1030.77	56.4656
1031.73	56.4842
1032.69	56.4518
1033.66	56.388
1034.62	56.3306
1035.59	56.3073
1036.55	56.3087
1037.52	56.2879
1038.48	56.1953
1039.44	56.0228
1040.41	55.8202
1041.37	55.6646
1042.34	55.6067
1043.3	55.6381
1044.26	55.7022
1045.23	55.7378
1046.19	55.7166
1047.16	55.6488
1048.12	55.5629
1049.09	55.4866
1050.05	55.4421
1051.01	55.4477
1051.98	55.515
1052.94	55.6416
1053.91	55.8117
1054.87	56.0054
1055.84	56.2044
1056.8	56.3834
1057.76	56.4965
1058.73	56.4805
1059.69	56.2832
1060.66	55.8965
1061.62	55.3647
1062.59	54.758
1063.55	54.1333
1064.51	53.5136
1065.48	52.8949
1066.44	52.2644
1067.41	51.6084
1068.37	50.9063
1069.33	50.1277
1070.3	49.2478
1071.26	48.2699
1072.23	47.232
1073.19	46.1893
1074.16	45.1903
1075.12	44.267
1076.08	43.4394
1077.05	42.7157
1078.01	42.0798
1078.98	41.4828
1079.94	40.8583
1080.91	40.165
1081.87	39.425
1082.83	38.7288
1083.8	38.2008
1084.76	37.9533
1085.73	38.0571
1086.69	38.5349
1087.66	39.3662
1088.62	40.4891
1089.58	41.8019
1090.55	43.1759
1091.51	44.4843
1092.48	45.6368
1093.44	46.5976
1094.4	47.3776
1095.37	48.0083
1096.33	48.5151
1097.3	48.9067
1098.26	49.1797
1099.23	49.3331
1100.19	49.3806
1101.15	49.3513
1102.12	49.2769
1103.08	49.175
1104.05	49.0429
1105.01	48.8664
1105.98	48.6372
1106.94	48.3676
1107.9	48.0909
1108.87	47.8515
1109.83	47.6861
1110.8	47.6063
1111.76	47.5906
1112.73	47.5946
1113.69	47.5781
1114.65	47.5293
1115.62	47.4637
1116.58	47.4006
1117.55	47.338
1118.51	47.2548
1119.47	47.1353
1120.44	46.9905
1121.4	46.8505
1122.37	46.7344
1123.33	46.6267
1124.3	46.4855
1125.26	46.276
1126.22	45.9998
1127.19	45.6914
1128.15	45.3883
1129.12	45.1032
1130.08	44.8215
1131.05	44.5239
1132.01	44.209
1132.97	43.8963
1133.94	43.6084
1134.9	43.3541
1135.87	43.1273
1136.83	42.92
1137.8	42.7345
1138.76	42.5824
1139.72	42.473
1140.69	42.4029
1141.65	42.3569
1142.62	42.3178
1143.58	42.2787
1144.55	42.249
1145.51	42.2517
1146.47	42.3112
1147.44	42.4384
1148.4	42.6205
1149.37	42.8231
1150.33	43.0044
1151.29	43.1346
1152.26	43.2078
1153.22	43.2412
1154.19	43.263
1155.15	43.297
1156.12	43.3531
1157.08	43.4277
1158.04	43.5117
1159.01	43.6016
1159.97	43.704
1160.94	43.8342
1161.9	44.0091
1162.87	44.2385
1163.83	44.5169
1164.79	44.8187
1165.76	45.1031
1166.72	45.3313
1167.69	45.4901
1168.65	45.6043
1169.62	45.7257
1170.58	45.904
1171.54	46.1605
1172.51	46.4833
1173.47	46.8426
1174.44	47.2123
1175.4	47.5791
1176.36	47.9378
1177.33	48.282
1178.29	48.6041
1179.26	48.9028
1180.22	49.1866
1181.19	49.4684
1182.15	49.7564
1183.11	50.0506
1184.08	50.3487
1185.04	50.6511
1186.01	50.9597
1186.97	51.2737
1187.94	51.5895
1188.9	51.9059
1189.86	52.2276
1190.83	52.5611
1191.79	52.908
1192.76	53.262
1193.72	53.6156
1194.69	53.9699
1195.65	54.3381
1196.61	54.7378
1197.58	55.1763
1198.54	55.6391
1199.51	56.0922
1200.47	56.4967
1201.43	56.8267
1202.4	57.0784
1203.36	57.2653
1204.33	57.4057
1205.29	57.5114
1206.26	57.5823
1207.22	57.6092
1208.18	57.5833
1209.15	57.5065
1210.11	57.3947
1211.08	57.271
1212.04	57.1542
1213.01	57.0529
1213.97	56.9694
1214.93	56.9061
1215.9	56.8642
1216.86	56.8378
1217.83	56.8115
1218.79	56.7672
1219.76	56.6934
1220.72	56.589
1221.68	56.4587
1222.65	56.3086
1223.61	56.1457
1224.58	55.9801
1225.54	55.8226
1226.5	55.6784
1227.47	55.542
1228.43	55.4005
1229.4	55.2435
1230.36	55.0747
1231.33	54.9127
1232.29	54.7816
1233.25	54.6974
1234.22	54.6613
1235.18	54.6627
1236.15	54.6867
1237.11	54.72
1238.08	54.7525
1239.04	54.7792
1240	54.802
1240.97	54.8301
1241.93	54.8751
1242.9	54.9429
1243.86	55.0281
1244.83	55.1182
1245.79	55.2054
1246.75	55.2963
1247.72	55.4086
1248.68	55.5572
1249.65	55.7412
1250.61	55.9461
1251.58	56.1602
1252.54	56.3885
1253.5	56.6476
1254.47	56.9461
1255.43	57.2716
1256.4	57.597
1257.36	57.9008
1258.32	58.1793
1259.29	58.4404
1260.25	58.686
1261.22	58.9044
1262.18	59.079
1263.15	59.2037
1264.11	59.2889
1265.07	59.355
1266.04	59.4211
1267	59.4979
1267.97	59.5873
1268.93	59.6825
1269.9	59.7665
1270.86	59.814
1271.82	59.8041
1272.79	59.7367
1273.75	59.6366
1274.72	59.5377
1275.68	59.4605
1276.64	59.4023
1277.61	59.3465
1278.57	59.2828
1279.54	59.2188
1280.5	59.1725
1281.47	59.1532
1282.43	59.1496
1283.39	59.1347
1284.36	59.0842
1285.32	58.9922
1286.29	58.8754
1287.25	58.7621
1288.22	58.6737
1289.18	58.6091
1290.14	58.5427
1291.11	58.4365
1292.07	58.2561
1293.04	57.986
1294	57.636
1294.97	57.2376
1295.93	56.8302
1296.89	56.4443
1297.86	56.0905
1298.82	55.7611
1299.79	55.4389
1300.75	55.1056
1301.72	54.7462
1302.68	54.351
1303.64	53.9172
1304.61	53.4497
1305.57	52.9594
1306.54	52.4574
1307.5	51.9479
1308.46	51.4248
1309.43	50.876
1310.39	50.2952
1311.36	49.6966
1312.32	49.1203
1313.29	48.6187
1314.25	48.2293
1315.21	47.9572
1316.18	47.7804
1317.14	47.6649
1318.11	47.5752
1319.07	47.4818
1320.04	47.3672
1321	47.229
1321.96	47.0759
1322.93	46.9187
1323.89	46.7638
1324.86	46.6101
1325.82	46.4513
1326.79	46.2802
1327.75	46.0929
1328.71	45.889
1329.68	45.6682
1330.64	45.4274
1331.61	45.1595
1332.57	44.8562
1333.53	44.5108
1334.5	44.1175
1335.46	43.6646
1336.43	43.1319
1337.39	42.5019
1338.36	41.7967
1339.32	41.0977
1340.28	40.4885
1341.25	39.9808
1342.21	39.5271
1343.18	39.0787
1344.14	38.6153
1345.11	38.1431
1346.07	37.6788
1347.03	37.2347
1348	36.8164
1348.96	36.4301
1349.93	36.086
1350.89	35.7911
1351.86	35.5393
1352.82	35.313
1353.78	35.0936
1354.75	34.8746
1355.71	34.6646
1356.68	34.4762
1357.64	34.3118
1358.6	34.1565
1359.57	33.9802
1360.53	33.7464
1361.5	33.4369
1362.46	33.0778
1363.43	32.7221
1364.39	32.3948
1365.35	32.0788
1366.32	31.7447
1367.28	31.3798
1368.25	31.0008
1369.21	30.6413
1370.18	30.3222
1371.14	30.0314
1372.1	29.7292
1373.07	29.3713
1374.03	28.9469
1375	28.4993
1375.96	28.0908
1376.93	27.7572
1377.89	27.5053
1378.85	27.3284
1379.82	27.213
1380.78	27.1407
1381.75	27.092
1382.71	27.0514
1383.67	27.0098
1384.64	26.9654
1385.6	26.928
1386.57	26.9171
1387.53	26.945
1388.5	26.9995
1389.46	27.0563
1390.42	27.1003
1391.39	27.1316
1392.35	27.1608
1393.32	27.2031
1394.28	27.2718
1395.25	27.3744
1396.21	27.5139
1397.17	27.6887
1398.14	27.8846
1399.1	28.0742
1400.07	28.2366
1401.03	28.3741
1402	28.5075
1402.96	28.6582
1403.92	28.8299
1404.89	28.9993
1405.85	29.1343
1406.82	29.2227
1407.78	29.2764
1408.74	29.3127
1409.71	29.3409
1410.67	29.3583
1411.64	29.3546
1412.6	29.3194
1413.57	29.2491
1414.53	29.1471
1415.49	29.0215
1416.46	28.8854
1417.42	28.7586
1418.39	28.6607
1419.35	28.5881
1420.32	28.5154
1421.28	28.4213
1422.24	28.2997
1423.21	28.159
1424.17	28.0183
1425.14	27.8936
1426.1	27.7852
1427.07	27.677
1428.03	27.5472
1428.99	27.3826
1429.96	27.1949
1430.92	27.0193
1431.89	26.8897
1432.85	26.8221
1433.82	26.8148
1434.78	26.8438
1435.74	26.8526
1436.71	26.7871
1437.67	26.6591
1438.64	26.5233
1439.6	26.4144
1440.56	26.3385
1441.53	26.2888
1442.49	26.2574
1443.46	26.2409
1444.42	26.2439
1445.39	26.2773
1446.35	26.3509
1447.31	26.4589
1448.28	26.5779
1449.24	26.6843
1450.21	26.7721
1451.17	26.8493
1452.14	26.9285
1453.1	27.0246
1454.06	27.1605
1455.03	27.373
1455.99	27.6759
1456.96	27.9449
1457.92	28.0311
1458.89	28.016
1459.85	28.0134
1460.81	28.0599
1461.78	28.1591
1462.74	28.3035
1463.71	28.4687
1464.67	28.6105
1465.63	28.6965
1466.6	28.735
1467.56	28.7545
1468.53	28.7775
1469.49	28.8212
1470.46	28.9093
1471.42	29.0733
1472.38	29.311
1473.35	29.535
1474.31	29.6589
1475.28	29.6933
1476.24	29.6867
1477.21	29.6744
1478.17	29.6769
1479.13	29.7085
1480.1	29.7764
1481.06	29.8771
1482.03	29.996
1482.99	30.1163
1483.96	30.2283
1484.92	30.3312
1485.88	30.4317
1486.85	30.5461
1487.81	30.7005
1488.78	30.9027
1489.74	31.1064
1490.7	31.2634
1491.67	31.3796
1492.63	31.4883
1493.6	31.6234
1494.56	31.8099
1495.53	32.0425
1496.49	32.2504
1497.45	32.3327
1498.42	32.288
1499.38	32.2172
1500.35	32.2014

## Sheet: interambu-shaft
TITLE	KBr30x30
DATA TYPE	INFRARED SPECTRUM
ORIGIN	JASCO
OWNER
SPECTROMETER/DATA SYSTEM	JASCO Corp., FT/IR-500, Rev. 1.00
RESOLUTION
DELTAX	0.964233
XUNITS	1/CM
YUNITS	TRANSMITTANCE
XYDATA
800.314	85.7999
801.278	85.8671
802.242	86.0933
803.206	86.3686
804.171	86.5331
805.135	86.4982
806.099	86.313
807.063	86.1281
808.028	86.1013
808.992	86.3137
809.956	86.7351
810.92	87.2457
811.885	87.6979
812.849	87.9908
813.813	88.1135
814.777	88.1318
815.741	88.1335
816.706	88.1855
817.67	88.3278
818.634	88.5916
819.598	89.0055
820.563	89.5772
821.527	90.2703
822.491	91.0054
823.455	91.6917
824.42	92.2663
825.384	92.71
826.348	93.0293
827.312	93.2292
828.277	93.305
829.241	93.2542
830.205	93.0951
831.169	92.8701
832.133	92.6327
833.098	92.422
834.062	92.2355
835.026	92.0227
835.99	91.7112
836.955	91.2517
837.919	90.6477
838.883	89.9443
839.847	89.1785
840.812	88.3148
841.776	87.1963
842.74	85.5568
843.704	83.1375
844.668	79.8955
845.633	76.2014
846.597	72.8482
847.561	70.7727
848.525	70.6
849.49	72.3035
850.454	75.2192
851.418	78.3965
852.382	81.0427
853.347	82.7841
854.311	83.6402
855.275	83.8165
856.239	83.5064
857.203	82.8134
858.168	81.7793
859.132	80.434
860.096	78.8243
861.06	77.0274
862.025	75.1635
862.989	73.4016
863.953	71.9343
864.917	70.9213
865.882	70.4304
866.846	70.4188
867.81	70.769
868.774	71.3531
869.739	72.0841
870.703	72.9322
871.667	73.921
872.631	75.1202
873.596	76.6319
874.56	78.5453
875.524	80.868
876.488	83.4758
877.452	86.133
878.417	88.5897
879.381	90.7158
880.345	92.6175
881.309	94.6831
882.274	97.4926
883.238	101.549
884.202	106.905
885.166	112.922
886.13	118.389
887.095	122.021
888.059	123.023
889.023	121.397
889.987	117.854
890.952	113.437
891.916	109.084
892.88	105.366
893.844	102.465
894.809	100.315
895.773	98.76
896.737	97.6308
897.701	96.7703
898.665	96.0439
899.63	95.3549
900.594	94.6578
901.558	93.9607
902.523	93.3116
903.487	92.7703
904.451	92.3643
905.415	92.055
906.379	91.7457
907.344	91.342
908.308	90.825
909.272	90.2655
910.236	89.761
911.201	89.3447
912.165	88.9523
913.129	88.4801
914.093	87.8841
915.058	87.2337
916.022	86.6636
916.986	86.2713
917.95	86.0475
918.914	85.8944
919.879	85.7058
920.843	85.4408
921.807	85.1328
922.771	84.8429
923.736	84.6119
924.7	84.4515
925.664	84.3647
926.628	84.3612
927.592	84.4446
928.557	84.5912
929.521	84.7417
930.485	84.8214
931.449	84.7724
932.414	84.5796
933.378	84.2769
934.342	83.932
935.306	83.623
936.271	83.413
937.235	83.3305
938.199	83.3595
939.163	83.4471
940.128	83.5309
941.092	83.5779
942.056	83.6058
943.02	83.6695
943.985	83.8199
944.949	84.0688
945.913	84.3858
946.877	84.7232
947.841	85.0446
948.806	85.3307
949.77	85.5683
950.734	85.7386
951.698	85.8215
952.663	85.809
953.627	85.7187
954.591	85.589
955.555	85.4597
956.519	85.3514
957.484	85.2617
958.448	85.1807
959.412	85.11
960.376	85.0657
961.341	85.0656
962.305	85.1163
963.269	85.2154
964.233	85.3607
965.198	85.5533
966.162	85.7895
967.126	86.0511
968.09	86.3093
969.055	86.5356
970.019	86.7119
970.983	86.8367
971.947	86.9286
972.912	87.027
973.876	87.18
974.84	87.4204
975.804	87.7426
976.768	88.0978
977.733	88.4154
978.697	88.6364
979.661	88.735
980.625	88.718
981.59	88.6114
982.554	88.4454
983.518	88.2438
984.482	88.0154
985.447	87.7513
986.411	87.4376
987.375	87.0756
988.339	86.6958
989.303	86.3452
990.268	86.0563
991.232	85.8233
992.196	85.6045
993.16	85.3494
994.125	85.0311
995.089	84.662
996.053	84.2868
997.017	83.9593
997.982	83.7168
998.946	83.5652
999.91	83.4825
1000.87	83.4398
1001.84	83.4251
1002.8	83.4542
1003.77	83.557
1004.73	83.752
1005.7	84.0256
1006.66	84.3319
1007.62	84.6128
1008.59	84.8278
1009.55	84.9716
1010.52	85.07
1011.48	85.1605
1012.45	85.2725
1013.41	85.421
1014.37	85.6066
1015.34	85.8145
1016.3	86.0105
1017.27	86.147
1018.23	86.1858
1019.19	86.1273
1020.16	86.019
1021.12	85.9302
1022.09	85.9105
1023.05	85.9632
1024.02	86.0545
1024.98	86.1475
1025.94	86.2333
1026.91	86.3316
1027.87	86.4648
1028.84	86.6314
1029.8	86.8024
1030.77	86.9415
1031.73	87.0324
1032.69	87.0899
1033.66	87.1507
1034.62	87.2484
1035.59	87.3875
1036.55	87.5313
1037.52	87.6165
1038.48	87.5937
1039.44	87.4716
1040.41	87.3283
1041.37	87.2701
1042.34	87.3676
1043.3	87.6149
1044.26	87.9422
1045.23	88.2669
1046.19	88.5387
1047.16	88.747
1048.12	88.9017
1049.09	89.0181
1050.05	89.119
1051.01	89.2371
1051.98	89.4054
1052.94	89.6385
1053.91	89.925
1054.87	90.2361
1055.84	90.5309
1056.8	90.7489
1057.76	90.8027
1058.73	90.5952
1059.69	90.0639
1060.66	89.2186
1061.62	88.1376
1062.59	86.9229
1063.55	85.6484
1064.51	84.3414
1065.48	82.996
1066.44	81.5981
1067.41	80.1346
1068.37	78.588
1069.33	76.9332
1070.3	75.1529
1071.26	73.2608
1072.23	71.3098
1073.19	69.3785
1074.16	67.5456
1075.12	65.8691
1076.08	64.3751
1077.05	63.0508
1078.01	61.8429
1078.98	60.6721
1079.94	59.4711
1080.91	58.2328
1081.87	57.0406
1082.83	56.0548
1083.8	55.4601
1084.76	55.4012
1085.73	55.942
1086.69	57.057
1087.66	58.6509
1088.62	60.5814
1089.58	62.6785
1090.55	64.7625
1091.51	66.6717
1092.48	68.2966
1093.44	69.6004
1094.4	70.6111
1095.37	71.3891
1096.33	71.9904
1097.3	72.4451
1098.26	72.7617
1099.23	72.9458
1100.19	73.0186
1101.15	73.0174
1102.12	72.976
1103.08	72.9016
1104.05	72.7691
1105.01	72.5413
1105.98	72.2038
1106.94	71.7895
1107.9	71.376
1108.87	71.0563
1109.83	70.8987
1110.8	70.9138
1111.76	71.0466
1112.73	71.2022
1113.69	71.2949
1114.65	71.2895
1115.62	71.2052
1116.58	71.0829
1117.55	70.9486
1118.51	70.8034
1119.47	70.6422
1120.44	70.4741
1121.4	70.3204
1122.37	70.1926
1123.33	70.0757
1124.3	69.9354
1125.26	69.7449
1126.22	69.5067
1127.19	69.2485
1128.15	68.9982
1129.12	68.7618
1130.08	68.5226
1131.05	68.2613
1132.01	67.9776
1132.97	67.6916
1133.94	67.4261
1134.9	67.1879
1135.87	66.9647
1136.83	66.7375
1137.8	66.4963
1138.76	66.2456
1139.72	65.9993
1140.69	65.7746
1141.65	65.5885
1142.62	65.4559
1143.58	65.3874
1144.55	65.3881
1145.51	65.4594
1146.47	65.5983
1147.44	65.7933
1148.4	66.0206
1149.37	66.2472
1150.33	66.4441
1151.29	66.5979
1152.26	66.711
1153.22	66.7919
1154.19	66.847
1155.15	66.8814
1156.12	66.9029
1157.08	66.922
1158.04	66.9461
1159.01	66.976
1159.97	67.0108
1160.94	67.0572
1161.9	67.1313
1162.87	67.2498
1163.83	67.4156
1164.79	67.6085
1165.76	67.7909
1166.72	67.9267
1167.69	68.0028
1168.65	68.0393
1169.62	68.0794
1170.58	68.1646
1171.54	68.3133
1172.51	68.5161
1173.47	68.7483
1174.44	68.9866
1175.4	69.2168
1176.36	69.4293
1177.33	69.6125
1178.29	69.7576
1179.26	69.8706
1180.22	69.977
1181.19	70.1106
1182.15	70.2921
1183.11	70.517
1184.08	70.7633
1185.04	71.0084
1186.01	71.2422
1186.97	71.4691
1187.94	71.7026
1188.9	71.9586
1189.86	72.2502
1190.83	72.581
1191.79	72.9381
1192.76	73.2919
1193.72	73.6066
1194.69	73.8606
1195.65	74.0624
1196.61	74.2497
1197.58	74.4644
1198.54	74.72
1199.51	74.9844
1200.47	75.1975
1201.43	75.3122
1202.4	75.328
1203.36	75.2886
1204.33	75.2485
1205.29	75.2362
1206.26	75.2423
1207.22	75.2357
1208.18	75.1921
1209.15	75.1102
1210.11	75.0071
1211.08	74.901
1212.04	74.7987
1213.01	74.7
1213.97	74.6111
1214.93	74.5512
1215.9	74.5422
1216.86	74.5907
1217.83	74.678
1218.79	74.7694
1219.76	74.8357
1220.72	74.871
1221.68	74.894
1222.65	74.9332
1223.61	75.0118
1224.58	75.139
1225.54	75.3148
1226.5	75.5394
1227.47	75.8159
1228.43	76.1426
1229.4	76.5038
1230.36	76.8731
1231.33	77.2279
1232.29	77.5653
1233.25	77.9028
1234.22	78.2611
1235.18	78.6431
1236.15	79.0237
1237.11	79.3579
1238.08	79.6016
1239.04	79.7349
1240	79.7713
1240.97	79.7503
1241.93	79.7167
1242.9	79.7009
1243.86	79.7112
1244.83	79.7411
1245.79	79.7831
1246.75	79.8383
1247.72	79.9135
1248.68	80.0111
1249.65	80.1209
1250.61	80.2236
1251.58	80.3034
1252.54	80.3562
1253.5	80.385
1254.47	80.3864
1255.43	80.3417
1256.4	80.2231
1257.36	80.008
1258.32	79.6906
1259.29	79.2839
1260.25	78.813
1261.22	78.3055
1262.18	77.7843
1263.15	77.2666
1264.11	76.7692
1265.07	76.3126
1266.04	75.9206
1267	75.6146
1267.97	75.4051
1268.93	75.2835
1269.9	75.217
1270.86	75.1534
1271.82	75.0399
1272.79	74.8467
1273.75	74.5769
1274.72	74.2543
1275.68	73.9012
1276.64	73.5259
1277.61	73.1255
1278.57	72.6985
1279.54	72.2512
1280.5	71.7942
1281.47	71.3311
1282.43	70.8521
1283.39	70.337
1284.36	69.7678
1285.32	69.1411
1286.29	68.4742
1287.25	67.7985
1288.22	67.1432
1289.18	66.5196
1290.14	65.9211
1291.11	65.3338
1292.07	64.7522
1293.04	64.1862
1294	63.6613
1294.97	63.2101
1295.93	62.8572
1296.89	62.6033
1297.86	62.4194
1298.82	62.2585
1299.79	62.077
1300.75	61.8514
1301.72	61.5787
1302.68	61.2652
1303.64	60.9156
1304.61	60.5323
1305.57	60.121
1306.54	59.6942
1307.5	59.2647
1308.46	58.8342
1309.43	58.3902
1310.39	57.9183
1311.36	57.4234
1312.32	56.9407
1313.29	56.5224
1314.25	56.2055
1315.21	55.9915
1316.18	55.8537
1317.14	55.7556
1318.11	55.6628
1319.07	55.5458
1320.04	55.3808
1321	55.1536
1321.96	54.861
1322.93	54.508
1323.89	54.1038
1324.86	53.6583
1325.82	53.1809
1326.79	52.6809
1327.75	52.1684
1328.71	51.6555
1329.68	51.155
1330.64	50.6778
1331.61	50.2301
1332.57	49.8122
1333.53	49.4201
1334.5	49.0484
1335.46	48.698
1336.43	48.3877
1337.39	48.1687
1338.36	48.1106
1339.32	48.2367
1340.28	48.4734
1341.25	48.7076
1342.21	48.8726
1343.18	48.9601
1344.14	48.9895
1345.11	48.9798
1346.07	48.9352
1347.03	48.8454
1348	48.7012
1348.96	48.5088
1349.93	48.2897
1350.89	48.0642
1351.86	47.8369
1352.82	47.5976
1353.78	47.3326
1354.75	47.036
1355.71	46.7093
1356.68	46.3554
1357.64	45.9715
1358.6	45.548
1359.57	45.0725
1360.53	44.5412
1361.5	43.9804
1362.46	43.4517
1363.43	43.0033
1364.39	42.626
1365.35	42.2769
1366.32	41.9216
1367.28	41.5554
1368.25	41.2029
1369.21	40.8962
1370.18	40.6492
1371.14	40.4497
1372.1	40.2705
1373.07	40.0817
1374.03	39.8599
1375	39.6006
1375.96	39.3178
1376.93	39.0346
1377.89	38.7774
1378.85	38.5728
1379.82	38.4397
1380.78	38.3762
1381.75	38.3603
1382.71	38.3659
1383.67	38.3863
1384.64	38.4496
1385.6	38.6166
1386.57	38.9369
1387.53	39.377
1388.5	39.8255
1389.46	40.1948
1390.42	40.4757
1391.39	40.7144
1392.35	40.9803
1393.32	41.3393
1394.28	41.8217
1395.25	42.4088
1396.21	43.0729
1397.17	43.8053
1398.14	44.5704
1399.1	45.2765
1400.07	45.8459
1401.03	46.2942
1402	46.7295
1402.96	47.2911
1403.92	48.0586
1404.89	48.9694
1405.85	49.854
1406.82	50.594
1407.78	51.2014
1408.74	51.7546
1409.71	52.3085
1410.67	52.8492
1411.64	53.3079
1412.6	53.6169
1413.57	53.7559
1414.53	53.7599
1415.49	53.7088
1416.46	53.7202
1417.42	53.9048
1418.39	54.2359
1419.35	54.5142
1420.32	54.5988
1421.28	54.521
1422.24	54.3709
1423.21	54.208
1424.17	54.0459
1425.14	53.873
1426.1	53.683
1427.07	53.4856
1428.03	53.2965
1428.99	53.1164
1429.96	52.9218
1430.92	52.6876
1431.89	52.4215
1432.85	52.1681
1433.82	51.9955
1434.78	51.9711
1435.74	52.0944
1436.71	52.2358
1437.67	52.2542
1438.64	52.1461
1439.6	51.9888
1440.56	51.8458
1441.53	51.7429
1442.49	51.6799
1443.46	51.653
1444.42	51.6779
1445.39	51.7949
1446.35	52.0388
1447.31	52.3846
1448.28	52.734
1449.24	52.989
1450.21	53.121
1451.17	53.1541
1452.14	53.1213
1453.1	53.0525
1454.06	53.0063
1455.03	53.1515
1455.99	53.8072
1456.96	54.9556
1457.92	55.8056
1458.89	56.0375
1459.85	55.9619
1460.81	55.8337
1461.78	55.7759
1462.74	55.8529
1463.71	56.0695
1464.67	56.327
1465.63	56.4754
1466.6	56.4595
1467.56	56.3349
1468.53	56.1846
1469.49	56.0897
1470.46	56.1502
1471.42	56.4847
1472.38	57.0841
1473.35	57.6346
1474.31	57.8307
1475.28	57.7158
1476.24	57.4646
1477.21	57.1983
1478.17	56.9819
1479.13	56.851
1480.1	56.8128
1481.06	56.8382
1482.03	56.8715
1482.99	56.8641
1483.96	56.8019
1484.92	56.7049
1485.88	56.6216
1486.85	56.6377
1487.81	56.8679
1488.78	57.3239
1489.74	57.7768
1490.7	58.0097
1491.67	58.034
1492.63	57.9569
1493.6	57.8778
1494.56	57.8856
1495.53	58.0499
1496.49	58.3468
1497.45	58.6018
1498.42	58.6602
1499.38	58.5557
1500.35	58.401
