# Supplementary material for: Mechanical and chemical element structures of sea urchin spines: specialization in ambulacral and interambulacral areas
Source: PeerJ journal article supplement (doi:10.7717/peerj-matsci.38), 2025-07-30
Supplement: ICPAES.xlsx [file ICPAES.xlsx]

## Sheet: concentration01
concentration (ppm)
Element Name		Ca	Mg
Standard Sample1	0.01	0.01	0.01
Standard Sample2	0	0	0
Standard Sample3	0.025	0.025	0.025
Standard Sample4	0.05	0.05	0.05
Standard Sample5	0.1	0.1	0.1
Standard Sample6	0.25	0.25	0.25
Standard Sample7	0.5	0.5	0.5
Standard Sample8	1	1	1
Standard Sample9	2.5	2.5	2.5
Standard Sample10	5	5	5
Unknown sample	ambu-basex2000	0.404812	0.0183208
Unknown sample	ambu-shaftx2000	0.536181	0.0177891
Unknown sample	interambu-basex2000	0.32296	0.0142826
Unknown sample	interambu-shaftx2000	0.440105	0.0179081
Unknown sample	ambu-basex100	6.83667	0.263908
Unknown sample	ambu-shaftx100	9.60125	0.268551
Unknown sample	interambu-basex100	6.47269	0.248711
Unknown sample	interambu-shaftx100	7.53312	0.209698

## Sheet: standard curve01
Standard curve
Element Name	Ca
0order coefficient	67201.4
1order coefficient	2.29277e+06
2order coefficient	0
3order coefficient	0
Correlation coefficient	0.999835
Sample attributes	Sample name	concentration (ppm)	intensity
Standard Sample1	Std00	0.01	97062.6
Standard Sample2	Std01	0	3877.6
Standard Sample3	Std02	0.025	74721.8
Standard Sample4	Std03	0.05	129098
Standard Sample5	Std04	0.1	250204
Standard Sample6	Std05	0.25	707052
Standard Sample7	Std06	0.5	1.25999e+06
Standard Sample8	Std07	1	2.40648e+06
Standard Sample9	Std08	2.5	5.9216e+06
Standard Sample10	Std09	5	1.14543e+07
Element Name	Mg
0order coefficient	147193
1order coefficient	4.79902e+07
2order coefficient	0
3order coefficient	0
Correlation coefficient	0.999985
Sample attributes	Sample name	concentration (ppm)	intensity
Standard Sample1	Std00	0.01	743257
Standard Sample2	Std01	0	92043.4
Standard Sample3	Std02	0.025	1.29925e+06
Standard Sample4	Std03	0.05	2450498
Standard Sample5	Std04	0.1	4.80017e+06
Standard Sample6	Std05	0.25	1.21531e+07
Standard Sample7	Std06	0.5	2.37901e+07
Standard Sample8	Std07	1	4.81174e+07
Standard Sample9	Std08	2.5	1.21223e+08
Standard Sample10	Std09	5	2.39591e+08

## Sheet: concentration02
concentration (ppm)
Element Name		Ca	Mg
Standard Sample1	0.01	0.01	0.01
Standard Sample2	0	0	0
Standard Sample3	0.025	0.025	0.025
Standard Sample4	0.05	0.05	0.05
Standard Sample5	0.1	0.1	0.1
Standard Sample6	0.25	0.25	0.25
Standard Sample7	0.5	0.5	0.5
Standard Sample8	1	1	1
Standard Sample9	2.5	2.5	2.5
Standard Sample10	5	5	5
Unknown sample	ambu-basex2000	0.39298	0.0134028
Unknown sample	ambu-shaftx2000	0.529394	0.0129462
Unknown sample	interambu-basex2000	0.318955	0.00941531
Unknown sample	interambu-shaftx2000	0.440039	0.0131636
Unknown sample	ambu-basex100	6.79638	0.258461
Unknown sample	ambu-shaftx100	9.56275	0.263675
Unknown sample	interambu-basex100	6.38019	0.243214
Unknown sample	interambu-shaftx100	7.55814	0.203995

## Sheet: standard curve02
Standard curve
Element Name	Ca
0order coefficient	75539.3
1order coefficient	2.28605e+06
2order coefficient	0
3order coefficient	0
Correlation coefficient	0.999789
Sample attributes	Sample name	concentration (ppm)	intensity
Standard Sample1	Std00	0.01	108458
Standard Sample2	Std01	0	11596
Standard Sample3	Std02	0.025	82192.6
Standard Sample4	Std03	0.05	134568
Standard Sample5	Std04	0.1	254873
Standard Sample6	Std05	0.25	713300
Standard Sample7	Std06	0.5	1.26653e+06
Standard Sample8	Std07	1	2390554
Standard Sample9	Std08	2.5	5.94644e+06
Standard Sample10	Std09	5	1.14158e+07
Element Name	Mg
0order coefficient	374216
1order coefficient	4.79345e+07
2order coefficient	0
3order coefficient	0
Correlation coefficient	0.999969
Sample attributes	Sample name	concentration (ppm)	intensity
Standard Sample1	Std00	0.01	781151
Standard Sample2	Std01	0	100112
Standard Sample3	Std02	0.025	1.35408e+06
Standard Sample4	Std03	0.05	2.53658e+06
Standard Sample5	Std04	0.1	4.98712e+06
Standard Sample6	Std05	0.25	1.25019e+07
Standard Sample7	Std06	0.5	2.44834e+07
Standard Sample8	Std07	1	4.82158e+07
Standard Sample9	Std08	2.5	121775559
Standard Sample10	Std09	5	2.39269e+08

## Sheet: concentration03
concentration (ppm)
Element Name		Ca	Mg
Standard Sample1	0.01	0.01	0.01
Standard Sample2	0	0	0
Standard Sample3	0.025	0.025	0.025
Standard Sample4	0.05	0.05	0.05
Standard Sample5	0.1	0.1	0.1
Standard Sample6	0.25	0.25	0.25
Standard Sample7	0.5	0.5	0.5
Standard Sample8	1	1	1
Standard Sample9	2.5	2.5	2.5
Standard Sample10	5	5	5
Unknown sample	HB2000	0.393967	0.0106404
Unknown sample	HS2000	0.526271	0.0101126
Unknown sample	KB2000	0.316216	0.00669945
Unknown sample	KS2000	0.437241	0.010568
Unknown sample	HB100	6.80768	0.256054
Unknown sample	HS100	9.59404	0.262171
Unknown sample	KB100	6.41922	0.24222
Unknown sample	KS100	7.54038	0.201625

## Sheet: standard curve03
Standard curve
Element Name	Ca
0order coefficient	73905.2
1order coefficient	2.28879e+06
2order coefficient	0
3order coefficient	0
Correlation coefficient	0.999816
Sample attributes	Sample name	concentration (ppm)	intensity
Standard Sample1	Std00	0.01	106266
Standard Sample2	Std01	0	10280.6
Standard Sample3	Std02	0.025	83011.4
Standard Sample4	Std03	0.05	133300
Standard Sample5	Std04	0.1	253742
Standard Sample6	Std05	0.25	710383
Standard Sample7	Std06	0.5	1260063
Standard Sample8	Std07	1	2.40967e+06
Standard Sample9	Std08	2.5	5.93259e+06
Standard Sample10	Std09	5	1.14344e+07
Element Name	Mg
0order coefficient	498871
1order coefficient	4.8034e+07
2order coefficient	0
3order coefficient	0
Correlation coefficient	0.999889
Sample attributes	Sample name	concentration (ppm)	intensity
Standard Sample1	Std00	0.01	777650
Standard Sample2	Std01	0	99072.6
Standard Sample3	Std02	0.025	1.34858e+06
Standard Sample4	Std03	0.05	2534108
Standard Sample5	Std04	0.1	4.97384e+06
Standard Sample6	Std05	0.25	1.251e+07
Standard Sample7	Std06	0.5	24485884
Standard Sample8	Std07	1	4.8717e+07
Standard Sample9	Std08	2.5	1.23608e+08
Standard Sample10	Std09	5	239135069
