# Supplementary material for: Mechanical and chemical element structures of sea urchin spines: specialization in ambulacral and interambulacral areas
Source: PeerJ journal article supplement (doi:10.7717/peerj-matsci.38), 2025-07-30
Supplement: XRDambu.xlsx [file XRDambu.xlsx]

## Sheet: ambu-base01
2θ	intensity
27	3.33333
27.01	10
27.02	0
27.03	0
27.04	3.33333
27.05	0
27.06	13.3333
27.07	10
27.08	10
27.09	3.33333
27.1	6.66667
27.11	13.3333
27.12	13.3333
27.13	13.3333
27.14	20
27.15	6.66667
27.16	3.33333
27.17	6.66667
27.18	13.3333
27.19	3.33333
27.2	10
27.21	0
27.22	6.66667
27.23	6.66667
27.24	13.3333
27.25	3.33333
27.26	10
27.27	6.66667
27.28	10
27.29	6.66667
27.3	13.3333
27.31	10
27.32	6.66667
27.33	3.33333
27.34	3.33333
27.35	10
27.36	3.33333
27.37	0
27.38	13.3333
27.39	6.66667
27.4	10
27.41	10
27.42	0
27.43	20
27.44	16.6667
27.45	10
27.46	13.3333
27.47	6.66667
27.48	26.6667
27.49	13.3333
27.5	16.6667
27.51	6.66667
27.52	23.3333
27.53	6.66667
27.54	6.66667
27.55	6.66667
27.56	3.33333
27.57	6.66667
27.58	6.66667
27.59	6.66667
27.6	13.3333
27.61	10
27.62	13.3333
27.63	10
27.64	6.66667
27.65	6.66667
27.66	3.33333
27.67	13.3333
27.68	16.6667
27.69	16.6667
27.7	13.3333
27.71	10
27.72	10
27.73	23.3333
27.74	13.3333
27.75	16.6667
27.76	10
27.77	10
27.78	23.3333
27.79	0
27.8	0
27.81	3.33333
27.82	3.33333
27.83	16.6667
27.84	6.66667
27.85	13.3333
27.86	13.3333
27.87	20
27.88	23.3333
27.89	20
27.9	10
27.91	13.3333
27.92	20
27.93	0
27.94	30
27.95	20
27.96	16.6667
27.97	40
27.98	36.6667
27.99	30
28	33.3333
28.01	13.3333
28.02	43.3333
28.03	20
28.04	36.6667
28.05	23.3333
28.06	23.3333
28.07	46.6667
28.08	60
28.09	86.6667
28.1	60
28.11	53.3333
28.12	80
28.13	53.3333
28.14	53.3333
28.15	80
28.16	83.3333
28.17	113.333
28.18	120
28.19	130
28.2	96.6667
28.21	116.667
28.22	200
28.23	156.667
28.24	160
28.25	176.667
28.26	213.333
28.27	230
28.28	270
28.29	240
28.3	276.667
28.31	356.667
28.32	346.667
28.33	446.667
28.34	423.333
28.35	510
28.36	433.333
28.37	423.333
28.38	533.333
28.39	473.333
28.4	583.333
28.41	513.333
28.42	436.667
28.43	410
28.44	330
28.45	346.667
28.46	313.333
28.47	270
28.48	183.333
28.49	186.667
28.5	160
28.51	146.667
28.52	93.3333
28.53	73.3333
28.54	60
28.55	90
28.56	36.6667
28.57	36.6667
28.58	33.3333
28.59	20
28.6	13.3333
28.61	33.3333
28.62	23.3333
28.63	13.3333
28.64	6.66667
28.65	16.6667
28.66	20
28.67	16.6667
28.68	20
28.69	16.6667
28.7	6.66667
28.71	23.3333
28.72	3.33333
28.73	13.3333
28.74	3.33333
28.75	20
28.76	30
28.77	6.66667
28.78	20
28.79	6.66667
28.8	10
28.81	16.6667
28.82	13.3333
28.83	10
28.84	26.6667
28.85	20
28.86	23.3333
28.87	16.6667
28.88	10
28.89	20
28.9	23.3333
28.91	20
28.92	3.33333
28.93	20
28.94	16.6667
28.95	10
28.96	30
28.97	16.6667
28.98	16.6667
28.99	20
29	26.6667
29.01	20
29.02	30
29.03	23.3333
29.04	13.3333
29.05	20
29.06	36.6667
29.07	13.3333
29.08	46.6667
29.09	20
29.1	26.6667
29.11	53.3333
29.12	43.3333
29.13	46.6667
29.14	53.3333
29.15	53.3333
29.16	66.6667
29.17	103.333
29.18	120
29.19	126.667
29.2	186.667
29.21	226.667
29.22	170
29.23	190
29.24	136.667
29.25	126.667
29.26	133.333
29.27	173.333
29.28	146.667
29.29	180
29.3	183.333
29.31	190
29.32	133.333
29.33	180
29.34	200
29.35	213.333
29.36	260
29.37	256.667
29.38	280
29.39	290
29.4	386.667
29.41	400
29.42	370
29.43	463.333
29.44	556.667
29.45	496.667
29.46	540
29.47	700
29.48	736.667
29.49	710
29.5	666.667
29.51	673.333
29.52	616.667
29.53	610
29.54	580
29.55	476.667
29.56	410
29.57	416.667
29.58	340
29.59	273.333
29.6	246.667
29.61	226.667
29.62	246.667
29.63	150
29.64	170
29.65	96.6667
29.66	80
29.67	86.6667
29.68	70
29.69	40
29.7	53.3333
29.71	36.6667
29.72	30
29.73	43.3333
29.74	23.3333
29.75	26.6667
29.76	30
29.77	30
29.78	23.3333
29.79	10
29.8	16.6667
29.81	16.6667
29.82	23.3333
29.83	6.66667
29.84	3.33333
29.85	20
29.86	10
29.87	20
29.88	3.33333
29.89	20
29.9	16.6667
29.91	23.3333
29.92	26.6667
29.93	10
29.94	16.6667
29.95	20
29.96	23.3333
29.97	16.6667
29.98	10
29.99	6.66667
30	10
30.01	10
30.02	10
30.03	10
30.04	6.66667
30.05	13.3333
30.06	16.6667
30.07	6.66667
30.08	26.6667
30.09	6.66667
30.1	6.66667
30.11	0
30.12	16.6667
30.13	3.33333
30.14	10
30.15	3.33333
30.16	13.3333
30.17	6.66667
30.18	3.33333
30.19	6.66667
30.2	16.6667
30.21	16.6667
30.22	13.3333
30.23	6.66667
30.24	0
30.25	10
30.26	13.3333
30.27	3.33333
30.28	6.66667
30.29	13.3333
30.3	13.3333
30.31	6.66667
30.32	6.66667
30.33	6.66667
30.34	13.3333
30.35	0
30.36	3.33333
30.37	3.33333
30.38	23.3333
30.39	6.66667
30.4	16.6667
30.41	0
30.42	16.6667
30.43	26.6667
30.44	10
30.45	10
30.46	6.66667
30.47	10
30.48	6.66667
30.49	6.66667
30.5	6.66667
30.51	16.6667
30.52	16.6667
30.53	13.3333
30.54	10
30.55	10
30.56	3.33333
30.57	10
30.58	16.6667
30.59	3.33333
30.6	6.66667
30.61	10
30.62	10
30.63	10
30.64	6.66667
30.65	10
30.66	16.6667
30.67	3.33333
30.68	6.66667
30.69	3.33333
30.7	6.66667
30.71	6.66667
30.72	16.6667
30.73	13.3333
30.74	3.33333
30.75	3.33333
30.76	6.66667
30.77	6.66667
30.78	3.33333
30.79	6.66667
30.8	3.33333
30.81	13.3333
30.82	6.66667
30.83	13.3333
30.84	6.66667
30.85	6.66667
30.86	20
30.87	3.33333
30.88	3.33333
30.89	10
30.9	16.6667
30.91	13.3333
30.92	13.3333
30.93	13.3333
30.94	10
30.95	13.3333
30.96	6.66667
30.97	10
30.98	3.33333
30.99	10
31	20
31.01	13.3333
31.02	3.33333
31.03	0
31.04	23.3333
31.05	3.33333
31.06	0
31.07	16.6667
31.08	3.33333
31.09	13.3333
31.1	10
31.11	13.3333
31.12	3.33333
31.13	6.66667
31.14	13.3333
31.15	10
31.16	0
31.17	10
31.18	10
31.19	26.6667
31.2	10
31.21	3.33333
31.22	16.6667
31.23	13.3333
31.24	10
31.25	10
31.26	6.66667
31.27	16.6667
31.28	16.6667
31.29	20
31.3	6.66667
31.31	6.66667
31.32	13.3333
31.33	10
31.34	20
31.35	6.66667
31.36	13.3333
31.37	16.6667
31.38	13.3333
31.39	16.6667
31.4	10
31.41	6.66667
31.42	23.3333
31.43	20
31.44	10
31.45	10
31.46	6.66667
31.47	16.6667
31.48	10
31.49	16.6667
31.5	20
31.51	26.6667
31.52	20
31.53	43.3333
31.54	26.6667
31.55	33.3333
31.56	23.3333
31.57	36.6667
31.58	30
31.59	16.6667
31.6	23.3333
31.61	13.3333
31.62	30
31.63	16.6667
31.64	36.6667
31.65	10
31.66	23.3333
31.67	6.66667
31.68	10
31.69	10
31.7	20
31.71	6.66667
31.72	10
31.73	6.66667
31.74	10
31.75	6.66667
31.76	13.3333
31.77	6.66667
31.78	6.66667
31.79	6.66667
31.8	13.3333
31.81	0
31.82	3.33333
31.83	10
31.84	10
31.85	0
31.86	6.66667
31.87	10
31.88	16.6667
31.89	16.6667
31.9	10
31.91	10
31.92	10
31.93	10
31.94	16.6667
31.95	13.3333
31.96	6.66667
31.97	0
31.98	6.66667
31.99	6.66667
32	3.33333
32.01	10
32.02	6.66667
32.03	16.6667
32.04	0
32.05	3.33333
32.06	20
32.07	6.66667
32.08	10
32.09	6.66667
32.1	6.66667
32.11	3.33333
32.12	10
32.13	6.66667
32.14	3.33333
32.15	13.3333
32.16	6.66667
32.17	10
32.18	13.3333
32.19	6.66667
32.2	10
32.21	6.66667
32.22	0
32.23	13.3333
32.24	6.66667
32.25	6.66667
32.26	3.33333
32.27	6.66667
32.28	10
32.29	3.33333
32.3	10
32.31	0
32.32	10
32.33	3.33333
32.34	16.6667
32.35	3.33333
32.36	0
32.37	6.66667
32.38	6.66667
32.39	10
32.4	10
32.41	10
32.42	0
32.43	6.66667
32.44	13.3333
32.45	3.33333
32.46	10
32.47	3.33333
32.48	13.3333
32.49	6.66667
32.5	3.33333
32.51	10
32.52	10
32.53	0
32.54	10
32.55	6.66667
32.56	0
32.57	6.66667
32.58	3.33333
32.59	3.33333
32.6	13.3333
32.61	0
32.62	26.6667
32.63	13.3333
32.64	3.33333
32.65	13.3333
32.66	13.3333
32.67	16.6667
32.68	3.33333
32.69	6.66667
32.7	6.66667
32.71	0
32.72	23.3333
32.73	6.66667
32.74	6.66667
32.75	13.3333
32.76	6.66667
32.77	13.3333
32.78	3.33333
32.79	10
32.8	3.33333
32.81	20
32.82	6.66667
32.83	10
32.84	6.66667
32.85	6.66667
32.86	10
32.87	10
32.88	13.3333
32.89	6.66667
32.9	3.33333
32.91	16.6667
32.92	6.66667
32.93	3.33333
32.94	6.66667
32.95	0
32.96	6.66667
32.97	13.3333
32.98	10
32.99	0
33	3.33333

## Sheet: ambu-base02
2θ	intensity
27	0
27.01	6.66667
27.02	6.66667
27.03	3.33333
27.04	3.33333
27.05	20
27.06	3.33333
27.07	3.33333
27.08	3.33333
27.09	6.66667
27.1	13.3333
27.11	10
27.12	3.33333
27.13	13.3333
27.14	6.66667
27.15	16.6667
27.16	13.3333
27.17	16.6667
27.18	3.33333
27.19	13.3333
27.2	16.6667
27.21	10
27.22	16.6667
27.23	6.66667
27.24	6.66667
27.25	3.33333
27.26	3.33333
27.27	6.66667
27.28	13.3333
27.29	6.66667
27.3	6.66667
27.31	10
27.32	10
27.33	10
27.34	6.66667
27.35	3.33333
27.36	10
27.37	6.66667
27.38	10
27.39	6.66667
27.4	6.66667
27.41	3.33333
27.42	3.33333
27.43	10
27.44	23.3333
27.45	6.66667
27.46	10
27.47	6.66667
27.48	6.66667
27.49	0
27.5	10
27.51	10
27.52	3.33333
27.53	3.33333
27.54	13.3333
27.55	0
27.56	16.6667
27.57	10
27.58	13.3333
27.59	6.66667
27.6	6.66667
27.61	13.3333
27.62	23.3333
27.63	13.3333
27.64	10
27.65	16.6667
27.66	10
27.67	6.66667
27.68	16.6667
27.69	10
27.7	3.33333
27.71	6.66667
27.72	3.33333
27.73	0
27.74	16.6667
27.75	13.3333
27.76	10
27.77	16.6667
27.78	10
27.79	3.33333
27.8	6.66667
27.81	10
27.82	20
27.83	3.33333
27.84	16.6667
27.85	6.66667
27.86	10
27.87	3.33333
27.88	13.3333
27.89	13.3333
27.9	6.66667
27.91	10
27.92	3.33333
27.93	10
27.94	10
27.95	10
27.96	10
27.97	10
27.98	6.66667
27.99	3.33333
28	26.6667
28.01	20
28.02	20
28.03	3.33333
28.04	20
28.05	36.6667
28.06	46.6667
28.07	30
28.08	33.3333
28.09	23.3333
28.1	36.6667
28.11	36.6667
28.12	46.6667
28.13	60
28.14	36.6667
28.15	43.3333
28.16	33.3333
28.17	76.6667
28.18	50
28.19	86.6667
28.2	46.6667
28.21	63.3333
28.22	66.6667
28.23	73.3333
28.24	136.667
28.25	103.333
28.26	90
28.27	66.6667
28.28	110
28.29	130
28.3	150
28.31	176.667
28.32	253.333
28.33	203.333
28.34	263.333
28.35	263.333
28.36	326.667
28.37	333.333
28.38	386.667
28.39	463.333
28.4	533.333
28.41	486.667
28.42	486.667
28.43	516.667
28.44	466.667
28.45	533.333
28.46	530
28.47	463.333
28.48	490
28.49	350
28.5	336.667
28.51	366.667
28.52	293.333
28.53	316.667
28.54	233.333
28.55	196.667
28.56	206.667
28.57	153.333
28.58	160
28.59	136.667
28.6	70
28.61	76.6667
28.62	40
28.63	36.6667
28.64	40
28.65	30
28.66	23.3333
28.67	26.6667
28.68	13.3333
28.69	33.3333
28.7	23.3333
28.71	26.6667
28.72	3.33333
28.73	23.3333
28.74	6.66667
28.75	10
28.76	10
28.77	13.3333
28.78	20
28.79	16.6667
28.8	20
28.81	23.3333
28.82	3.33333
28.83	10
28.84	23.3333
28.85	10
28.86	16.6667
28.87	13.3333
28.88	10
28.89	20
28.9	13.3333
28.91	16.6667
28.92	13.3333
28.93	16.6667
28.94	30
28.95	16.6667
28.96	16.6667
28.97	10
28.98	13.3333
28.99	23.3333
29	26.6667
29.01	10
29.02	16.6667
29.03	13.3333
29.04	23.3333
29.05	10
29.06	16.6667
29.07	26.6667
29.08	33.3333
29.09	30
29.1	23.3333
29.11	23.3333
29.12	46.6667
29.13	23.3333
29.14	50
29.15	36.6667
29.16	36.6667
29.17	26.6667
29.18	36.6667
29.19	43.3333
29.2	43.3333
29.21	56.6667
29.22	50
29.23	50
29.24	46.6667
29.25	46.6667
29.26	80
29.27	70
29.28	56.6667
29.29	80
29.3	66.6667
29.31	76.6667
29.32	123.333
29.33	116.667
29.34	116.667
29.35	113.333
29.36	153.333
29.37	140
29.38	123.333
29.39	150
29.4	173.333
29.41	203.333
29.42	243.333
29.43	233.333
29.44	233.333
29.45	313.333
29.46	306.667
29.47	383.333
29.48	486.667
29.49	493.333
29.5	570
29.51	570
29.52	726.667
29.53	830
29.54	990
29.55	1273.33
29.56	1073.33
29.57	943.333
29.58	870
29.59	643.333
29.6	670
29.61	636.667
29.62	633.333
29.63	523.333
29.64	570
29.65	523.333
29.66	266.667
29.67	206.667
29.68	213.333
29.69	160
29.7	113.333
29.71	100
29.72	86.6667
29.73	66.6667
29.74	60
29.75	46.6667
29.76	53.3333
29.77	60
29.78	26.6667
29.79	43.3333
29.8	16.6667
29.81	20
29.82	16.6667
29.83	20
29.84	16.6667
29.85	13.3333
29.86	26.6667
29.87	20
29.88	23.3333
29.89	16.6667
29.9	23.3333
29.91	20
29.92	30
29.93	23.3333
29.94	16.6667
29.95	23.3333
29.96	0
29.97	30
29.98	10
29.99	36.6667
30	20
30.01	13.3333
30.02	0
30.03	26.6667
30.04	16.6667
30.05	10
30.06	13.3333
30.07	3.33333
30.08	16.6667
30.09	10
30.1	6.66667
30.11	10
30.12	10
30.13	20
30.14	10
30.15	13.3333
30.16	10
30.17	6.66667
30.18	26.6667
30.19	3.33333
30.2	13.3333
30.21	10
30.22	10
30.23	6.66667
30.24	13.3333
30.25	16.6667
30.26	3.33333
30.27	20
30.28	3.33333
30.29	6.66667
30.3	13.3333
30.31	10
30.32	13.3333
30.33	10
30.34	0
30.35	23.3333
30.36	13.3333
30.37	10
30.38	0
30.39	13.3333
30.4	10
30.41	26.6667
30.42	3.33333
30.43	6.66667
30.44	13.3333
30.45	6.66667
30.46	0
30.47	0
30.48	13.3333
30.49	16.6667
30.5	3.33333
30.51	6.66667
30.52	3.33333
30.53	13.3333
30.54	20
30.55	3.33333
30.56	23.3333
30.57	13.3333
30.58	16.6667
30.59	3.33333
30.6	13.3333
30.61	16.6667
30.62	13.3333
30.63	23.3333
30.64	16.6667
30.65	13.3333
30.66	3.33333
30.67	20
30.68	10
30.69	10
30.7	6.66667
30.71	6.66667
30.72	3.33333
30.73	6.66667
30.74	0
30.75	16.6667
30.76	16.6667
30.77	3.33333
30.78	23.3333
30.79	0
30.8	10
30.81	3.33333
30.82	0
30.83	10
30.84	16.6667
30.85	3.33333
30.86	6.66667
30.87	13.3333
30.88	10
30.89	13.3333
30.9	6.66667
30.91	13.3333
30.92	6.66667
30.93	16.6667
30.94	16.6667
30.95	6.66667
30.96	0
30.97	0
30.98	3.33333
30.99	10
31	6.66667
31.01	13.3333
31.02	16.6667
31.03	6.66667
31.04	10
31.05	13.3333
31.06	16.6667
31.07	6.66667
31.08	13.3333
31.09	10
31.1	13.3333
31.11	10
31.12	13.3333
31.13	0
31.14	20
31.15	6.66667
31.16	0
31.17	0
31.18	6.66667
31.19	3.33333
31.2	6.66667
31.21	0
31.22	10
31.23	10
31.24	6.66667
31.25	6.66667
31.26	6.66667
31.27	20
31.28	6.66667
31.29	6.66667
31.3	0
31.31	10
31.32	6.66667
31.33	16.6667
31.34	20
31.35	6.66667
31.36	6.66667
31.37	13.3333
31.38	20
31.39	16.6667
31.4	6.66667
31.41	13.3333
31.42	26.6667
31.43	20
31.44	16.6667
31.45	10
31.46	20
31.47	10
31.48	20
31.49	6.66667
31.5	13.3333
31.51	20
31.52	30
31.53	30
31.54	30
31.55	26.6667
31.56	30
31.57	23.3333
31.58	40
31.59	23.3333
31.6	40
31.61	46.6667
31.62	33.3333
31.63	43.3333
31.64	53.3333
31.65	60
31.66	43.3333
31.67	60
31.68	16.6667
31.69	26.6667
31.7	13.3333
31.71	56.6667
31.72	16.6667
31.73	30
31.74	23.3333
31.75	20
31.76	13.3333
31.77	16.6667
31.78	6.66667
31.79	3.33333
31.8	10
31.81	0
31.82	10
31.83	10
31.84	13.3333
31.85	13.3333
31.86	10
31.87	16.6667
31.88	3.33333
31.89	10
31.9	13.3333
31.91	6.66667
31.92	0
31.93	6.66667
31.94	10
31.95	13.3333
31.96	0
31.97	10
31.98	13.3333
31.99	6.66667
32	0
32.01	6.66667
32.02	10
32.03	16.6667
32.04	3.33333
32.05	6.66667
32.06	16.6667
32.07	6.66667
32.08	20
32.09	3.33333
32.1	6.66667
32.11	13.3333
32.12	16.6667
32.13	6.66667
32.14	13.3333
32.15	13.3333
32.16	3.33333
32.17	3.33333
32.18	16.6667
32.19	13.3333
32.2	3.33333
32.21	13.3333
32.22	0
32.23	13.3333
32.24	13.3333
32.25	16.6667
32.26	0
32.27	6.66667
32.28	3.33333
32.29	3.33333
32.3	0
32.31	10
32.32	6.66667
32.33	3.33333
32.34	3.33333
32.35	10
32.36	16.6667
32.37	3.33333
32.38	0
32.39	13.3333
32.4	6.66667
32.41	10
32.42	6.66667
32.43	10
32.44	10
32.45	13.3333
32.46	6.66667
32.47	0
32.48	10
32.49	10
32.5	10
32.51	0
32.52	10
32.53	10
32.54	6.66667
32.55	10
32.56	10
32.57	0
32.58	13.3333
32.59	6.66667
32.6	3.33333
32.61	6.66667
32.62	0
32.63	0
32.64	6.66667
32.65	3.33333
32.66	13.3333
32.67	6.66667
32.68	10
32.69	6.66667
32.7	6.66667
32.71	10
32.72	6.66667
32.73	0
32.74	3.33333
32.75	6.66667
32.76	3.33333
32.77	0
32.78	6.66667
32.79	16.6667
32.8	3.33333
32.81	6.66667
32.82	0
32.83	3.33333
32.84	20
32.85	6.66667
32.86	10
32.87	6.66667
32.88	6.66667
32.89	6.66667
32.9	0
32.91	3.33333
32.92	6.66667
32.93	3.33333
32.94	0
32.95	3.33333
32.96	0
32.97	3.33333
32.98	3.33333
32.99	6.66667
33	6.66667
	3.33333
	6.66667
	0
	0
	6.66667
	3.33333
	3.33333
	3.33333
	10
	3.33333
	6.66667
	0

## Sheet: ambu-base03
2θ	intensity
27	3.33333
27.01	0
27.02	10
27.03	6.66667
27.04	13.3333
27.05	10
27.06	6.66667
27.07	13.3333
27.08	0
27.09	3.33333
27.1	13.3333
27.11	13.3333
27.12	3.33333
27.13	13.3333
27.14	3.33333
27.15	6.66667
27.16	3.33333
27.17	16.6667
27.18	10
27.19	3.33333
27.2	0
27.21	6.66667
27.22	6.66667
27.23	10
27.24	6.66667
27.25	13.3333
27.26	13.3333
27.27	10
27.28	6.66667
27.29	6.66667
27.3	16.6667
27.31	20
27.32	10
27.33	3.33333
27.34	16.6667
27.35	6.66667
27.36	20
27.37	13.3333
27.38	3.33333
27.39	6.66667
27.4	6.66667
27.41	16.6667
27.42	3.33333
27.43	6.66667
27.44	10
27.45	16.6667
27.46	16.6667
27.47	10
27.48	6.66667
27.49	10
27.5	10
27.51	0
27.52	6.66667
27.53	16.6667
27.54	6.66667
27.55	10
27.56	10
27.57	6.66667
27.58	20
27.59	6.66667
27.6	20
27.61	20
27.62	0
27.63	10
27.64	23.3333
27.65	16.6667
27.66	13.3333
27.67	6.66667
27.68	10
27.69	10
27.7	13.3333
27.71	20
27.72	16.6667
27.73	20
27.74	10
27.75	3.33333
27.76	3.33333
27.77	16.6667
27.78	23.3333
27.79	23.3333
27.8	13.3333
27.81	3.33333
27.82	20
27.83	3.33333
27.84	6.66667
27.85	16.6667
27.86	20
27.87	16.6667
27.88	13.3333
27.89	13.3333
27.9	16.6667
27.91	10
27.92	13.3333
27.93	20
27.94	13.3333
27.95	6.66667
27.96	10
27.97	16.6667
27.98	10
27.99	13.3333
28	26.6667
28.01	23.3333
28.02	30
28.03	23.3333
28.04	36.6667
28.05	23.3333
28.06	33.3333
28.07	20
28.08	56.6667
28.09	40
28.1	20
28.11	40
28.12	50
28.13	53.3333
28.14	43.3333
28.15	63.3333
28.16	63.3333
28.17	86.6667
28.18	76.6667
28.19	63.3333
28.2	66.6667
28.21	90
28.22	93.3333
28.23	73.3333
28.24	116.667
28.25	153.333
28.26	166.667
28.27	126.667
28.28	183.333
28.29	213.333
28.3	203.333
28.31	276.667
28.32	243.333
28.33	253.333
28.34	343.333
28.35	323.333
28.36	406.667
28.37	396.667
28.38	496.667
28.39	470
28.4	520
28.41	480
28.42	496.667
28.43	403.333
28.44	490
28.45	416.667
28.46	426.667
28.47	400
28.48	380
28.49	376.667
28.5	296.667
28.51	280
28.52	210
28.53	160
28.54	153.333
28.55	103.333
28.56	163.333
28.57	103.333
28.58	83.3333
28.59	66.6667
28.6	40
28.61	40
28.62	23.3333
28.63	26.6667
28.64	20
28.65	6.66667
28.66	16.6667
28.67	10
28.68	16.6667
28.69	10
28.7	16.6667
28.71	16.6667
28.72	3.33333
28.73	33.3333
28.74	26.6667
28.75	23.3333
28.76	10
28.77	13.3333
28.78	16.6667
28.79	23.3333
28.8	33.3333
28.81	26.6667
28.82	13.3333
28.83	3.33333
28.84	20
28.85	30
28.86	30
28.87	13.3333
28.88	20
28.89	6.66667
28.9	23.3333
28.91	16.6667
28.92	16.6667
28.93	16.6667
28.94	23.3333
28.95	13.3333
28.96	13.3333
28.97	16.6667
28.98	13.3333
28.99	20
29	30
29.01	23.3333
29.02	23.3333
29.03	23.3333
29.04	13.3333
29.05	30
29.06	23.3333
29.07	30
29.08	46.6667
29.09	56.6667
29.1	66.6667
29.11	33.3333
29.12	53.3333
29.13	36.6667
29.14	63.3333
29.15	43.3333
29.16	46.6667
29.17	56.6667
29.18	63.3333
29.19	60
29.2	66.6667
29.21	83.3333
29.22	76.6667
29.23	56.6667
29.24	46.6667
29.25	63.3333
29.26	93.3333
29.27	90
29.28	96.6667
29.29	86.6667
29.3	123.333
29.31	93.3333
29.32	136.667
29.33	116.667
29.34	103.333
29.35	143.333
29.36	186.667
29.37	200
29.38	226.667
29.39	226.667
29.4	236.667
29.41	260
29.42	296.667
29.43	303.333
29.44	390
29.45	480
29.46	476.667
29.47	643.333
29.48	596.667
29.49	590
29.5	630
29.51	603.333
29.52	590
29.53	610
29.54	610
29.55	640
29.56	613.333
29.57	520
29.58	400
29.59	423.333
29.6	366.667
29.61	363.333
29.62	256.667
29.63	320
29.64	216.667
29.65	236.667
29.66	166.667
29.67	170
29.68	96.6667
29.69	80
29.7	53.3333
29.71	60
29.72	63.3333
29.73	56.6667
29.74	43.3333
29.75	30
29.76	33.3333
29.77	16.6667
29.78	26.6667
29.79	13.3333
29.8	26.6667
29.81	10
29.82	13.3333
29.83	13.3333
29.84	36.6667
29.85	16.6667
29.86	26.6667
29.87	10
29.88	26.6667
29.89	13.3333
29.9	3.33333
29.91	10
29.92	10
29.93	26.6667
29.94	16.6667
29.95	16.6667
29.96	6.66667
29.97	3.33333
29.98	16.6667
29.99	6.66667
30	6.66667
30.01	20
30.02	13.3333
30.03	16.6667
30.04	33.3333
30.05	20
30.06	6.66667
30.07	16.6667
30.08	20
30.09	16.6667
30.1	10
30.11	16.6667
30.12	10
30.13	3.33333
30.14	6.66667
30.15	6.66667
30.16	13.3333
30.17	13.3333
30.18	6.66667
30.19	30
30.2	20
30.21	13.3333
30.22	10
30.23	13.3333
30.24	13.3333
30.25	20
30.26	10
30.27	13.3333
30.28	20
30.29	0
30.3	13.3333
30.31	16.6667
30.32	6.66667
30.33	10
30.34	10
30.35	13.3333
30.36	16.6667
30.37	3.33333
30.38	10
30.39	10
30.4	3.33333
30.41	6.66667
30.42	16.6667
30.43	10
30.44	23.3333
30.45	13.3333
30.46	20
30.47	6.66667
30.48	6.66667
30.49	3.33333
30.5	0
30.51	13.3333
30.52	10
30.53	6.66667
30.54	10
30.55	6.66667
30.56	13.3333
30.57	13.3333
30.58	10
30.59	6.66667
30.6	13.3333
30.61	10
30.62	3.33333
30.63	10
30.64	3.33333
30.65	13.3333
30.66	3.33333
30.67	6.66667
30.68	10
30.69	3.33333
30.7	23.3333
30.71	0
30.72	6.66667
30.73	20
30.74	6.66667
30.75	3.33333
30.76	16.6667
30.77	10
30.78	6.66667
30.79	0
30.8	16.6667
30.81	3.33333
30.82	6.66667
30.83	10
30.84	3.33333
30.85	13.3333
30.86	10
30.87	16.6667
30.88	23.3333
30.89	10
30.9	0
30.91	6.66667
30.92	3.33333
30.93	16.6667
30.94	6.66667
30.95	3.33333
30.96	10
30.97	3.33333
30.98	6.66667
30.99	0
31	10
31.01	16.6667
31.02	16.6667
31.03	10
31.04	3.33333
31.05	3.33333
31.06	3.33333
31.07	6.66667
31.08	13.3333
31.09	10
31.1	13.3333
31.11	13.3333
31.12	13.3333
31.13	10
31.14	10
31.15	6.66667
31.16	16.6667
31.17	13.3333
31.18	16.6667
31.19	13.3333
31.2	0
31.21	6.66667
31.22	13.3333
31.23	3.33333
31.24	3.33333
31.25	20
31.26	10
31.27	10
31.28	3.33333
31.29	6.66667
31.3	10
31.31	0
31.32	10
31.33	6.66667
31.34	0
31.35	6.66667
31.36	3.33333
31.37	10
31.38	13.3333
31.39	3.33333
31.4	3.33333
31.41	0
31.42	10
31.43	20
31.44	20
31.45	10
31.46	23.3333
31.47	20
31.48	23.3333
31.49	16.6667
31.5	13.3333
31.51	26.6667
31.52	13.3333
31.53	13.3333
31.54	26.6667
31.55	13.3333
31.56	40
31.57	50
31.58	33.3333
31.59	40
31.6	23.3333
31.61	26.6667
31.62	20
31.63	30
31.64	16.6667
31.65	26.6667
31.66	20
31.67	23.3333
31.68	6.66667
31.69	20
31.7	3.33333
31.71	10
31.72	16.6667
31.73	6.66667
31.74	10
31.75	10
31.76	13.3333
31.77	6.66667
31.78	13.3333
31.79	10
31.8	10
31.81	13.3333
31.82	10
31.83	10
31.84	10
31.85	10
31.86	6.66667
31.87	10
31.88	3.33333
31.89	3.33333
31.9	10
31.91	3.33333
31.92	10
31.93	3.33333
31.94	6.66667
31.95	0
31.96	10
31.97	13.3333
31.98	16.6667
31.99	13.3333
32	6.66667
32.01	3.33333
32.02	6.66667
32.03	6.66667
32.04	6.66667
32.05	16.6667
32.06	3.33333
32.07	0
32.08	6.66667
32.09	10
32.1	6.66667
32.11	6.66667
32.12	10
32.13	13.3333
32.14	13.3333
32.15	3.33333
32.16	3.33333
32.17	0
32.18	10
32.19	6.66667
32.2	3.33333
32.21	3.33333
32.22	3.33333
32.23	3.33333
32.24	13.3333
32.25	6.66667
32.26	6.66667
32.27	0
32.28	3.33333
32.29	0
32.3	6.66667
32.31	16.6667
32.32	10
32.33	3.33333
32.34	0
32.35	6.66667
32.36	10
32.37	3.33333
32.38	6.66667
32.39	0
32.4	0
32.41	3.33333
32.42	6.66667
32.43	6.66667
32.44	10
32.45	6.66667
32.46	10
32.47	0
32.48	0
32.49	6.66667
32.5	3.33333
32.51	6.66667
32.52	6.66667
32.53	6.66667
32.54	10
32.55	6.66667
32.56	3.33333
32.57	0
32.58	6.66667
32.59	3.33333
32.6	3.33333
32.61	6.66667
32.62	6.66667
32.63	16.6667
32.64	6.66667
32.65	6.66667
32.66	10
32.67	10
32.68	10
32.69	6.66667
32.7	6.66667
32.71	10
32.72	10
32.73	3.33333
32.74	3.33333
32.75	13.3333
32.76	3.33333
32.77	10
32.78	10
32.79	13.3333
32.8	6.66667
32.81	6.66667
32.82	6.66667
32.83	10
32.84	10
32.85	6.66667
32.86	10
32.87	13.3333
32.88	6.66667
32.89	6.66667
32.9	3.33333
32.91	3.33333
32.92	16.6667
32.93	3.33333
32.94	6.66667
32.95	6.66667
32.96	16.6667
32.97	6.66667
32.98	6.66667
32.99	13.3333
33	10

## Sheet: ambu-shaft01
2θ	intensity
27	10
27.01	6.66667
27.02	10
27.03	16.6667
27.04	3.33333
27.05	10
27.06	6.66667
27.07	0
27.08	3.33333
27.09	0
27.1	6.66667
27.11	10
27.12	6.66667
27.13	6.66667
27.14	3.33333
27.15	3.33333
27.16	6.66667
27.17	6.66667
27.18	13.3333
27.19	6.66667
27.2	6.66667
27.21	10
27.22	6.66667
27.23	0
27.24	16.6667
27.25	3.33333
27.26	6.66667
27.27	3.33333
27.28	10
27.29	6.66667
27.3	16.6667
27.31	3.33333
27.32	10
27.33	0
27.34	10
27.35	10
27.36	10
27.37	10
27.38	6.66667
27.39	10
27.4	3.33333
27.41	10
27.42	16.6667
27.43	6.66667
27.44	13.3333
27.45	0
27.46	10
27.47	0
27.48	3.33333
27.49	0
27.5	0
27.51	6.66667
27.52	6.66667
27.53	16.6667
27.54	3.33333
27.55	6.66667
27.56	6.66667
27.57	13.3333
27.58	16.6667
27.59	6.66667
27.6	3.33333
27.61	16.6667
27.62	6.66667
27.63	16.6667
27.64	10
27.65	10
27.66	6.66667
27.67	13.3333
27.68	6.66667
27.69	6.66667
27.7	6.66667
27.71	10
27.72	10
27.73	26.6667
27.74	3.33333
27.75	10
27.76	3.33333
27.77	6.66667
27.78	20
27.79	3.33333
27.8	6.66667
27.81	10
27.82	13.3333
27.83	10
27.84	6.66667
27.85	13.3333
27.86	6.66667
27.87	6.66667
27.88	13.3333
27.89	6.66667
27.9	30
27.91	6.66667
27.92	13.3333
27.93	3.33333
27.94	0
27.95	16.6667
27.96	6.66667
27.97	6.66667
27.98	23.3333
27.99	16.6667
28	16.6667
28.01	13.3333
28.02	20
28.03	16.6667
28.04	0
28.05	20
28.06	20
28.07	6.66667
28.08	13.3333
28.09	10
28.1	10
28.11	23.3333
28.12	26.6667
28.13	40
28.14	20
28.15	36.6667
28.16	53.3333
28.17	23.3333
28.18	23.3333
28.19	43.3333
28.2	13.3333
28.21	36.6667
28.22	26.6667
28.23	43.3333
28.24	66.6667
28.25	66.6667
28.26	40
28.27	63.3333
28.28	80
28.29	53.3333
28.3	70
28.31	83.3333
28.32	53.3333
28.33	46.6667
28.34	120
28.35	140
28.36	156.667
28.37	176.667
28.38	160
28.39	256.667
28.4	296.667
28.41	253.333
28.42	230
28.43	240
28.44	250
28.45	140
28.46	180
28.47	206.667
28.48	170
28.49	166.667
28.5	210
28.51	123.333
28.52	133.333
28.53	83.3333
28.54	93.3333
28.55	106.667
28.56	70
28.57	16.6667
28.58	36.6667
28.59	40
28.6	43.3333
28.61	36.6667
28.62	23.3333
28.63	26.6667
28.64	13.3333
28.65	16.6667
28.66	6.66667
28.67	3.33333
28.68	16.6667
28.69	6.66667
28.7	6.66667
28.71	10
28.72	3.33333
28.73	16.6667
28.74	6.66667
28.75	16.6667
28.76	20
28.77	0
28.78	20
28.79	3.33333
28.8	20
28.81	13.3333
28.82	13.3333
28.83	10
28.84	16.6667
28.85	10
28.86	23.3333
28.87	0
28.88	13.3333
28.89	16.6667
28.9	13.3333
28.91	13.3333
28.92	23.3333
28.93	10
28.94	23.3333
28.95	6.66667
28.96	16.6667
28.97	10
28.98	13.3333
28.99	23.3333
29	13.3333
29.01	30
29.02	13.3333
29.03	20
29.04	20
29.05	30
29.06	43.3333
29.07	16.6667
29.08	23.3333
29.09	30
29.1	23.3333
29.11	6.66667
29.12	10
29.13	23.3333
29.14	13.3333
29.15	46.6667
29.16	46.6667
29.17	20
29.18	60
29.19	36.6667
29.2	33.3333
29.21	60
29.22	70
29.23	66.6667
29.24	70
29.25	76.6667
29.26	80
29.27	96.6667
29.28	116.667
29.29	106.667
29.3	153.333
29.31	50
29.32	183.333
29.33	153.333
29.34	173.333
29.35	210
29.36	200
29.37	223.333
29.38	290
29.39	393.333
29.4	236.667
29.41	330
29.42	490
29.43	520
29.44	563.333
29.45	536.667
29.46	576.667
29.47	743.333
29.48	686.667
29.49	776.667
29.5	720
29.51	776.667
29.52	683.333
29.53	653.333
29.54	706.667
29.55	613.333
29.56	540
29.57	180
29.58	520
29.59	470
29.6	426.667
29.61	176.667
29.62	210
29.63	330
29.64	210
29.65	133.333
29.66	143.333
29.67	126.667
29.68	113.333
29.69	100
29.7	46.6667
29.71	53.3333
29.72	36.6667
29.73	10
29.74	30
29.75	23.3333
29.76	46.6667
29.77	20
29.78	30
29.79	16.6667
29.8	23.3333
29.81	13.3333
29.82	26.6667
29.83	13.3333
29.84	3.33333
29.85	23.3333
29.86	26.6667
29.87	36.6667
29.88	16.6667
29.89	16.6667
29.9	16.6667
29.91	23.3333
29.92	16.6667
29.93	26.6667
29.94	13.3333
29.95	13.3333
29.96	3.33333
29.97	3.33333
29.98	16.6667
29.99	0
30	3.33333
30.01	6.66667
30.02	3.33333
30.03	13.3333
30.04	16.6667
30.05	20
30.06	13.3333
30.07	13.3333
30.08	6.66667
30.09	13.3333
30.1	10
30.11	13.3333
30.12	20
30.13	3.33333
30.14	13.3333
30.15	23.3333
30.16	20
30.17	13.3333
30.18	10
30.19	10
30.2	13.3333
30.21	6.66667
30.22	10
30.23	16.6667
30.24	6.66667
30.25	13.3333
30.26	6.66667
30.27	10
30.28	13.3333
30.29	6.66667
30.3	6.66667
30.31	6.66667
30.32	13.3333
30.33	6.66667
30.34	10
30.35	13.3333
30.36	23.3333
30.37	3.33333
30.38	16.6667
30.39	6.66667
30.4	6.66667
30.41	6.66667
30.42	13.3333
30.43	10
30.44	10
30.45	6.66667
30.46	13.3333
30.47	6.66667
30.48	10
30.49	6.66667
30.5	6.66667
30.51	10
30.52	3.33333
30.53	3.33333
30.54	6.66667
30.55	13.3333
30.56	3.33333
30.57	3.33333
30.58	13.3333
30.59	0
30.6	13.3333
30.61	0
30.62	10
30.63	3.33333
30.64	6.66667
30.65	3.33333
30.66	10
30.67	6.66667
30.68	6.66667
30.69	23.3333
30.7	3.33333
30.71	0
30.72	3.33333
30.73	10
30.74	6.66667
30.75	10
30.76	3.33333
30.77	6.66667
30.78	10
30.79	3.33333
30.8	13.3333
30.81	20
30.82	3.33333
30.83	13.3333
30.84	10
30.85	3.33333
30.86	3.33333
30.87	10
30.88	3.33333
30.89	0
30.9	6.66667
30.91	3.33333
30.92	13.3333
30.93	6.66667
30.94	3.33333
30.95	6.66667
30.96	3.33333
30.97	13.3333
30.98	3.33333
30.99	20
31	3.33333
31.01	3.33333
31.02	3.33333
31.03	6.66667
31.04	6.66667
31.05	0
31.06	0
31.07	6.66667
31.08	16.6667
31.09	10
31.1	6.66667
31.11	6.66667
31.12	6.66667
31.13	6.66667
31.14	10
31.15	16.6667
31.16	13.3333
31.17	13.3333
31.18	6.66667
31.19	10
31.2	10
31.21	3.33333
31.22	0
31.23	13.3333
31.24	10
31.25	3.33333
31.26	6.66667
31.27	20
31.28	6.66667
31.29	13.3333
31.3	10
31.31	10
31.32	6.66667
31.33	6.66667
31.34	16.6667
31.35	6.66667
31.36	6.66667
31.37	10
31.38	16.6667
31.39	23.3333
31.4	33.3333
31.41	40
31.42	56.6667
31.43	40
31.44	33.3333
31.45	53.3333
31.46	16.6667
31.47	26.6667
31.48	26.6667
31.49	23.3333
31.5	40
31.51	46.6667
31.52	20
31.53	46.6667
31.54	26.6667
31.55	33.3333
31.56	33.3333
31.57	40
31.58	20
31.59	16.6667
31.6	13.3333
31.61	46.6667
31.62	13.3333
31.63	16.6667
31.64	23.3333
31.65	23.3333
31.66	16.6667
31.67	13.3333
31.68	3.33333
31.69	10
31.7	16.6667
31.71	13.3333
31.72	16.6667
31.73	6.66667
31.74	3.33333
31.75	6.66667
31.76	3.33333
31.77	13.3333
31.78	6.66667
31.79	10
31.8	13.3333
31.81	10
31.82	6.66667
31.83	0
31.84	0
31.85	3.33333
31.86	3.33333
31.87	3.33333
31.88	3.33333
31.89	10
31.9	0
31.91	0
31.92	3.33333
31.93	3.33333
31.94	3.33333
31.95	6.66667
31.96	6.66667
31.97	6.66667
31.98	10
31.99	3.33333
32	6.66667
32.01	3.33333
32.02	3.33333
32.03	3.33333
32.04	3.33333
32.05	6.66667
32.06	6.66667
32.07	6.66667
32.08	6.66667
32.09	6.66667
32.1	10
32.11	3.33333
32.12	10
32.13	6.66667
32.14	10
32.15	6.66667
32.16	6.66667
32.17	3.33333
32.18	13.3333
32.19	0
32.2	3.33333
32.21	3.33333
32.22	6.66667
32.23	3.33333
32.24	6.66667
32.25	0
32.26	0
32.27	10
32.28	3.33333
32.29	3.33333
32.3	0
32.31	3.33333
32.32	3.33333
32.33	3.33333
32.34	0
32.35	6.66667
32.36	13.3333
32.37	13.3333
32.38	3.33333
32.39	16.6667
32.4	6.66667
32.41	0
32.42	0
32.43	13.3333
32.44	10
32.45	0
32.46	0
32.47	10
32.48	6.66667
32.49	10
32.5	0
32.51	3.33333
32.52	6.66667
32.53	13.3333
32.54	10
32.55	0
32.56	13.3333
32.57	3.33333
32.58	3.33333
32.59	0
32.6	0
32.61	0
32.62	23.3333
32.63	10
32.64	6.66667
32.65	6.66667
32.66	3.33333
32.67	3.33333
32.68	6.66667
32.69	6.66667
32.7	0
32.71	6.66667
32.72	3.33333
32.73	6.66667
32.74	0
32.75	3.33333
32.76	6.66667
32.77	6.66667
32.78	6.66667
32.79	3.33333
32.8	0
32.81	3.33333
32.82	3.33333
32.83	0
32.84	6.66667
32.85	6.66667
32.86	10
32.87	10
32.88	3.33333
32.89	3.33333
32.9	6.66667
32.91	10
32.92	10
32.93	3.33333
32.94	6.66667
32.95	3.33333
32.96	6.66667
32.97	3.33333
32.98	13.3333
32.99	10
33	3.33333

## Sheet: ambu-shaft02
2θ	intensity
27	0
27.01	0
27.02	3.33333
27.03	6.66667
27.04	0
27.05	6.66667
27.06	3.33333
27.07	3.33333
27.08	3.33333
27.09	10
27.1	6.66667
27.11	10
27.12	3.33333
27.13	10
27.14	6.66667
27.15	10
27.16	10
27.17	6.66667
27.18	10
27.19	10
27.2	3.33333
27.21	6.66667
27.22	0
27.23	3.33333
27.24	0
27.25	3.33333
27.26	6.66667
27.27	10
27.28	3.33333
27.29	13.3333
27.3	3.33333
27.31	6.66667
27.32	6.66667
27.33	13.3333
27.34	13.3333
27.35	10
27.36	13.3333
27.37	13.3333
27.38	3.33333
27.39	0
27.4	3.33333
27.41	10
27.42	6.66667
27.43	3.33333
27.44	0
27.45	6.66667
27.46	6.66667
27.47	0
27.48	0
27.49	6.66667
27.5	0
27.51	0
27.52	6.66667
27.53	3.33333
27.54	6.66667
27.55	10
27.56	13.3333
27.57	6.66667
27.58	6.66667
27.59	3.33333
27.6	10
27.61	6.66667
27.62	3.33333
27.63	6.66667
27.64	0
27.65	16.6667
27.66	10
27.67	0
27.68	3.33333
27.69	10
27.7	6.66667
27.71	10
27.72	3.33333
27.73	10
27.74	6.66667
27.75	6.66667
27.76	13.3333
27.77	3.33333
27.78	3.33333
27.79	13.3333
27.8	13.3333
27.81	6.66667
27.82	13.3333
27.83	10
27.84	10
27.85	13.3333
27.86	13.3333
27.87	10
27.88	10
27.89	13.3333
27.9	0
27.91	13.3333
27.92	10
27.93	16.6667
27.94	13.3333
27.95	3.33333
27.96	10
27.97	3.33333
27.98	0
27.99	16.6667
28	10
28.01	6.66667
28.02	10
28.03	16.6667
28.04	23.3333
28.05	10
28.06	13.3333
28.07	16.6667
28.08	13.3333
28.09	13.3333
28.1	13.3333
28.11	6.66667
28.12	20
28.13	26.6667
28.14	26.6667
28.15	16.6667
28.16	20
28.17	23.3333
28.18	30
28.19	13.3333
28.2	26.6667
28.21	26.6667
28.22	33.3333
28.23	36.6667
28.24	40
28.25	50
28.26	33.3333
28.27	46.6667
28.28	53.3333
28.29	73.3333
28.3	66.6667
28.31	76.6667
28.32	83.3333
28.33	83.3333
28.34	73.3333
28.35	96.6667
28.36	123.333
28.37	110
28.38	193.333
28.39	196.667
28.4	260
28.41	256.667
28.42	256.667
28.43	230
28.44	196.667
28.45	180
28.46	196.667
28.47	236.667
28.48	226.667
28.49	226.667
28.5	156.667
28.51	140
28.52	200
28.53	106.667
28.54	116.667
28.55	113.333
28.56	106.667
28.57	70
28.58	63.3333
28.59	63.3333
28.6	33.3333
28.61	40
28.62	56.6667
28.63	10
28.64	23.3333
28.65	23.3333
28.66	26.6667
28.67	23.3333
28.68	10
28.69	10
28.7	20
28.71	13.3333
28.72	6.66667
28.73	6.66667
28.74	3.33333
28.75	10
28.76	20
28.77	10
28.78	6.66667
28.79	10
28.8	33.3333
28.81	26.6667
28.82	16.6667
28.83	20
28.84	6.66667
28.85	16.6667
28.86	13.3333
28.87	10
28.88	10
28.89	13.3333
28.9	13.3333
28.91	13.3333
28.92	20
28.93	16.6667
28.94	16.6667
28.95	10
28.96	10
28.97	23.3333
28.98	20
28.99	6.66667
29	6.66667
29.01	16.6667
29.02	26.6667
29.03	33.3333
29.04	33.3333
29.05	26.6667
29.06	30
29.07	20
29.08	26.6667
29.09	20
29.1	16.6667
29.11	46.6667
29.12	36.6667
29.13	23.3333
29.14	36.6667
29.15	43.3333
29.16	50
29.17	46.6667
29.18	56.6667
29.19	46.6667
29.2	80
29.21	70
29.22	46.6667
29.23	80
29.24	90
29.25	103.333
29.26	126.667
29.27	153.333
29.28	180
29.29	146.667
29.3	186.667
29.31	163.333
29.32	170
29.33	113.333
29.34	113.333
29.35	233.333
29.36	193.333
29.37	200
29.38	220
29.39	280
29.4	263.333
29.41	350
29.42	380
29.43	413.333
29.44	440
29.45	463.333
29.46	756.667
29.47	733.333
29.48	926.667
29.49	873.333
29.5	833.333
29.51	793.333
29.52	723.333
29.53	666.667
29.54	610
29.55	600
29.56	660
29.57	640
29.58	560
29.59	533.333
29.6	513.333
29.61	423.333
29.62	410
29.63	280
29.64	293.333
29.65	216.667
29.66	193.333
29.67	160
29.68	150
29.69	100
29.7	113.333
29.71	80
29.72	53.3333
29.73	70
29.74	33.3333
29.75	30
29.76	26.6667
29.77	26.6667
29.78	26.6667
29.79	30
29.8	23.3333
29.81	16.6667
29.82	23.3333
29.83	13.3333
29.84	16.6667
29.85	10
29.86	23.3333
29.87	13.3333
29.88	23.3333
29.89	20
29.9	23.3333
29.91	6.66667
29.92	13.3333
29.93	6.66667
29.94	13.3333
29.95	16.6667
29.96	10
29.97	16.6667
29.98	20
29.99	6.66667
30	20
30.01	13.3333
30.02	10
30.03	16.6667
30.04	10
30.05	6.66667
30.06	16.6667
30.07	13.3333
30.08	10
30.09	6.66667
30.1	6.66667
30.11	10
30.12	3.33333
30.13	20
30.14	13.3333
30.15	3.33333
30.16	13.3333
30.17	16.6667
30.18	6.66667
30.19	3.33333
30.2	10
30.21	13.3333
30.22	3.33333
30.23	13.3333
30.24	3.33333
30.25	6.66667
30.26	10
30.27	30
30.28	10
30.29	13.3333
30.3	10
30.31	10
30.32	16.6667
30.33	16.6667
30.34	6.66667
30.35	13.3333
30.36	6.66667
30.37	13.3333
30.38	10
30.39	6.66667
30.4	13.3333
30.41	6.66667
30.42	13.3333
30.43	10
30.44	10
30.45	3.33333
30.46	6.66667
30.47	6.66667
30.48	10
30.49	16.6667
30.5	16.6667
30.51	13.3333
30.52	10
30.53	16.6667
30.54	10
30.55	16.6667
30.56	10
30.57	6.66667
30.58	3.33333
30.59	16.6667
30.6	6.66667
30.61	10
30.62	16.6667
30.63	3.33333
30.64	3.33333
30.65	6.66667
30.66	3.33333
30.67	6.66667
30.68	6.66667
30.69	13.3333
30.7	16.6667
30.71	0
30.72	3.33333
30.73	10
30.74	13.3333
30.75	10
30.76	10
30.77	10
30.78	3.33333
30.79	6.66667
30.8	6.66667
30.81	3.33333
30.82	6.66667
30.83	6.66667
30.84	10
30.85	3.33333
30.86	10
30.87	3.33333
30.88	6.66667
30.89	3.33333
30.9	3.33333
30.91	3.33333
30.92	10
30.93	0
30.94	10
30.95	13.3333
30.96	3.33333
30.97	3.33333
30.98	16.6667
30.99	10
31	3.33333
31.01	6.66667
31.02	10
31.03	6.66667
31.04	10
31.05	10
31.06	0
31.07	10
31.08	10
31.09	10
31.1	10
31.11	10
31.12	13.3333
31.13	16.6667
31.14	13.3333
31.15	13.3333
31.16	10
31.17	23.3333
31.18	6.66667
31.19	13.3333
31.2	6.66667
31.21	16.6667
31.22	13.3333
31.23	13.3333
31.24	3.33333
31.25	10
31.26	10
31.27	0
31.28	20
31.29	6.66667
31.3	16.6667
31.31	0
31.32	13.3333
31.33	6.66667
31.34	6.66667
31.35	10
31.36	16.6667
31.37	10
31.38	6.66667
31.39	16.6667
31.4	16.6667
31.41	13.3333
31.42	16.6667
31.43	20
31.44	23.3333
31.45	13.3333
31.46	26.6667
31.47	13.3333
31.48	33.3333
31.49	23.3333
31.5	16.6667
31.51	36.6667
31.52	43.3333
31.53	26.6667
31.54	16.6667
31.55	40
31.56	36.6667
31.57	20
31.58	43.3333
31.59	36.6667
31.6	40
31.61	43.3333
31.62	46.6667
31.63	53.3333
31.64	56.6667
31.65	73.3333
31.66	23.3333
31.67	40
31.68	33.3333
31.69	36.6667
31.7	36.6667
31.71	30
31.72	16.6667
31.73	10
31.74	26.6667
31.75	16.6667
31.76	6.66667
31.77	20
31.78	6.66667
31.79	6.66667
31.8	13.3333
31.81	6.66667
31.82	20
31.83	10
31.84	6.66667
31.85	3.33333
31.86	13.3333
31.87	3.33333
31.88	0
31.89	0
31.9	3.33333
31.91	10
31.92	0
31.93	3.33333
31.94	10
31.95	10
31.96	10
31.97	3.33333
31.98	10
31.99	3.33333
32	6.66667
32.01	13.3333
32.02	3.33333
32.03	0
32.04	0
32.05	3.33333
32.06	10
32.07	13.3333
32.08	6.66667
32.09	6.66667
32.1	6.66667
32.11	0
32.12	3.33333
32.13	6.66667
32.14	0
32.15	3.33333
32.16	13.3333
32.17	3.33333
32.18	0
32.19	13.3333
32.2	3.33333
32.21	10
32.22	6.66667
32.23	6.66667
32.24	3.33333
32.25	10
32.26	3.33333
32.27	0
32.28	3.33333
32.29	6.66667
32.3	13.3333
32.31	10
32.32	13.3333
32.33	0
32.34	3.33333
32.35	10
32.36	3.33333
32.37	6.66667
32.38	10
32.39	10
32.4	6.66667
32.41	13.3333
32.42	3.33333
32.43	16.6667
32.44	13.3333
32.45	6.66667
32.46	3.33333
32.47	6.66667
32.48	6.66667
32.49	6.66667
32.5	10
32.51	6.66667
32.52	10
32.53	0
32.54	10
32.55	3.33333
32.56	10
32.57	6.66667
32.58	10
32.59	6.66667
32.6	10
32.61	0
32.62	3.33333
32.63	16.6667
32.64	10
32.65	3.33333
32.66	3.33333
32.67	6.66667
32.68	3.33333
32.69	6.66667
32.7	3.33333
32.71	0
32.72	10
32.73	13.3333
32.74	6.66667
32.75	0
32.76	3.33333
32.77	6.66667
32.78	10
32.79	0
32.8	0
32.81	10
32.82	3.33333
32.83	6.66667
32.84	3.33333
32.85	3.33333
32.86	3.33333
32.87	3.33333
32.88	10
32.89	3.33333
32.9	6.66667
32.91	3.33333
32.92	3.33333
32.93	3.33333
32.94	6.66667
32.95	3.33333
32.96	13.3333
32.97	0
32.98	6.66667
32.99	13.3333
33	6.66667

## Sheet: ambu-shaft03
2θ	intensity
27	10
27.01	6.66667
27.02	0
27.03	6.66667
27.04	6.66667
27.05	13.3333
27.06	13.3333
27.07	6.66667
27.08	10
27.09	6.66667
27.1	10
27.11	10
27.12	6.66667
27.13	3.33333
27.14	0
27.15	3.33333
27.16	0
27.17	3.33333
27.18	13.3333
27.19	10
27.2	3.33333
27.21	0
27.22	10
27.23	0
27.24	10
27.25	10
27.26	3.33333
27.27	6.66667
27.28	10
27.29	3.33333
27.3	0
27.31	10
27.32	13.3333
27.33	16.6667
27.34	3.33333
27.35	6.66667
27.36	10
27.37	3.33333
27.38	16.6667
27.39	3.33333
27.4	13.3333
27.41	3.33333
27.42	10
27.43	13.3333
27.44	6.66667
27.45	13.3333
27.46	16.6667
27.47	6.66667
27.48	6.66667
27.49	0
27.5	0
27.51	10
27.52	10
27.53	10
27.54	6.66667
27.55	0
27.56	3.33333
27.57	10
27.58	10
27.59	3.33333
27.6	13.3333
27.61	13.3333
27.62	13.3333
27.63	6.66667
27.64	16.6667
27.65	6.66667
27.66	10
27.67	0
27.68	10
27.69	20
27.7	16.6667
27.71	10
27.72	10
27.73	6.66667
27.74	0
27.75	10
27.76	6.66667
27.77	3.33333
27.78	6.66667
27.79	13.3333
27.8	20
27.81	6.66667
27.82	3.33333
27.83	10
27.84	6.66667
27.85	10
27.86	0
27.87	16.6667
27.88	6.66667
27.89	6.66667
27.9	13.3333
27.91	10
27.92	6.66667
27.93	10
27.94	10
27.95	3.33333
27.96	20
27.97	20
27.98	23.3333
27.99	16.6667
28	3.33333
28.01	3.33333
28.02	13.3333
28.03	6.66667
28.04	20
28.05	16.6667
28.06	26.6667
28.07	20
28.08	6.66667
28.09	26.6667
28.1	20
28.11	3.33333
28.12	16.6667
28.13	26.6667
28.14	20
28.15	30
28.16	13.3333
28.17	33.3333
28.18	20
28.19	23.3333
28.2	26.6667
28.21	30
28.22	33.3333
28.23	36.6667
28.24	56.6667
28.25	46.6667
28.26	36.6667
28.27	56.6667
28.28	43.3333
28.29	83.3333
28.3	63.3333
28.31	80
28.32	140
28.33	66.6667
28.34	96.6667
28.35	100
28.36	120
28.37	126.667
28.38	166.667
28.39	190
28.4	246.667
28.41	223.333
28.42	210
28.43	216.667
28.44	223.333
28.45	246.667
28.46	180
28.47	243.333
28.48	166.667
28.49	240
28.5	176.667
28.51	176.667
28.52	126.667
28.53	133.333
28.54	113.333
28.55	116.667
28.56	90
28.57	53.3333
28.58	46.6667
28.59	43.3333
28.6	33.3333
28.61	20
28.62	30
28.63	23.3333
28.64	23.3333
28.65	20
28.66	26.6667
28.67	23.3333
28.68	13.3333
28.69	13.3333
28.7	6.66667
28.71	20
28.72	20
28.73	10
28.74	10
28.75	6.66667
28.76	13.3333
28.77	6.66667
28.78	13.3333
28.79	16.6667
28.8	16.6667
28.81	20
28.82	20
28.83	13.3333
28.84	16.6667
28.85	13.3333
28.86	26.6667
28.87	10
28.88	16.6667
28.89	16.6667
28.9	30
28.91	13.3333
28.92	10
28.93	13.3333
28.94	16.6667
28.95	6.66667
28.96	16.6667
28.97	16.6667
28.98	6.66667
28.99	30
29	26.6667
29.01	23.3333
29.02	33.3333
29.03	30
29.04	26.6667
29.05	46.6667
29.06	40
29.07	36.6667
29.08	43.3333
29.09	33.3333
29.1	50
29.11	36.6667
29.12	43.3333
29.13	36.6667
29.14	40
29.15	56.6667
29.16	26.6667
29.17	40
29.18	40
29.19	53.3333
29.2	76.6667
29.21	70
29.22	73.3333
29.23	90
29.24	80
29.25	96.6667
29.26	80
29.27	113.333
29.28	120
29.29	103.333
29.3	120
29.31	146.667
29.32	163.333
29.33	140
29.34	186.667
29.35	243.333
29.36	213.333
29.37	240
29.38	273.333
29.39	340
29.4	280
29.41	390
29.42	473.333
29.43	533.333
29.44	526.667
29.45	660
29.46	773.333
29.47	973.333
29.48	980
29.49	1046.67
29.5	1246.67
29.51	1276.67
29.52	1460
29.53	1506.67
29.54	1396.67
29.55	1493.33
29.56	1146.67
29.57	940
29.58	856.667
29.59	803.333
29.6	700
29.61	686.667
29.62	576.667
29.63	503.333
29.64	420
29.65	276.667
29.66	153.333
29.67	143.333
29.68	83.3333
29.69	63.3333
29.7	53.3333
29.71	70
29.72	53.3333
29.73	30
29.74	46.6667
29.75	26.6667
29.76	40
29.77	10
29.78	36.6667
29.79	13.3333
29.8	20
29.81	33.3333
29.82	26.6667
29.83	23.3333
29.84	16.6667
29.85	10
29.86	13.3333
29.87	26.6667
29.88	16.6667
29.89	30
29.9	0
29.91	30
29.92	6.66667
29.93	20
29.94	16.6667
29.95	6.66667
29.96	3.33333
29.97	6.66667
29.98	13.3333
29.99	10
30	16.6667
30.01	20
30.02	20
30.03	16.6667
30.04	3.33333
30.05	10
30.06	20
30.07	13.3333
30.08	10
30.09	26.6667
30.1	16.6667
30.11	20
30.12	6.66667
30.13	13.3333
30.14	10
30.15	13.3333
30.16	13.3333
30.17	23.3333
30.18	6.66667
30.19	13.3333
30.2	10
30.21	13.3333
30.22	30
30.23	13.3333
30.24	10
30.25	23.3333
30.26	3.33333
30.27	6.66667
30.28	6.66667
30.29	16.6667
30.3	3.33333
30.31	6.66667
30.32	20
30.33	6.66667
30.34	16.6667
30.35	16.6667
30.36	10
30.37	0
30.38	10
30.39	13.3333
30.4	6.66667
30.41	10
30.42	10
30.43	16.6667
30.44	13.3333
30.45	3.33333
30.46	6.66667
30.47	6.66667
30.48	10
30.49	16.6667
30.5	13.3333
30.51	3.33333
30.52	16.6667
30.53	3.33333
30.54	0
30.55	10
30.56	13.3333
30.57	13.3333
30.58	3.33333
30.59	13.3333
30.6	13.3333
30.61	30
30.62	10
30.63	3.33333
30.64	10
30.65	10
30.66	3.33333
30.67	10
30.68	10
30.69	0
30.7	10
30.71	6.66667
30.72	10
30.73	6.66667
30.74	10
30.75	3.33333
30.76	3.33333
30.77	13.3333
30.78	3.33333
30.79	10
30.8	10
30.81	3.33333
30.82	23.3333
30.83	20
30.84	13.3333
30.85	0
30.86	0
30.87	6.66667
30.88	13.3333
30.89	3.33333
30.9	13.3333
30.91	3.33333
30.92	13.3333
30.93	10
30.94	0
30.95	6.66667
30.96	6.66667
30.97	0
30.98	10
30.99	6.66667
31	3.33333
31.01	3.33333
31.02	13.3333
31.03	3.33333
31.04	3.33333
31.05	3.33333
31.06	6.66667
31.07	13.3333
31.08	6.66667
31.09	6.66667
31.1	6.66667
31.11	6.66667
31.12	3.33333
31.13	6.66667
31.14	10
31.15	3.33333
31.16	16.6667
31.17	3.33333
31.18	6.66667
31.19	3.33333
31.2	16.6667
31.21	3.33333
31.22	6.66667
31.23	6.66667
31.24	3.33333
31.25	6.66667
31.26	10
31.27	16.6667
31.28	13.3333
31.29	0
31.3	13.3333
31.31	23.3333
31.32	10
31.33	10
31.34	13.3333
31.35	6.66667
31.36	13.3333
31.37	13.3333
31.38	10
31.39	16.6667
31.4	10
31.41	26.6667
31.42	13.3333
31.43	3.33333
31.44	10
31.45	10
31.46	6.66667
31.47	16.6667
31.48	20
31.49	20
31.5	10
31.51	10
31.52	20
31.53	40
31.54	30
31.55	26.6667
31.56	16.6667
31.57	26.6667
31.58	23.3333
31.59	33.3333
31.6	36.6667
31.61	33.3333
31.62	23.3333
31.63	10
31.64	23.3333
31.65	23.3333
31.66	10
31.67	6.66667
31.68	16.6667
31.69	13.3333
31.7	16.6667
31.71	26.6667
31.72	20
31.73	10
31.74	13.3333
31.75	16.6667
31.76	0
31.77	6.66667
31.78	0
31.79	3.33333
31.8	0
31.81	3.33333
31.82	6.66667
31.83	10
31.84	0
31.85	10
31.86	6.66667
31.87	10
31.88	6.66667
31.89	10
31.9	0
31.91	3.33333
31.92	13.3333
31.93	3.33333
31.94	3.33333
31.95	6.66667
31.96	6.66667
31.97	6.66667
31.98	6.66667
31.99	0
32	6.66667
32.01	6.66667
32.02	6.66667
32.03	3.33333
32.04	10
32.05	6.66667
32.06	16.6667
32.07	0
32.08	6.66667
32.09	0
32.1	16.6667
32.11	6.66667
32.12	3.33333
32.13	10
32.14	20
32.15	3.33333
32.16	6.66667
32.17	10
32.18	10
32.19	3.33333
32.2	3.33333
32.21	0
32.22	10
32.23	13.3333
32.24	13.3333
32.25	3.33333
32.26	6.66667
32.27	0
32.28	6.66667
32.29	0
32.3	3.33333
32.31	10
32.32	13.3333
32.33	0
32.34	13.3333
32.35	6.66667
32.36	10
32.37	0
32.38	0
32.39	3.33333
32.4	10
32.41	0
32.42	10
32.43	10
32.44	10
32.45	6.66667
32.46	6.66667
32.47	10
32.48	23.3333
32.49	6.66667
32.5	3.33333
32.51	0
32.52	3.33333
32.53	16.6667
32.54	6.66667
32.55	10
32.56	10
32.57	3.33333
32.58	16.6667
32.59	6.66667
32.6	3.33333
32.61	6.66667
32.62	0
32.63	3.33333
32.64	6.66667
32.65	6.66667
32.66	0
32.67	0
32.68	0
32.69	13.3333
32.7	3.33333
32.71	10
32.72	0
32.73	13.3333
32.74	0
32.75	0
32.76	0
32.77	3.33333
32.78	3.33333
32.79	6.66667
32.8	3.33333
32.81	0
32.82	3.33333
32.83	3.33333
32.84	13.3333
32.85	6.66667
32.86	3.33333
32.87	6.66667
32.88	16.6667
32.89	3.33333
32.9	13.3333
32.91	3.33333
32.92	3.33333
32.93	0
32.94	10
32.95	3.33333
32.96	0
32.97	3.33333
32.98	0
32.99	3.33333
33	3.33333
