# Supplementary material for: Mechanical and chemical element structures of sea urchin spines: specialization in ambulacral and interambulacral areas
Source: PeerJ journal article supplement (doi:10.7717/peerj-matsci.38), 2025-07-30
Supplement: XRDinterambu.xlsx [file XRDinterambu.xlsx]

## Sheet: interambu-base01
2θ	intensity
27	6.66667
27.01	6.66667
27.02	3.33333
27.03	10
27.04	6.66667
27.05	13.3333
27.06	3.33333
27.07	6.66667
27.08	10
27.09	6.66667
27.1	10
27.11	6.66667
27.12	16.6667
27.13	10
27.14	3.33333
27.15	6.66667
27.16	6.66667
27.17	3.33333
27.18	16.6667
27.19	6.66667
27.2	23.3333
27.21	3.33333
27.22	13.3333
27.23	3.33333
27.24	16.6667
27.25	10
27.26	10
27.27	3.33333
27.28	3.33333
27.29	3.33333
27.3	6.66667
27.31	13.3333
27.32	6.66667
27.33	0
27.34	13.3333
27.35	6.66667
27.36	10
27.37	16.6667
27.38	13.3333
27.39	13.3333
27.4	10
27.41	6.66667
27.42	13.3333
27.43	10
27.44	6.66667
27.45	3.33333
27.46	20
27.47	13.3333
27.48	13.3333
27.49	10
27.5	10
27.51	6.66667
27.52	6.66667
27.53	20
27.54	20
27.55	6.66667
27.56	10
27.57	6.66667
27.58	10
27.59	0
27.6	10
27.61	13.3333
27.62	20
27.63	6.66667
27.64	3.33333
27.65	6.66667
27.66	10
27.67	10
27.68	10
27.69	3.33333
27.7	10
27.71	13.3333
27.72	23.3333
27.73	16.6667
27.74	23.3333
27.75	10
27.76	16.6667
27.77	16.6667
27.78	6.66667
27.79	20
27.8	3.33333
27.81	3.33333
27.82	6.66667
27.83	20
27.84	6.66667
27.85	3.33333
27.86	20
27.87	20
27.88	6.66667
27.89	20
27.9	16.6667
27.91	13.3333
27.92	20
27.93	3.33333
27.94	30
27.95	6.66667
27.96	26.6667
27.97	26.6667
27.98	13.3333
27.99	16.6667
28	36.6667
28.01	10
28.02	50
28.03	26.6667
28.04	23.3333
28.05	43.3333
28.06	36.6667
28.07	30
28.08	36.6667
28.09	40
28.1	56.6667
28.11	50
28.12	60
28.13	76.6667
28.14	50
28.15	53.3333
28.16	60
28.17	96.6667
28.18	63.3333
28.19	86.6667
28.2	73.3333
28.21	113.333
28.22	106.667
28.23	123.333
28.24	160
28.25	156.667
28.26	173.333
28.27	113.333
28.28	190
28.29	246.667
28.3	263.333
28.31	223.333
28.32	296.667
28.33	346.667
28.34	353.333
28.35	373.333
28.36	430
28.37	423.333
28.38	400
28.39	453.333
28.4	456.667
28.41	370
28.42	423.333
28.43	356.667
28.44	400
28.45	350
28.46	286.667
28.47	200
28.48	200
28.49	126.667
28.5	140
28.51	153.333
28.52	83.3333
28.53	73.3333
28.54	56.6667
28.55	76.6667
28.56	53.3333
28.57	40
28.58	30
28.59	30
28.6	10
28.61	23.3333
28.62	26.6667
28.63	26.6667
28.64	23.3333
28.65	16.6667
28.66	20
28.67	60
28.68	13.3333
28.69	26.6667
28.7	16.6667
28.71	36.6667
28.72	20
28.73	20
28.74	20
28.75	23.3333
28.76	26.6667
28.77	13.3333
28.78	23.3333
28.79	16.6667
28.8	20
28.81	23.3333
28.82	20
28.83	13.3333
28.84	20
28.85	20
28.86	23.3333
28.87	10
28.88	23.3333
28.89	20
28.9	26.6667
28.91	13.3333
28.92	20
28.93	33.3333
28.94	30
28.95	10
28.96	30
28.97	30
28.98	36.6667
28.99	23.3333
29	40
29.01	23.3333
29.02	26.6667
29.03	30
29.04	46.6667
29.05	53.3333
29.06	50
29.07	53.3333
29.08	76.6667
29.09	63.3333
29.1	50
29.11	43.3333
29.12	60
29.13	46.6667
29.14	53.3333
29.15	56.6667
29.16	86.6667
29.17	70
29.18	80
29.19	80
29.2	73.3333
29.21	76.6667
29.22	136.667
29.23	80
29.24	100
29.25	86.6667
29.26	120
29.27	100
29.28	110
29.29	150
29.3	180
29.31	203.333
29.32	260
29.33	220
29.34	246.667
29.35	310
29.36	366.667
29.37	343.333
29.38	390
29.39	303.333
29.4	520
29.41	540
29.42	576.667
29.43	620
29.44	466.667
29.45	516.667
29.46	520
29.47	526.667
29.48	550
29.49	606.667
29.5	673.333
29.51	700
29.52	836.667
29.53	870
29.54	740
29.55	703.333
29.56	670
29.57	523.333
29.58	330
29.59	343.333
29.6	350
29.61	363.333
29.62	300
29.63	290
29.64	223.333
29.65	156.667
29.66	126.667
29.67	86.6667
29.68	63.3333
29.69	66.6667
29.7	60
29.71	30
29.72	36.6667
29.73	33.3333
29.74	36.6667
29.75	30
29.76	40
29.77	30
29.78	23.3333
29.79	16.6667
29.8	23.3333
29.81	20
29.82	23.3333
29.83	26.6667
29.84	26.6667
29.85	20
29.86	30
29.87	16.6667
29.88	16.6667
29.89	10
29.9	20
29.91	20
29.92	10
29.93	10
29.94	16.6667
29.95	10
29.96	3.33333
29.97	16.6667
29.98	20
29.99	10
30	20
30.01	13.3333
30.02	16.6667
30.03	3.33333
30.04	6.66667
30.05	10
30.06	16.6667
30.07	16.6667
30.08	13.3333
30.09	6.66667
30.1	13.3333
30.11	26.6667
30.12	13.3333
30.13	10
30.14	6.66667
30.15	6.66667
30.16	23.3333
30.17	10
30.18	10
30.19	16.6667
30.2	13.3333
30.21	16.6667
30.22	13.3333
30.23	10
30.24	3.33333
30.25	6.66667
30.26	6.66667
30.27	20
30.28	6.66667
30.29	10
30.3	23.3333
30.31	13.3333
30.32	16.6667
30.33	16.6667
30.34	16.6667
30.35	10
30.36	10
30.37	13.3333
30.38	6.66667
30.39	6.66667
30.4	10
30.41	6.66667
30.42	13.3333
30.43	6.66667
30.44	20
30.45	10
30.46	20
30.47	23.3333
30.48	10
30.49	20
30.5	13.3333
30.51	13.3333
30.52	6.66667
30.53	3.33333
30.54	10
30.55	3.33333
30.56	10
30.57	13.3333
30.58	6.66667
30.59	3.33333
30.6	10
30.61	3.33333
30.62	6.66667
30.63	3.33333
30.64	10
30.65	10
30.66	3.33333
30.67	10
30.68	3.33333
30.69	13.3333
30.7	10
30.71	20
30.72	13.3333
30.73	10
30.74	0
30.75	13.3333
30.76	10
30.77	13.3333
30.78	6.66667
30.79	6.66667
30.8	13.3333
30.81	13.3333
30.82	13.3333
30.83	13.3333
30.84	13.3333
30.85	16.6667
30.86	0
30.87	6.66667
30.88	16.6667
30.89	13.3333
30.9	16.6667
30.91	10
30.92	3.33333
30.93	6.66667
30.94	6.66667
30.95	13.3333
30.96	10
30.97	6.66667
30.98	3.33333
30.99	13.3333
31	10
31.01	3.33333
31.02	6.66667
31.03	0
31.04	6.66667
31.05	13.3333
31.06	10
31.07	0
31.08	16.6667
31.09	13.3333
31.1	6.66667
31.11	10
31.12	10
31.13	10
31.14	10
31.15	16.6667
31.16	10
31.17	10
31.18	6.66667
31.19	3.33333
31.2	3.33333
31.21	16.6667
31.22	10
31.23	10
31.24	6.66667
31.25	10
31.26	0
31.27	6.66667
31.28	0
31.29	3.33333
31.3	3.33333
31.31	6.66667
31.32	13.3333
31.33	3.33333
31.34	26.6667
31.35	6.66667
31.36	10
31.37	10
31.38	6.66667
31.39	6.66667
31.4	6.66667
31.41	10
31.42	23.3333
31.43	40
31.44	10
31.45	13.3333
31.46	16.6667
31.47	13.3333
31.48	20
31.49	3.33333
31.5	13.3333
31.51	33.3333
31.52	20
31.53	23.3333
31.54	26.6667
31.55	20
31.56	26.6667
31.57	23.3333
31.58	26.6667
31.59	33.3333
31.6	16.6667
31.61	16.6667
31.62	20
31.63	13.3333
31.64	16.6667
31.65	26.6667
31.66	10
31.67	16.6667
31.68	13.3333
31.69	13.3333
31.7	16.6667
31.71	16.6667
31.72	6.66667
31.73	3.33333
31.74	13.3333
31.75	10
31.76	3.33333
31.77	3.33333
31.78	6.66667
31.79	6.66667
31.8	3.33333
31.81	10
31.82	13.3333
31.83	3.33333
31.84	13.3333
31.85	3.33333
31.86	3.33333
31.87	10
31.88	23.3333
31.89	10
31.9	3.33333
31.91	6.66667
31.92	6.66667
31.93	16.6667
31.94	3.33333
31.95	10
31.96	3.33333
31.97	3.33333
31.98	13.3333
31.99	13.3333
32	10
32.01	6.66667
32.02	13.3333
32.03	3.33333
32.04	3.33333
32.05	16.6667
32.06	16.6667
32.07	0
32.08	6.66667
32.09	10
32.1	3.33333
32.11	3.33333
32.12	6.66667
32.13	6.66667
32.14	3.33333
32.15	6.66667
32.16	10
32.17	16.6667
32.18	10
32.19	10
32.2	6.66667
32.21	0
32.22	3.33333
32.23	0
32.24	3.33333
32.25	13.3333
32.26	3.33333
32.27	3.33333
32.28	0
32.29	6.66667
32.3	13.3333
32.31	3.33333
32.32	13.3333
32.33	10
32.34	20
32.35	10
32.36	6.66667
32.37	6.66667
32.38	10
32.39	10
32.4	6.66667
32.41	3.33333
32.42	6.66667
32.43	10
32.44	16.6667
32.45	13.3333
32.46	6.66667
32.47	6.66667
32.48	3.33333
32.49	3.33333
32.5	20
32.51	6.66667
32.52	3.33333
32.53	6.66667
32.54	3.33333
32.55	6.66667
32.56	6.66667
32.57	6.66667
32.58	16.6667
32.59	10
32.6	10
32.61	3.33333
32.62	16.6667
32.63	0
32.64	6.66667
32.65	10
32.66	3.33333
32.67	10
32.68	6.66667
32.69	3.33333
32.7	6.66667
32.71	13.3333
32.72	6.66667
32.73	16.6667
32.74	0
32.75	16.6667
32.76	3.33333
32.77	3.33333
32.78	10
32.79	10
32.8	3.33333
32.81	10
32.82	3.33333
32.83	6.66667
32.84	6.66667
32.85	10
32.86	0
32.87	3.33333
32.88	20
32.89	0
32.9	6.66667
32.91	13.3333
32.92	6.66667
32.93	3.33333
32.94	6.66667
32.95	3.33333
32.96	6.66667
32.97	10
32.98	0
32.99	10
33	10

## Sheet: interambu-base02
2θ	intensity
27	3.33333
27.01	6.66667
27.02	16.6667
27.03	10
27.04	13.3333
27.05	10
27.06	10
27.07	10
27.08	0
27.09	6.66667
27.1	6.66667
27.11	20
27.12	16.6667
27.13	3.33333
27.14	13.3333
27.15	3.33333
27.16	6.66667
27.17	3.33333
27.18	6.66667
27.19	23.3333
27.2	13.3333
27.21	0
27.22	0
27.23	6.66667
27.24	3.33333
27.25	10
27.26	20
27.27	6.66667
27.28	6.66667
27.29	3.33333
27.3	6.66667
27.31	3.33333
27.32	16.6667
27.33	0
27.34	10
27.35	3.33333
27.36	10
27.37	10
27.38	3.33333
27.39	10
27.4	3.33333
27.41	16.6667
27.42	16.6667
27.43	6.66667
27.44	10
27.45	3.33333
27.46	10
27.47	3.33333
27.48	26.6667
27.49	13.3333
27.5	3.33333
27.51	13.3333
27.52	6.66667
27.53	0
27.54	10
27.55	3.33333
27.56	10
27.57	13.3333
27.58	3.33333
27.59	0
27.6	6.66667
27.61	10
27.62	3.33333
27.63	10
27.64	3.33333
27.65	20
27.66	3.33333
27.67	13.3333
27.68	10
27.69	16.6667
27.7	6.66667
27.71	13.3333
27.72	3.33333
27.73	20
27.74	6.66667
27.75	3.33333
27.76	6.66667
27.77	26.6667
27.78	13.3333
27.79	26.6667
27.8	6.66667
27.81	20
27.82	23.3333
27.83	16.6667
27.84	13.3333
27.85	10
27.86	20
27.87	6.66667
27.88	20
27.89	20
27.9	10
27.91	6.66667
27.92	16.6667
27.93	10
27.94	13.3333
27.95	20
27.96	13.3333
27.97	30
27.98	20
27.99	20
28	13.3333
28.01	16.6667
28.02	16.6667
28.03	23.3333
28.04	30
28.05	43.3333
28.06	30
28.07	33.3333
28.08	30
28.09	30
28.1	56.6667
28.11	46.6667
28.12	36.6667
28.13	50
28.14	76.6667
28.15	53.3333
28.16	80
28.17	70
28.18	50
28.19	93.3333
28.2	70
28.21	100
28.22	103.333
28.23	113.333
28.24	130
28.25	120
28.26	136.667
28.27	186.667
28.28	166.667
28.29	183.333
28.3	256.667
28.31	300
28.32	296.667
28.33	323.333
28.34	310
28.35	320
28.36	346.667
28.37	330
28.38	336.667
28.39	366.667
28.4	380
28.41	353.333
28.42	263.333
28.43	326.667
28.44	253.333
28.45	206.667
28.46	176.667
28.47	183.333
28.48	166.667
28.49	156.667
28.5	106.667
28.51	73.3333
28.52	63.3333
28.53	60
28.54	63.3333
28.55	40
28.56	26.6667
28.57	26.6667
28.58	20
28.59	33.3333
28.6	13.3333
28.61	13.3333
28.62	10
28.63	33.3333
28.64	13.3333
28.65	10
28.66	13.3333
28.67	16.6667
28.68	13.3333
28.69	26.6667
28.7	20
28.71	16.6667
28.72	13.3333
28.73	23.3333
28.74	13.3333
28.75	3.33333
28.76	10
28.77	20
28.78	10
28.79	13.3333
28.8	20
28.81	6.66667
28.82	10
28.83	16.6667
28.84	6.66667
28.85	30
28.86	10
28.87	30
28.88	10
28.89	20
28.9	16.6667
28.91	36.6667
28.92	20
28.93	10
28.94	23.3333
28.95	13.3333
28.96	3.33333
28.97	13.3333
28.98	23.3333
28.99	23.3333
29	26.6667
29.01	30
29.02	16.6667
29.03	13.3333
29.04	33.3333
29.05	30
29.06	36.6667
29.07	33.3333
29.08	40
29.09	40
29.1	36.6667
29.11	60
29.12	70
29.13	50
29.14	43.3333
29.15	43.3333
29.16	50
29.17	60
29.18	53.3333
29.19	60
29.2	36.6667
29.21	66.6667
29.22	110
29.23	136.667
29.24	140
29.25	113.333
29.26	103.333
29.27	126.667
29.28	126.667
29.29	200
29.3	206.667
29.31	216.667
29.32	260
29.33	353.333
29.34	373.333
29.35	503.333
29.36	546.667
29.37	706.667
29.38	720
29.39	600
29.4	733.333
29.41	663.333
29.42	740
29.43	763.333
29.44	810
29.45	893.333
29.46	906.667
29.47	826.667
29.48	873.333
29.49	790
29.5	920
29.51	740
29.52	726.667
29.53	703.333
29.54	656.667
29.55	586.667
29.56	553.333
29.57	473.333
29.58	383.333
29.59	343.333
29.6	256.667
29.61	286.667
29.62	233.333
29.63	210
29.64	130
29.65	110
29.66	123.333
29.67	96.6667
29.68	66.6667
29.69	50
29.7	46.6667
29.71	53.3333
29.72	43.3333
29.73	40
29.74	23.3333
29.75	40
29.76	23.3333
29.77	20
29.78	30
29.79	36.6667
29.8	13.3333
29.81	16.6667
29.82	20
29.83	30
29.84	23.3333
29.85	36.6667
29.86	13.3333
29.87	13.3333
29.88	13.3333
29.89	16.6667
29.9	23.3333
29.91	6.66667
29.92	10
29.93	16.6667
29.94	20
29.95	6.66667
29.96	26.6667
29.97	10
29.98	3.33333
29.99	13.3333
30	16.6667
30.01	10
30.02	10
30.03	30
30.04	6.66667
30.05	13.3333
30.06	20
30.07	13.3333
30.08	20
30.09	6.66667
30.1	20
30.11	16.6667
30.12	10
30.13	3.33333
30.14	6.66667
30.15	13.3333
30.16	13.3333
30.17	30
30.18	13.3333
30.19	26.6667
30.2	13.3333
30.21	10
30.22	20
30.23	3.33333
30.24	10
30.25	13.3333
30.26	10
30.27	6.66667
30.28	13.3333
30.29	10
30.3	23.3333
30.31	6.66667
30.32	10
30.33	6.66667
30.34	16.6667
30.35	16.6667
30.36	16.6667
30.37	10
30.38	16.6667
30.39	6.66667
30.4	10
30.41	16.6667
30.42	23.3333
30.43	6.66667
30.44	6.66667
30.45	13.3333
30.46	13.3333
30.47	20
30.48	0
30.49	6.66667
30.5	6.66667
30.51	13.3333
30.52	16.6667
30.53	13.3333
30.54	6.66667
30.55	3.33333
30.56	10
30.57	0
30.58	3.33333
30.59	13.3333
30.6	13.3333
30.61	10
30.62	10
30.63	16.6667
30.64	13.3333
30.65	0
30.66	3.33333
30.67	16.6667
30.68	3.33333
30.69	3.33333
30.7	3.33333
30.71	10
30.72	13.3333
30.73	6.66667
30.74	10
30.75	10
30.76	20
30.77	10
30.78	0
30.79	13.3333
30.8	10
30.81	3.33333
30.82	6.66667
30.83	10
30.84	3.33333
30.85	16.6667
30.86	3.33333
30.87	6.66667
30.88	6.66667
30.89	10
30.9	6.66667
30.91	3.33333
30.92	13.3333
30.93	6.66667
30.94	10
30.95	16.6667
30.96	20
30.97	6.66667
30.98	3.33333
30.99	3.33333
31	3.33333
31.01	0
31.02	10
31.03	6.66667
31.04	6.66667
31.05	13.3333
31.06	6.66667
31.07	10
31.08	0
31.09	13.3333
31.1	16.6667
31.11	10
31.12	13.3333
31.13	10
31.14	13.3333
31.15	26.6667
31.16	3.33333
31.17	6.66667
31.18	16.6667
31.19	0
31.2	13.3333
31.21	10
31.22	6.66667
31.23	6.66667
31.24	13.3333
31.25	3.33333
31.26	10
31.27	13.3333
31.28	16.6667
31.29	10
31.3	16.6667
31.31	3.33333
31.32	3.33333
31.33	6.66667
31.34	6.66667
31.35	13.3333
31.36	6.66667
31.37	10
31.38	10
31.39	10
31.4	20
31.41	13.3333
31.42	10
31.43	23.3333
31.44	10
31.45	23.3333
31.46	16.6667
31.47	13.3333
31.48	16.6667
31.49	20
31.5	20
31.51	23.3333
31.52	23.3333
31.53	23.3333
31.54	20
31.55	26.6667
31.56	16.6667
31.57	23.3333
31.58	40
31.59	26.6667
31.6	20
31.61	20
31.62	6.66667
31.63	30
31.64	10
31.65	30
31.66	13.3333
31.67	23.3333
31.68	20
31.69	10
31.7	16.6667
31.71	6.66667
31.72	16.6667
31.73	3.33333
31.74	6.66667
31.75	10
31.76	6.66667
31.77	10
31.78	13.3333
31.79	3.33333
31.8	3.33333
31.81	3.33333
31.82	10
31.83	6.66667
31.84	10
31.85	6.66667
31.86	3.33333
31.87	13.3333
31.88	0
31.89	13.3333
31.9	6.66667
31.91	6.66667
31.92	3.33333
31.93	6.66667
31.94	13.3333
31.95	6.66667
31.96	0
31.97	3.33333
31.98	16.6667
31.99	3.33333
32	3.33333
32.01	10
32.02	10
32.03	10
32.04	6.66667
32.05	10
32.06	0
32.07	10
32.08	6.66667
32.09	0
32.1	3.33333
32.11	3.33333
32.12	3.33333
32.13	6.66667
32.14	6.66667
32.15	3.33333
32.16	3.33333
32.17	13.3333
32.18	6.66667
32.19	10
32.2	6.66667
32.21	10
32.22	3.33333
32.23	3.33333
32.24	13.3333
32.25	10
32.26	13.3333
32.27	3.33333
32.28	6.66667
32.29	6.66667
32.3	6.66667
32.31	0
32.32	20
32.33	13.3333
32.34	0
32.35	0
32.36	6.66667
32.37	3.33333
32.38	3.33333
32.39	10
32.4	10
32.41	3.33333
32.42	10
32.43	3.33333
32.44	10
32.45	10
32.46	10
32.47	0
32.48	0
32.49	6.66667
32.5	10
32.51	6.66667
32.52	10
32.53	3.33333
32.54	6.66667
32.55	10
32.56	3.33333
32.57	3.33333
32.58	10
32.59	13.3333
32.6	3.33333
32.61	6.66667
32.62	13.3333
32.63	3.33333
32.64	3.33333
32.65	10
32.66	13.3333
32.67	6.66667
32.68	3.33333
32.69	0
32.7	0
32.71	3.33333
32.72	3.33333
32.73	6.66667
32.74	16.6667
32.75	0
32.76	6.66667
32.77	6.66667
32.78	13.3333
32.79	3.33333
32.8	3.33333
32.81	3.33333
32.82	6.66667
32.83	3.33333
32.84	0
32.85	10
32.86	6.66667
32.87	6.66667
32.88	6.66667
32.89	6.66667
32.9	10
32.91	10
32.92	6.66667
32.93	3.33333
32.94	6.66667
32.95	13.3333
32.96	6.66667
32.97	10
32.98	0
32.99	6.66667
33	13.3333

## Sheet: interambu-base03
2θ	intensity
27	13.3333
27.01	6.66667
27.02	13.3333
27.03	10
27.04	3.33333
27.05	10
27.06	3.33333
27.07	10
27.08	6.66667
27.09	13.3333
27.1	10
27.11	6.66667
27.12	10
27.13	0
27.14	20
27.15	6.66667
27.16	3.33333
27.17	3.33333
27.18	3.33333
27.19	16.6667
27.2	6.66667
27.21	6.66667
27.22	13.3333
27.23	3.33333
27.24	10
27.25	16.6667
27.26	3.33333
27.27	10
27.28	20
27.29	3.33333
27.3	10
27.31	26.6667
27.32	10
27.33	3.33333
27.34	10
27.35	10
27.36	6.66667
27.37	6.66667
27.38	10
27.39	6.66667
27.4	10
27.41	16.6667
27.42	6.66667
27.43	16.6667
27.44	6.66667
27.45	10
27.46	16.6667
27.47	13.3333
27.48	6.66667
27.49	6.66667
27.5	3.33333
27.51	6.66667
27.52	6.66667
27.53	10
27.54	6.66667
27.55	10
27.56	6.66667
27.57	20
27.58	13.3333
27.59	13.3333
27.6	16.6667
27.61	13.3333
27.62	3.33333
27.63	10
27.64	10
27.65	16.6667
27.66	16.6667
27.67	13.3333
27.68	0
27.69	6.66667
27.7	26.6667
27.71	3.33333
27.72	10
27.73	3.33333
27.74	10
27.75	20
27.76	6.66667
27.77	6.66667
27.78	10
27.79	3.33333
27.8	20
27.81	16.6667
27.82	6.66667
27.83	13.3333
27.84	10
27.85	23.3333
27.86	13.3333
27.87	30
27.88	13.3333
27.89	10
27.9	3.33333
27.91	13.3333
27.92	13.3333
27.93	10
27.94	13.3333
27.95	13.3333
27.96	13.3333
27.97	23.3333
27.98	23.3333
27.99	20
28	16.6667
28.01	23.3333
28.02	20
28.03	36.6667
28.04	3.33333
28.05	33.3333
28.06	16.6667
28.07	33.3333
28.08	20
28.09	33.3333
28.1	13.3333
28.11	36.6667
28.12	40
28.13	40
28.14	60
28.15	46.6667
28.16	46.6667
28.17	50
28.18	53.3333
28.19	46.6667
28.2	83.3333
28.21	90
28.22	113.333
28.23	96.6667
28.24	133.333
28.25	103.333
28.26	96.6667
28.27	143.333
28.28	140
28.29	213.333
28.3	213.333
28.31	260
28.32	210
28.33	306.667
28.34	326.667
28.35	390
28.36	380
28.37	366.667
28.38	370
28.39	426.667
28.4	466.667
28.41	446.667
28.42	450
28.43	453.333
28.44	390
28.45	336.667
28.46	323.333
28.47	326.667
28.48	293.333
28.49	213.333
28.5	193.333
28.51	170
28.52	143.333
28.53	140
28.54	103.333
28.55	80
28.56	83.3333
28.57	70
28.58	66.6667
28.59	26.6667
28.6	20
28.61	40
28.62	23.3333
28.63	23.3333
28.64	3.33333
28.65	26.6667
28.66	13.3333
28.67	26.6667
28.68	26.6667
28.69	16.6667
28.7	23.3333
28.71	23.3333
28.72	13.3333
28.73	13.3333
28.74	26.6667
28.75	13.3333
28.76	26.6667
28.77	10
28.78	13.3333
28.79	16.6667
28.8	23.3333
28.81	16.6667
28.82	20
28.83	10
28.84	16.6667
28.85	13.3333
28.86	16.6667
28.87	30
28.88	13.3333
28.89	20
28.9	10
28.91	16.6667
28.92	3.33333
28.93	30
28.94	13.3333
28.95	23.3333
28.96	20
28.97	10
28.98	36.6667
28.99	10
29	13.3333
29.01	13.3333
29.02	50
29.03	36.6667
29.04	16.6667
29.05	30
29.06	20
29.07	16.6667
29.08	10
29.09	23.3333
29.1	20
29.11	53.3333
29.12	33.3333
29.13	33.3333
29.14	43.3333
29.15	66.6667
29.16	60
29.17	50
29.18	83.3333
29.19	80
29.2	70
29.21	90
29.22	90
29.23	100
29.24	63.3333
29.25	83.3333
29.26	126.667
29.27	120
29.28	100
29.29	153.333
29.3	116.667
29.31	133.333
29.32	173.333
29.33	170
29.34	186.667
29.35	210
29.36	270
29.37	293.333
29.38	316.667
29.39	370
29.4	400
29.41	423.333
29.42	393.333
29.43	493.333
29.44	480
29.45	493.333
29.46	490
29.47	560
29.48	613.333
29.49	596.667
29.5	560
29.51	573.333
29.52	576.667
29.53	476.667
29.54	503.333
29.55	523.333
29.56	406.667
29.57	446.667
29.58	436.667
29.59	336.667
29.6	300
29.61	240
29.62	210
29.63	223.333
29.64	166.667
29.65	126.667
29.66	143.333
29.67	66.6667
29.68	93.3333
29.69	126.667
29.7	83.3333
29.71	90
29.72	36.6667
29.73	73.3333
29.74	33.3333
29.75	33.3333
29.76	40
29.77	23.3333
29.78	36.6667
29.79	23.3333
29.8	16.6667
29.81	30
29.82	43.3333
29.83	23.3333
29.84	20
29.85	3.33333
29.86	30
29.87	26.6667
29.88	23.3333
29.89	20
29.9	23.3333
29.91	6.66667
29.92	13.3333
29.93	13.3333
29.94	10
29.95	10
29.96	20
29.97	10
29.98	13.3333
29.99	23.3333
30	3.33333
30.01	10
30.02	6.66667
30.03	23.3333
30.04	33.3333
30.05	16.6667
30.06	26.6667
30.07	20
30.08	20
30.09	10
30.1	3.33333
30.11	33.3333
30.12	3.33333
30.13	13.3333
30.14	3.33333
30.15	10
30.16	13.3333
30.17	16.6667
30.18	10
30.19	23.3333
30.2	10
30.21	30
30.22	3.33333
30.23	6.66667
30.24	13.3333
30.25	23.3333
30.26	6.66667
30.27	3.33333
30.28	6.66667
30.29	13.3333
30.3	10
30.31	23.3333
30.32	26.6667
30.33	10
30.34	10
30.35	13.3333
30.36	10
30.37	0
30.38	6.66667
30.39	13.3333
30.4	20
30.41	6.66667
30.42	6.66667
30.43	20
30.44	13.3333
30.45	10
30.46	23.3333
30.47	16.6667
30.48	10
30.49	13.3333
30.5	10
30.51	20
30.52	13.3333
30.53	3.33333
30.54	23.3333
30.55	6.66667
30.56	23.3333
30.57	0
30.58	10
30.59	13.3333
30.6	13.3333
30.61	3.33333
30.62	13.3333
30.63	10
30.64	10
30.65	3.33333
30.66	3.33333
30.67	0
30.68	6.66667
30.69	13.3333
30.7	16.6667
30.71	13.3333
30.72	13.3333
30.73	3.33333
30.74	6.66667
30.75	10
30.76	16.6667
30.77	6.66667
30.78	0
30.79	10
30.8	0
30.81	3.33333
30.82	3.33333
30.83	13.3333
30.84	3.33333
30.85	13.3333
30.86	10
30.87	13.3333
30.88	3.33333
30.89	10
30.9	0
30.91	10
30.92	13.3333
30.93	6.66667
30.94	13.3333
30.95	13.3333
30.96	3.33333
30.97	10
30.98	0
30.99	3.33333
31	13.3333
31.01	10
31.02	6.66667
31.03	3.33333
31.04	3.33333
31.05	10
31.06	3.33333
31.07	10
31.08	13.3333
31.09	6.66667
31.1	13.3333
31.11	23.3333
31.12	16.6667
31.13	3.33333
31.14	13.3333
31.15	13.3333
31.16	3.33333
31.17	0
31.18	16.6667
31.19	6.66667
31.2	13.3333
31.21	6.66667
31.22	0
31.23	16.6667
31.24	13.3333
31.25	0
31.26	10
31.27	10
31.28	26.6667
31.29	3.33333
31.3	0
31.31	3.33333
31.32	6.66667
31.33	10
31.34	3.33333
31.35	33.3333
31.36	23.3333
31.37	6.66667
31.38	10
31.39	20
31.4	26.6667
31.41	13.3333
31.42	23.3333
31.43	13.3333
31.44	26.6667
31.45	20
31.46	16.6667
31.47	10
31.48	26.6667
31.49	20
31.5	23.3333
31.51	16.6667
31.52	30
31.53	26.6667
31.54	30
31.55	36.6667
31.56	20
31.57	26.6667
31.58	33.3333
31.59	20
31.6	20
31.61	23.3333
31.62	36.6667
31.63	26.6667
31.64	16.6667
31.65	33.3333
31.66	16.6667
31.67	20
31.68	20
31.69	16.6667
31.7	16.6667
31.71	10
31.72	13.3333
31.73	10
31.74	26.6667
31.75	3.33333
31.76	13.3333
31.77	26.6667
31.78	3.33333
31.79	10
31.8	16.6667
31.81	3.33333
31.82	13.3333
31.83	13.3333
31.84	6.66667
31.85	10
31.86	6.66667
31.87	3.33333
31.88	6.66667
31.89	16.6667
31.9	6.66667
31.91	13.3333
31.92	0
31.93	6.66667
31.94	3.33333
31.95	13.3333
31.96	16.6667
31.97	16.6667
31.98	10
31.99	6.66667
32	16.6667
32.01	6.66667
32.02	6.66667
32.03	3.33333
32.04	3.33333
32.05	10
32.06	10
32.07	6.66667
32.08	10
32.09	10
32.1	0
32.11	13.3333
32.12	13.3333
32.13	10
32.14	13.3333
32.15	0
32.16	3.33333
32.17	6.66667
32.18	6.66667
32.19	16.6667
32.2	3.33333
32.21	6.66667
32.22	13.3333
32.23	6.66667
32.24	3.33333
32.25	0
32.26	20
32.27	10
32.28	6.66667
32.29	6.66667
32.3	6.66667
32.31	0
32.32	13.3333
32.33	6.66667
32.34	3.33333
32.35	10
32.36	13.3333
32.37	3.33333
32.38	3.33333
32.39	3.33333
32.4	13.3333
32.41	3.33333
32.42	6.66667
32.43	3.33333
32.44	6.66667
32.45	6.66667
32.46	13.3333
32.47	10
32.48	13.3333
32.49	16.6667
32.5	3.33333
32.51	6.66667
32.52	20
32.53	16.6667
32.54	3.33333
32.55	0
32.56	3.33333
32.57	6.66667
32.58	10
32.59	10
32.6	10
32.61	0
32.62	0
32.63	6.66667
32.64	10
32.65	13.3333
32.66	6.66667
32.67	3.33333
32.68	13.3333
32.69	0
32.7	6.66667
32.71	10
32.72	6.66667
32.73	3.33333
32.74	3.33333
32.75	6.66667
32.76	6.66667
32.77	3.33333
32.78	3.33333
32.79	6.66667
32.8	10
32.81	6.66667
32.82	0
32.83	10
32.84	0
32.85	6.66667
32.86	6.66667
32.87	13.3333
32.88	13.3333
32.89	6.66667
32.9	6.66667
32.91	16.6667
32.92	10
32.93	16.6667
32.94	6.66667
32.95	6.66667
32.96	10
32.97	0
32.98	10
32.99	0
33	6.66667

## Sheet: interambu-shaft01
2θ	intensity
27	6.66667
27.01	10
27.02	3.33333
27.03	3.33333
27.04	13.3333
27.05	6.66667
27.06	10
27.07	0
27.08	6.66667
27.09	6.66667
27.1	3.33333
27.11	10
27.12	3.33333
27.13	6.66667
27.14	6.66667
27.15	10
27.16	3.33333
27.17	3.33333
27.18	16.6667
27.19	6.66667
27.2	6.66667
27.21	3.33333
27.22	10
27.23	3.33333
27.24	6.66667
27.25	3.33333
27.26	3.33333
27.27	3.33333
27.28	3.33333
27.29	3.33333
27.3	20
27.31	6.66667
27.32	3.33333
27.33	3.33333
27.34	10
27.35	6.66667
27.36	13.3333
27.37	6.66667
27.38	3.33333
27.39	16.6667
27.4	6.66667
27.41	6.66667
27.42	3.33333
27.43	6.66667
27.44	13.3333
27.45	3.33333
27.46	6.66667
27.47	13.3333
27.48	10
27.49	0
27.5	10
27.51	3.33333
27.52	10
27.53	3.33333
27.54	3.33333
27.55	10
27.56	10
27.57	6.66667
27.58	6.66667
27.59	3.33333
27.6	10
27.61	0
27.62	3.33333
27.63	10
27.64	10
27.65	3.33333
27.66	10
27.67	6.66667
27.68	3.33333
27.69	6.66667
27.7	0
27.71	3.33333
27.72	6.66667
27.73	10
27.74	13.3333
27.75	6.66667
27.76	3.33333
27.77	6.66667
27.78	0
27.79	0
27.8	6.66667
27.81	16.6667
27.82	0
27.83	10
27.84	6.66667
27.85	10
27.86	10
27.87	3.33333
27.88	16.6667
27.89	6.66667
27.9	16.6667
27.91	13.3333
27.92	6.66667
27.93	3.33333
27.94	0
27.95	13.3333
27.96	16.6667
27.97	10
27.98	20
27.99	16.6667
28	13.3333
28.01	6.66667
28.02	6.66667
28.03	23.3333
28.04	6.66667
28.05	10
28.06	23.3333
28.07	10
28.08	20
28.09	13.3333
28.1	6.66667
28.11	23.3333
28.12	30
28.13	13.3333
28.14	13.3333
28.15	20
28.16	26.6667
28.17	20
28.18	30
28.19	40
28.2	43.3333
28.21	70
28.22	36.6667
28.23	46.6667
28.24	43.3333
28.25	50
28.26	70
28.27	73.3333
28.28	60
28.29	63.3333
28.3	116.667
28.31	110
28.32	143.333
28.33	163.333
28.34	160
28.35	203.333
28.36	230
28.37	223.333
28.38	193.333
28.39	213.333
28.4	263.333
28.41	250
28.42	170
28.43	166.667
28.44	193.333
28.45	173.333
28.46	160
28.47	156.667
28.48	133.333
28.49	116.667
28.5	66.6667
28.51	86.6667
28.52	86.6667
28.53	50
28.54	76.6667
28.55	50
28.56	33.3333
28.57	26.6667
28.58	33.3333
28.59	43.3333
28.6	23.3333
28.61	23.3333
28.62	10
28.63	13.3333
28.64	6.66667
28.65	6.66667
28.66	3.33333
28.67	6.66667
28.68	16.6667
28.69	13.3333
28.7	23.3333
28.71	3.33333
28.72	10
28.73	26.6667
28.74	23.3333
28.75	6.66667
28.76	6.66667
28.77	20
28.78	10
28.79	23.3333
28.8	13.3333
28.81	16.6667
28.82	10
28.83	6.66667
28.84	10
28.85	33.3333
28.86	10
28.87	10
28.88	16.6667
28.89	0
28.9	13.3333
28.91	16.6667
28.92	6.66667
28.93	16.6667
28.94	20
28.95	10
28.96	30
28.97	23.3333
28.98	13.3333
28.99	16.6667
29	26.6667
29.01	26.6667
29.02	26.6667
29.03	20
29.04	43.3333
29.05	10
29.06	23.3333
29.07	23.3333
29.08	13.3333
29.09	26.6667
29.1	23.3333
29.11	36.6667
29.12	43.3333
29.13	40
29.14	40
29.15	36.6667
29.16	53.3333
29.17	56.6667
29.18	23.3333
29.19	53.3333
29.2	70
29.21	70
29.22	110
29.23	63.3333
29.24	126.667
29.25	73.3333
29.26	53.3333
29.27	93.3333
29.28	150
29.29	163.333
29.3	146.667
29.31	163.333
29.32	243.333
29.33	283.333
29.34	306.667
29.35	360
29.36	393.333
29.37	383.333
29.38	486.667
29.39	486.667
29.4	543.333
29.41	523.333
29.42	576.667
29.43	596.667
29.44	643.333
29.45	636.667
29.46	683.333
29.47	686.667
29.48	653.333
29.49	586.667
29.5	466.667
29.51	490
29.52	480
29.53	430
29.54	396.667
29.55	420
29.56	370
29.57	270
29.58	240
29.59	186.667
29.6	166.667
29.61	146.667
29.62	136.667
29.63	93.3333
29.64	56.6667
29.65	43.3333
29.66	60
29.67	40
29.68	36.6667
29.69	26.6667
29.7	23.3333
29.71	43.3333
29.72	26.6667
29.73	26.6667
29.74	26.6667
29.75	6.66667
29.76	16.6667
29.77	16.6667
29.78	16.6667
29.79	16.6667
29.8	16.6667
29.81	16.6667
29.82	3.33333
29.83	23.3333
29.84	23.3333
29.85	26.6667
29.86	20
29.87	10
29.88	26.6667
29.89	6.66667
29.9	13.3333
29.91	16.6667
29.92	10
29.93	20
29.94	26.6667
29.95	13.3333
29.96	13.3333
29.97	26.6667
29.98	10
29.99	13.3333
30	10
30.01	6.66667
30.02	16.6667
30.03	3.33333
30.04	13.3333
30.05	10
30.06	6.66667
30.07	10
30.08	3.33333
30.09	10
30.1	23.3333
30.11	13.3333
30.12	10
30.13	16.6667
30.14	10
30.15	26.6667
30.16	0
30.17	6.66667
30.18	10
30.19	16.6667
30.2	6.66667
30.21	3.33333
30.22	10
30.23	6.66667
30.24	3.33333
30.25	10
30.26	10
30.27	20
30.28	3.33333
30.29	16.6667
30.3	13.3333
30.31	6.66667
30.32	6.66667
30.33	6.66667
30.34	6.66667
30.35	13.3333
30.36	3.33333
30.37	3.33333
30.38	6.66667
30.39	16.6667
30.4	16.6667
30.41	6.66667
30.42	16.6667
30.43	13.3333
30.44	6.66667
30.45	3.33333
30.46	0
30.47	13.3333
30.48	13.3333
30.49	10
30.5	13.3333
30.51	13.3333
30.52	6.66667
30.53	3.33333
30.54	20
30.55	10
30.56	0
30.57	16.6667
30.58	13.3333
30.59	13.3333
30.6	10
30.61	3.33333
30.62	3.33333
30.63	13.3333
30.64	10
30.65	13.3333
30.66	10
30.67	6.66667
30.68	3.33333
30.69	13.3333
30.7	10
30.71	10
30.72	6.66667
30.73	3.33333
30.74	6.66667
30.75	3.33333
30.76	10
30.77	6.66667
30.78	0
30.79	0
30.8	3.33333
30.81	6.66667
30.82	6.66667
30.83	10
30.84	6.66667
30.85	6.66667
30.86	3.33333
30.87	13.3333
30.88	3.33333
30.89	10
30.9	3.33333
30.91	6.66667
30.92	0
30.93	10
30.94	3.33333
30.95	10
30.96	6.66667
30.97	16.6667
30.98	13.3333
30.99	10
31	10
31.01	10
31.02	13.3333
31.03	10
31.04	6.66667
31.05	6.66667
31.06	6.66667
31.07	0
31.08	23.3333
31.09	3.33333
31.1	6.66667
31.11	16.6667
31.12	13.3333
31.13	6.66667
31.14	13.3333
31.15	6.66667
31.16	13.3333
31.17	10
31.18	3.33333
31.19	6.66667
31.2	6.66667
31.21	10
31.22	0
31.23	10
31.24	10
31.25	0
31.26	6.66667
31.27	6.66667
31.28	20
31.29	10
31.3	13.3333
31.31	3.33333
31.32	16.6667
31.33	6.66667
31.34	10
31.35	13.3333
31.36	10
31.37	6.66667
31.38	23.3333
31.39	30
31.4	16.6667
31.41	10
31.42	13.3333
31.43	10
31.44	13.3333
31.45	13.3333
31.46	16.6667
31.47	13.3333
31.48	23.3333
31.49	16.6667
31.5	23.3333
31.51	23.3333
31.52	30
31.53	13.3333
31.54	20
31.55	13.3333
31.56	23.3333
31.57	30
31.58	26.6667
31.59	20
31.6	26.6667
31.61	26.6667
31.62	30
31.63	16.6667
31.64	36.6667
31.65	23.3333
31.66	16.6667
31.67	26.6667
31.68	13.3333
31.69	3.33333
31.7	6.66667
31.71	3.33333
31.72	13.3333
31.73	10
31.74	0
31.75	13.3333
31.76	3.33333
31.77	6.66667
31.78	0
31.79	10
31.8	6.66667
31.81	10
31.82	16.6667
31.83	10
31.84	16.6667
31.85	3.33333
31.86	3.33333
31.87	3.33333
31.88	10
31.89	3.33333
31.9	6.66667
31.91	10
31.92	3.33333
31.93	13.3333
31.94	6.66667
31.95	3.33333
31.96	16.6667
31.97	3.33333
31.98	3.33333
31.99	3.33333
32	3.33333
32.01	3.33333
32.02	10
32.03	6.66667
32.04	6.66667
32.05	6.66667
32.06	0
32.07	6.66667
32.08	6.66667
32.09	6.66667
32.1	10
32.11	0
32.12	6.66667
32.13	10
32.14	6.66667
32.15	3.33333
32.16	0
32.17	0
32.18	3.33333
32.19	10
32.2	3.33333
32.21	23.3333
32.22	6.66667
32.23	3.33333
32.24	0
32.25	6.66667
32.26	0
32.27	0
32.28	6.66667
32.29	10
32.3	0
32.31	0
32.32	0
32.33	0
32.34	3.33333
32.35	6.66667
32.36	6.66667
32.37	13.3333
32.38	6.66667
32.39	6.66667
32.4	0
32.41	13.3333
32.42	10
32.43	10
32.44	3.33333
32.45	6.66667
32.46	3.33333
32.47	3.33333
32.48	3.33333
32.49	10
32.5	3.33333
32.51	6.66667
32.52	6.66667
32.53	6.66667
32.54	3.33333
32.55	10
32.56	0
32.57	0
32.58	16.6667
32.59	0
32.6	10
32.61	6.66667
32.62	3.33333
32.63	3.33333
32.64	10
32.65	6.66667
32.66	3.33333
32.67	10
32.68	3.33333
32.69	6.66667
32.7	0
32.71	6.66667
32.72	3.33333
32.73	10
32.74	3.33333
32.75	3.33333
32.76	13.3333
32.77	6.66667
32.78	0
32.79	13.3333
32.8	6.66667
32.81	3.33333
32.82	10
32.83	10
32.84	0
32.85	10
32.86	3.33333
32.87	0
32.88	0
32.89	3.33333
32.9	3.33333
32.91	0
32.92	3.33333
32.93	3.33333
32.94	3.33333
32.95	6.66667
32.96	0
32.97	13.3333
32.98	10
32.99	3.33333
33	3.33333

## Sheet: interambu-shaft02
2θ	intensity
27	0
27.01	10
27.02	6.66667
27.03	0
27.04	0
27.05	6.66667
27.06	6.66667
27.07	3.33333
27.08	6.66667
27.09	10
27.1	0
27.11	10
27.12	3.33333
27.13	13.3333
27.14	3.33333
27.15	0
27.16	13.3333
27.17	0
27.18	10
27.19	3.33333
27.2	3.33333
27.21	6.66667
27.22	6.66667
27.23	3.33333
27.24	10
27.25	6.66667
27.26	13.3333
27.27	6.66667
27.28	3.33333
27.29	3.33333
27.3	6.66667
27.31	6.66667
27.32	10
27.33	3.33333
27.34	6.66667
27.35	3.33333
27.36	10
27.37	3.33333
27.38	10
27.39	10
27.4	0
27.41	3.33333
27.42	6.66667
27.43	13.3333
27.44	6.66667
27.45	10
27.46	6.66667
27.47	0
27.48	6.66667
27.49	3.33333
27.5	3.33333
27.51	6.66667
27.52	6.66667
27.53	13.3333
27.54	6.66667
27.55	6.66667
27.56	6.66667
27.57	6.66667
27.58	16.6667
27.59	6.66667
27.6	13.3333
27.61	20
27.62	6.66667
27.63	13.3333
27.64	3.33333
27.65	0
27.66	0
27.67	6.66667
27.68	6.66667
27.69	10
27.7	6.66667
27.71	6.66667
27.72	3.33333
27.73	10
27.74	6.66667
27.75	0
27.76	6.66667
27.77	3.33333
27.78	13.3333
27.79	0
27.8	10
27.81	16.6667
27.82	10
27.83	10
27.84	6.66667
27.85	13.3333
27.86	16.6667
27.87	6.66667
27.88	10
27.89	6.66667
27.9	13.3333
27.91	10
27.92	6.66667
27.93	13.3333
27.94	20
27.95	6.66667
27.96	16.6667
27.97	13.3333
27.98	10
27.99	6.66667
28	10
28.01	10
28.02	20
28.03	6.66667
28.04	10
28.05	26.6667
28.06	10
28.07	10
28.08	20
28.09	23.3333
28.1	16.6667
28.11	23.3333
28.12	16.6667
28.13	13.3333
28.14	20
28.15	16.6667
28.16	30
28.17	36.6667
28.18	26.6667
28.19	43.3333
28.2	63.3333
28.21	50
28.22	36.6667
28.23	70
28.24	33.3333
28.25	73.3333
28.26	100
28.27	86.6667
28.28	76.6667
28.29	93.3333
28.3	136.667
28.31	183.333
28.32	143.333
28.33	170
28.34	200
28.35	173.333
28.36	166.667
28.37	160
28.38	180
28.39	180
28.4	226.667
28.41	210
28.42	213.333
28.43	173.333
28.44	143.333
28.45	133.333
28.46	106.667
28.47	90
28.48	63.3333
28.49	76.6667
28.5	50
28.51	70
28.52	53.3333
28.53	33.3333
28.54	30
28.55	53.3333
28.56	20
28.57	33.3333
28.58	30
28.59	13.3333
28.6	16.6667
28.61	6.66667
28.62	13.3333
28.63	10
28.64	20
28.65	10
28.66	20
28.67	26.6667
28.68	10
28.69	23.3333
28.7	20
28.71	13.3333
28.72	20
28.73	13.3333
28.74	13.3333
28.75	13.3333
28.76	13.3333
28.77	13.3333
28.78	10
28.79	10
28.8	0
28.81	3.33333
28.82	16.6667
28.83	23.3333
28.84	26.6667
28.85	10
28.86	23.3333
28.87	3.33333
28.88	30
28.89	3.33333
28.9	33.3333
28.91	16.6667
28.92	30
28.93	6.66667
28.94	16.6667
28.95	13.3333
28.96	33.3333
28.97	16.6667
28.98	26.6667
28.99	23.3333
29	20
29.01	13.3333
29.02	43.3333
29.03	13.3333
29.04	53.3333
29.05	23.3333
29.06	36.6667
29.07	36.6667
29.08	53.3333
29.09	56.6667
29.1	53.3333
29.11	43.3333
29.12	56.6667
29.13	56.6667
29.14	46.6667
29.15	56.6667
29.16	43.3333
29.17	56.6667
29.18	80
29.19	73.3333
29.2	110
29.21	96.6667
29.22	133.333
29.23	106.667
29.24	163.333
29.25	190
29.26	230
29.27	193.333
29.28	236.667
29.29	243.333
29.3	293.333
29.31	280
29.32	406.667
29.33	373.333
29.34	473.333
29.35	486.667
29.36	643.333
29.37	700
29.38	730
29.39	733.333
29.4	813.333
29.41	933.333
29.42	1003.33
29.43	1010
29.44	1026.67
29.45	993.333
29.46	843.333
29.47	816.667
29.48	686.667
29.49	613.333
29.5	700
29.51	640
29.52	523.333
29.53	533.333
29.54	393.333
29.55	336.667
29.56	240
29.57	210
29.58	173.333
29.59	150
29.6	120
29.61	100
29.62	86.6667
29.63	43.3333
29.64	26.6667
29.65	36.6667
29.66	43.3333
29.67	23.3333
29.68	16.6667
29.69	46.6667
29.7	40
29.71	50
29.72	10
29.73	26.6667
29.74	13.3333
29.75	16.6667
29.76	20
29.77	20
29.78	13.3333
29.79	20
29.8	13.3333
29.81	6.66667
29.82	3.33333
29.83	26.6667
29.84	10
29.85	10
29.86	20
29.87	20
29.88	16.6667
29.89	23.3333
29.9	16.6667
29.91	10
29.92	6.66667
29.93	16.6667
29.94	10
29.95	16.6667
29.96	10
29.97	20
29.98	16.6667
29.99	16.6667
30	13.3333
30.01	10
30.02	3.33333
30.03	13.3333
30.04	6.66667
30.05	20
30.06	13.3333
30.07	3.33333
30.08	10
30.09	16.6667
30.1	13.3333
30.11	6.66667
30.12	10
30.13	16.6667
30.14	10
30.15	10
30.16	10
30.17	10
30.18	13.3333
30.19	3.33333
30.2	3.33333
30.21	13.3333
30.22	6.66667
30.23	13.3333
30.24	13.3333
30.25	10
30.26	6.66667
30.27	16.6667
30.28	6.66667
30.29	6.66667
30.3	13.3333
30.31	6.66667
30.32	6.66667
30.33	10
30.34	6.66667
30.35	16.6667
30.36	3.33333
30.37	10
30.38	3.33333
30.39	6.66667
30.4	20
30.41	6.66667
30.42	10
30.43	10
30.44	13.3333
30.45	10
30.46	3.33333
30.47	6.66667
30.48	13.3333
30.49	13.3333
30.5	3.33333
30.51	13.3333
30.52	10
30.53	6.66667
30.54	13.3333
30.55	0
30.56	20
30.57	13.3333
30.58	13.3333
30.59	10
30.6	6.66667
30.61	6.66667
30.62	13.3333
30.63	10
30.64	10
30.65	6.66667
30.66	10
30.67	13.3333
30.68	13.3333
30.69	10
30.7	16.6667
30.71	13.3333
30.72	6.66667
30.73	0
30.74	13.3333
30.75	13.3333
30.76	3.33333
30.77	0
30.78	6.66667
30.79	10
30.8	13.3333
30.81	3.33333
30.82	3.33333
30.83	10
30.84	3.33333
30.85	13.3333
30.86	13.3333
30.87	6.66667
30.88	10
30.89	6.66667
30.9	6.66667
30.91	6.66667
30.92	6.66667
30.93	10
30.94	3.33333
30.95	6.66667
30.96	3.33333
30.97	20
30.98	6.66667
30.99	16.6667
31	13.3333
31.01	6.66667
31.02	13.3333
31.03	10
31.04	10
31.05	6.66667
31.06	10
31.07	3.33333
31.08	6.66667
31.09	6.66667
31.1	3.33333
31.11	3.33333
31.12	3.33333
31.13	6.66667
31.14	10
31.15	6.66667
31.16	0
31.17	3.33333
31.18	13.3333
31.19	6.66667
31.2	3.33333
31.21	20
31.22	6.66667
31.23	3.33333
31.24	13.3333
31.25	10
31.26	10
31.27	6.66667
31.28	10
31.29	13.3333
31.3	6.66667
31.31	3.33333
31.32	23.3333
31.33	16.6667
31.34	20
31.35	30
31.36	26.6667
31.37	40
31.38	26.6667
31.39	30
31.4	33.3333
31.41	30
31.42	30
31.43	6.66667
31.44	13.3333
31.45	23.3333
31.46	43.3333
31.47	43.3333
31.48	33.3333
31.49	20
31.5	26.6667
31.51	16.6667
31.52	16.6667
31.53	30
31.54	36.6667
31.55	43.3333
31.56	26.6667
31.57	20
31.58	13.3333
31.59	33.3333
31.6	16.6667
31.61	6.66667
31.62	6.66667
31.63	26.6667
31.64	16.6667
31.65	13.3333
31.66	3.33333
31.67	13.3333
31.68	13.3333
31.69	6.66667
31.7	16.6667
31.71	6.66667
31.72	3.33333
31.73	6.66667
31.74	6.66667
31.75	10
31.76	6.66667
31.77	6.66667
31.78	10
31.79	3.33333
31.8	13.3333
31.81	3.33333
31.82	6.66667
31.83	10
31.84	10
31.85	13.3333
31.86	0
31.87	6.66667
31.88	0
31.89	6.66667
31.9	0
31.91	3.33333
31.92	6.66667
31.93	13.3333
31.94	16.6667
31.95	3.33333
31.96	6.66667
31.97	13.3333
31.98	23.3333
31.99	6.66667
32	10
32.01	6.66667
32.02	6.66667
32.03	6.66667
32.04	13.3333
32.05	10
32.06	3.33333
32.07	3.33333
32.08	6.66667
32.09	3.33333
32.1	3.33333
32.11	6.66667
32.12	6.66667
32.13	0
32.14	3.33333
32.15	3.33333
32.16	10
32.17	0
32.18	6.66667
32.19	0
32.2	3.33333
32.21	3.33333
32.22	10
32.23	6.66667
32.24	10
32.25	10
32.26	6.66667
32.27	6.66667
32.28	3.33333
32.29	20
32.3	16.6667
32.31	6.66667
32.32	3.33333
32.33	10
32.34	3.33333
32.35	0
32.36	0
32.37	0
32.38	3.33333
32.39	6.66667
32.4	6.66667
32.41	3.33333
32.42	10
32.43	6.66667
32.44	6.66667
32.45	0
32.46	3.33333
32.47	10
32.48	0
32.49	13.3333
32.5	3.33333
32.51	0
32.52	10
32.53	3.33333
32.54	13.3333
32.55	6.66667
32.56	6.66667
32.57	6.66667
32.58	10
32.59	10
32.6	10
32.61	20
32.62	10
32.63	3.33333
32.64	3.33333
32.65	10
32.66	0
32.67	6.66667
32.68	0
32.69	10
32.7	0
32.71	6.66667
32.72	10
32.73	10
32.74	10
32.75	3.33333
32.76	3.33333
32.77	0
32.78	13.3333
32.79	10
32.8	6.66667
32.81	6.66667
32.82	3.33333
32.83	3.33333
32.84	3.33333
32.85	0
32.86	6.66667
32.87	3.33333
32.88	6.66667
32.89	6.66667
32.9	6.66667
32.91	3.33333
32.92	3.33333
32.93	10
32.94	3.33333
32.95	3.33333
32.96	13.3333
32.97	6.66667
32.98	10
32.99	13.3333
33	6.66667

## Sheet: interambu-shaft03
2θ	intensity
27	6.66667
27.01	10
27.02	13.3333
27.03	13.3333
27.04	13.3333
27.05	13.3333
27.06	10
27.07	0
27.08	3.33333
27.09	0
27.1	10
27.11	10
27.12	3.33333
27.13	3.33333
27.14	3.33333
27.15	16.6667
27.16	3.33333
27.17	3.33333
27.18	16.6667
27.19	16.6667
27.2	3.33333
27.21	6.66667
27.22	3.33333
27.23	3.33333
27.24	6.66667
27.25	10
27.26	6.66667
27.27	6.66667
27.28	6.66667
27.29	0
27.3	13.3333
27.31	10
27.32	3.33333
27.33	0
27.34	3.33333
27.35	6.66667
27.36	6.66667
27.37	3.33333
27.38	3.33333
27.39	3.33333
27.4	0
27.41	10
27.42	0
27.43	0
27.44	10
27.45	6.66667
27.46	10
27.47	6.66667
27.48	16.6667
27.49	10
27.5	10
27.51	6.66667
27.52	3.33333
27.53	10
27.54	3.33333
27.55	0
27.56	0
27.57	0
27.58	6.66667
27.59	3.33333
27.6	3.33333
27.61	16.6667
27.62	10
27.63	3.33333
27.64	6.66667
27.65	3.33333
27.66	16.6667
27.67	3.33333
27.68	13.3333
27.69	13.3333
27.7	13.3333
27.71	6.66667
27.72	13.3333
27.73	10
27.74	3.33333
27.75	6.66667
27.76	10
27.77	3.33333
27.78	3.33333
27.79	10
27.8	3.33333
27.81	3.33333
27.82	10
27.83	10
27.84	6.66667
27.85	23.3333
27.86	13.3333
27.87	6.66667
27.88	13.3333
27.89	6.66667
27.9	6.66667
27.91	13.3333
27.92	3.33333
27.93	13.3333
27.94	16.6667
27.95	13.3333
27.96	0
27.97	16.6667
27.98	13.3333
27.99	3.33333
28	10
28.01	16.6667
28.02	10
28.03	20
28.04	16.6667
28.05	10
28.06	10
28.07	13.3333
28.08	26.6667
28.09	16.6667
28.1	10
28.11	16.6667
28.12	33.3333
28.13	50
28.14	30
28.15	33.3333
28.16	36.6667
28.17	43.3333
28.18	40
28.19	43.3333
28.2	50
28.21	50
28.22	60
28.23	60
28.24	70
28.25	66.6667
28.26	76.6667
28.27	60
28.28	96.6667
28.29	120
28.3	156.667
28.31	166.667
28.32	186.667
28.33	186.667
28.34	186.667
28.35	186.667
28.36	176.667
28.37	203.333
28.38	210
28.39	216.667
28.4	220
28.41	193.333
28.42	190
28.43	176.667
28.44	163.333
28.45	126.667
28.46	133.333
28.47	110
28.48	120
28.49	103.333
28.5	106.667
28.51	50
28.52	66.6667
28.53	23.3333
28.54	36.6667
28.55	40
28.56	23.3333
28.57	20
28.58	23.3333
28.59	26.6667
28.6	20
28.61	20
28.62	16.6667
28.63	13.3333
28.64	20
28.65	13.3333
28.66	13.3333
28.67	10
28.68	0
28.69	20
28.7	26.6667
28.71	10
28.72	23.3333
28.73	20
28.74	16.6667
28.75	6.66667
28.76	13.3333
28.77	13.3333
28.78	10
28.79	36.6667
28.8	13.3333
28.81	6.66667
28.82	6.66667
28.83	23.3333
28.84	20
28.85	10
28.86	16.6667
28.87	20
28.88	6.66667
28.89	16.6667
28.9	20
28.91	20
28.92	23.3333
28.93	16.6667
28.94	26.6667
28.95	30
28.96	16.6667
28.97	10
28.98	33.3333
28.99	16.6667
29	20
29.01	40
29.02	26.6667
29.03	36.6667
29.04	50
29.05	56.6667
29.06	86.6667
29.07	83.3333
29.08	86.6667
29.09	93.3333
29.1	73.3333
29.11	100
29.12	63.3333
29.13	43.3333
29.14	70
29.15	106.667
29.16	123.333
29.17	133.333
29.18	123.333
29.19	166.667
29.2	143.333
29.21	130
29.22	156.667
29.23	176.667
29.24	156.667
29.25	143.333
29.26	230
29.27	203.333
29.28	226.667
29.29	203.333
29.3	260
29.31	220
29.32	206.667
29.33	326.667
29.34	286.667
29.35	286.667
29.36	390
29.37	350
29.38	423.333
29.39	453.333
29.4	590
29.41	556.667
29.42	680
29.43	666.667
29.44	663.333
29.45	746.667
29.46	743.333
29.47	693.333
29.48	683.333
29.49	566.667
29.5	700
29.51	570
29.52	586.667
29.53	453.333
29.54	426.667
29.55	420
29.56	300
29.57	290
29.58	270
29.59	176.667
29.6	176.667
29.61	106.667
29.62	80
29.63	63.3333
29.64	56.6667
29.65	43.3333
29.66	60
29.67	16.6667
29.68	43.3333
29.69	23.3333
29.7	20
29.71	10
29.72	23.3333
29.73	3.33333
29.74	16.6667
29.75	30
29.76	20
29.77	23.3333
29.78	13.3333
29.79	3.33333
29.8	10
29.81	20
29.82	13.3333
29.83	13.3333
29.84	10
29.85	13.3333
29.86	20
29.87	26.6667
29.88	20
29.89	10
29.9	10
29.91	10
29.92	13.3333
29.93	20
29.94	20
29.95	10
29.96	13.3333
29.97	16.6667
29.98	10
29.99	10
30	16.6667
30.01	20
30.02	16.6667
30.03	13.3333
30.04	10
30.05	13.3333
30.06	3.33333
30.07	13.3333
30.08	13.3333
30.09	10
30.1	10
30.11	6.66667
30.12	23.3333
30.13	13.3333
30.14	6.66667
30.15	13.3333
30.16	3.33333
30.17	3.33333
30.18	3.33333
30.19	3.33333
30.2	10
30.21	13.3333
30.22	10
30.23	10
30.24	6.66667
30.25	13.3333
30.26	6.66667
30.27	0
30.28	6.66667
30.29	10
30.3	6.66667
30.31	10
30.32	6.66667
30.33	13.3333
30.34	30
30.35	20
30.36	16.6667
30.37	10
30.38	16.6667
30.39	6.66667
30.4	16.6667
30.41	16.6667
30.42	10
30.43	20
30.44	3.33333
30.45	13.3333
30.46	10
30.47	0
30.48	3.33333
30.49	3.33333
30.5	10
30.51	6.66667
30.52	10
30.53	3.33333
30.54	13.3333
30.55	10
30.56	10
30.57	13.3333
30.58	23.3333
30.59	3.33333
30.6	20
30.61	10
30.62	6.66667
30.63	10
30.64	6.66667
30.65	13.3333
30.66	6.66667
30.67	3.33333
30.68	10
30.69	6.66667
30.7	3.33333
30.71	20
30.72	6.66667
30.73	0
30.74	0
30.75	13.3333
30.76	6.66667
30.77	3.33333
30.78	10
30.79	13.3333
30.8	3.33333
30.81	13.3333
30.82	10
30.83	3.33333
30.84	13.3333
30.85	6.66667
30.86	16.6667
30.87	0
30.88	16.6667
30.89	6.66667
30.9	6.66667
30.91	6.66667
30.92	0
30.93	3.33333
30.94	3.33333
30.95	0
30.96	10
30.97	13.3333
30.98	23.3333
30.99	3.33333
31	0
31.01	13.3333
31.02	20
31.03	10
31.04	20
31.05	13.3333
31.06	3.33333
31.07	6.66667
31.08	0
31.09	6.66667
31.1	3.33333
31.11	10
31.12	10
31.13	16.6667
31.14	3.33333
31.15	6.66667
31.16	0
31.17	3.33333
31.18	3.33333
31.19	3.33333
31.2	13.3333
31.21	13.3333
31.22	13.3333
31.23	16.6667
31.24	6.66667
31.25	6.66667
31.26	6.66667
31.27	13.3333
31.28	10
31.29	10
31.3	20
31.31	6.66667
31.32	20
31.33	23.3333
31.34	10
31.35	13.3333
31.36	10
31.37	16.6667
31.38	16.6667
31.39	20
31.4	33.3333
31.41	26.6667
31.42	33.3333
31.43	23.3333
31.44	26.6667
31.45	36.6667
31.46	26.6667
31.47	46.6667
31.48	16.6667
31.49	50
31.5	43.3333
31.51	30
31.52	40
31.53	56.6667
31.54	50
31.55	46.6667
31.56	43.3333
31.57	33.3333
31.58	33.3333
31.59	16.6667
31.6	23.3333
31.61	16.6667
31.62	23.3333
31.63	26.6667
31.64	6.66667
31.65	26.6667
31.66	10
31.67	6.66667
31.68	10
31.69	10
31.7	13.3333
31.71	3.33333
31.72	6.66667
31.73	3.33333
31.74	0
31.75	0
31.76	6.66667
31.77	0
31.78	6.66667
31.79	0
31.8	3.33333
31.81	10
31.82	10
31.83	0
31.84	3.33333
31.85	3.33333
31.86	3.33333
31.87	13.3333
31.88	3.33333
31.89	13.3333
31.9	3.33333
31.91	6.66667
31.92	6.66667
31.93	3.33333
31.94	6.66667
31.95	3.33333
31.96	3.33333
31.97	3.33333
31.98	0
31.99	10
32	13.3333
32.01	13.3333
32.02	6.66667
32.03	3.33333
32.04	0
32.05	6.66667
32.06	3.33333
32.07	16.6667
32.08	6.66667
32.09	3.33333
32.1	6.66667
32.11	0
32.12	13.3333
32.13	10
32.14	13.3333
32.15	3.33333
32.16	13.3333
32.17	0
32.18	3.33333
32.19	13.3333
32.2	13.3333
32.21	3.33333
32.22	3.33333
32.23	3.33333
32.24	3.33333
32.25	0
32.26	23.3333
32.27	6.66667
32.28	0
32.29	10
32.3	16.6667
32.31	20
32.32	20
32.33	13.3333
32.34	10
32.35	0
32.36	3.33333
32.37	3.33333
32.38	6.66667
32.39	10
32.4	6.66667
32.41	3.33333
32.42	0
32.43	10
32.44	6.66667
32.45	13.3333
32.46	6.66667
32.47	10
32.48	6.66667
32.49	0
32.5	3.33333
32.51	3.33333
32.52	0
32.53	6.66667
32.54	6.66667
32.55	10
32.56	13.3333
32.57	6.66667
32.58	6.66667
32.59	10
32.6	3.33333
32.61	10
32.62	3.33333
32.63	0
32.64	6.66667
32.65	10
32.66	0
32.67	3.33333
32.68	6.66667
32.69	10
32.7	3.33333
32.71	13.3333
32.72	10
32.73	3.33333
32.74	3.33333
32.75	3.33333
32.76	0
32.77	0
32.78	10
32.79	0
32.8	0
32.81	16.6667
32.82	6.66667
32.83	16.6667
32.84	3.33333
32.85	20
32.86	13.3333
32.87	3.33333
32.88	6.66667
32.89	6.66667
32.9	10
32.91	10
32.92	6.66667
32.93	3.33333
32.94	0
32.95	10
32.96	13.3333
32.97	3.33333
32.98	3.33333
32.99	6.66667
33	3.33333
